# Supplementary material
Source: publisher figshare collection journal article supplement (https://acs.figshare.com/ndownloader/files/17448839)
Supplement: Supplementary file 1 [file 17448839]

# Nickel-Catalyzed Defluorinative Reductive Cross-Coupling Reaction of *gem*-Difluoroalkenes with Thiosulfonate or Selenium Sulfonate

Jian Li,<sup>†</sup> Weidong Rao<sup>‡</sup> Shun-Yi Wang,<sup>\*,†</sup> and Shun-Jun Ji<sup>\*,†</sup>

<sup>†</sup>Key Laboratory of Organic Synthesis of Jiangsu Province, College of Chemistry, Chemical Engineering and Materials Science, and Collaborative Innovation Center of Suzhou Nano Science and Technology, Soochow University, Suzhou, 215123, China.

<sup>‡</sup>Jiangsu Key Laboratory of Biomass-based Green Fuels and Chemicals, College of Chemical Engineering, Nanjing Forestry University, Nanjing 210037, China.

E-mail: shunyi@suda.edu.cn; shunjun@suda.edu.cn

## Contents

Copies of <sup>1</sup>H, <sup>19</sup>F and <sup>13</sup>C NMR Spectra for Compounds -----S2-S56

## Characterization Data of Compounds

### Copies of $^1\text{H}$ NMR, $^{13}\text{C}$ NMR and $^{19}\text{F}$ NMR Spectra for Compounds

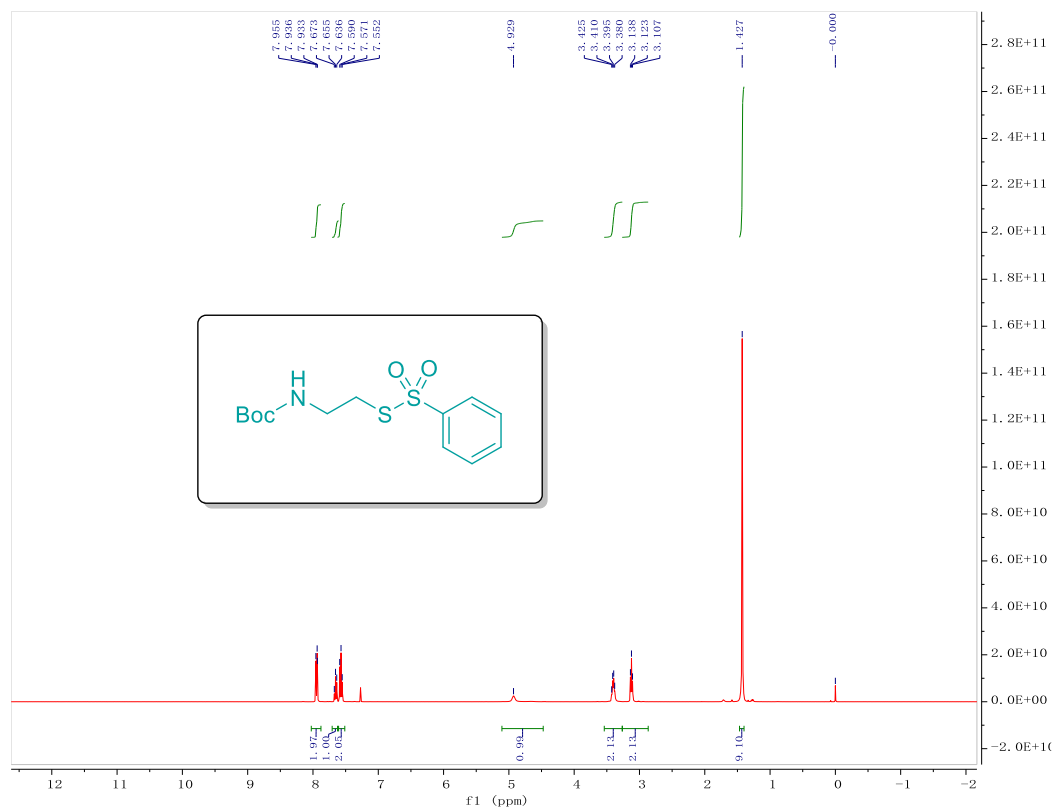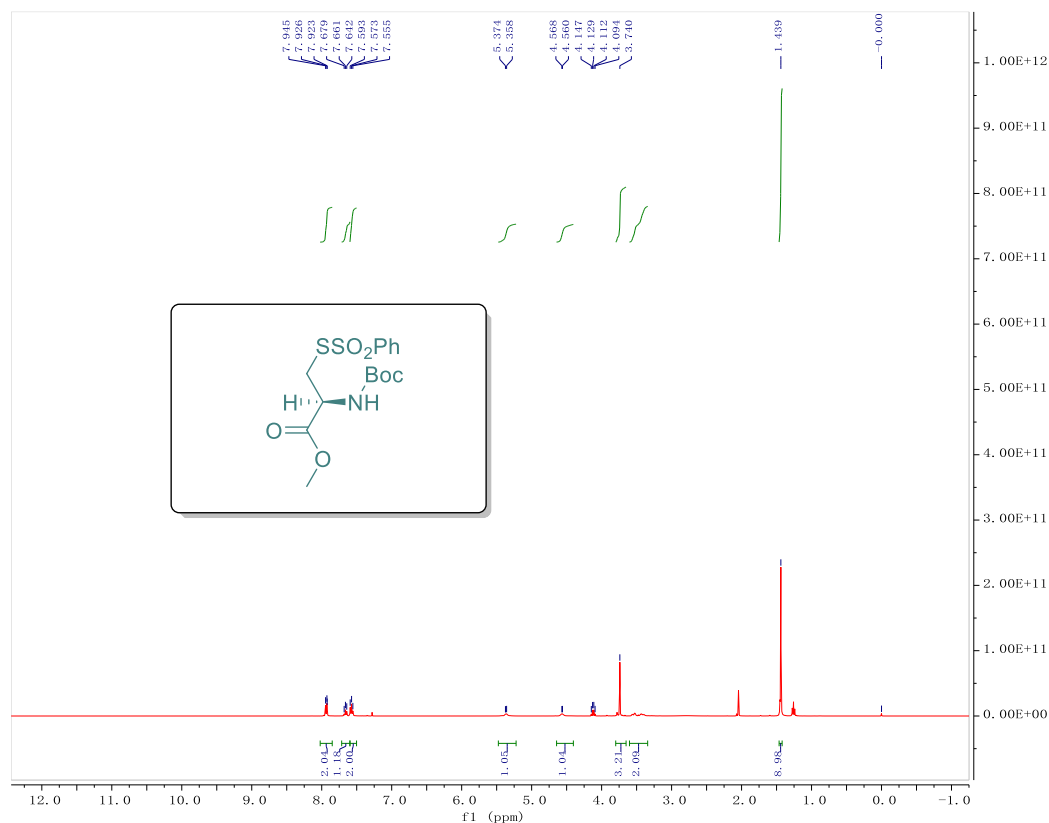

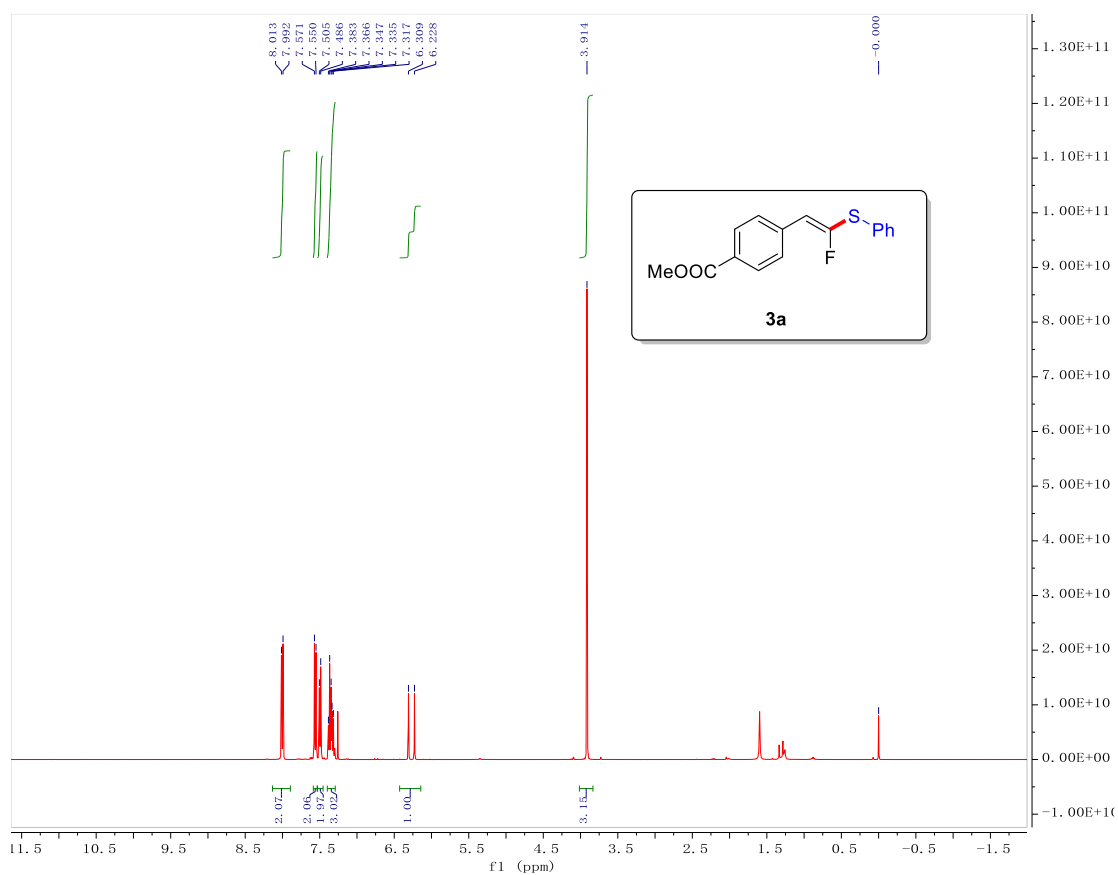

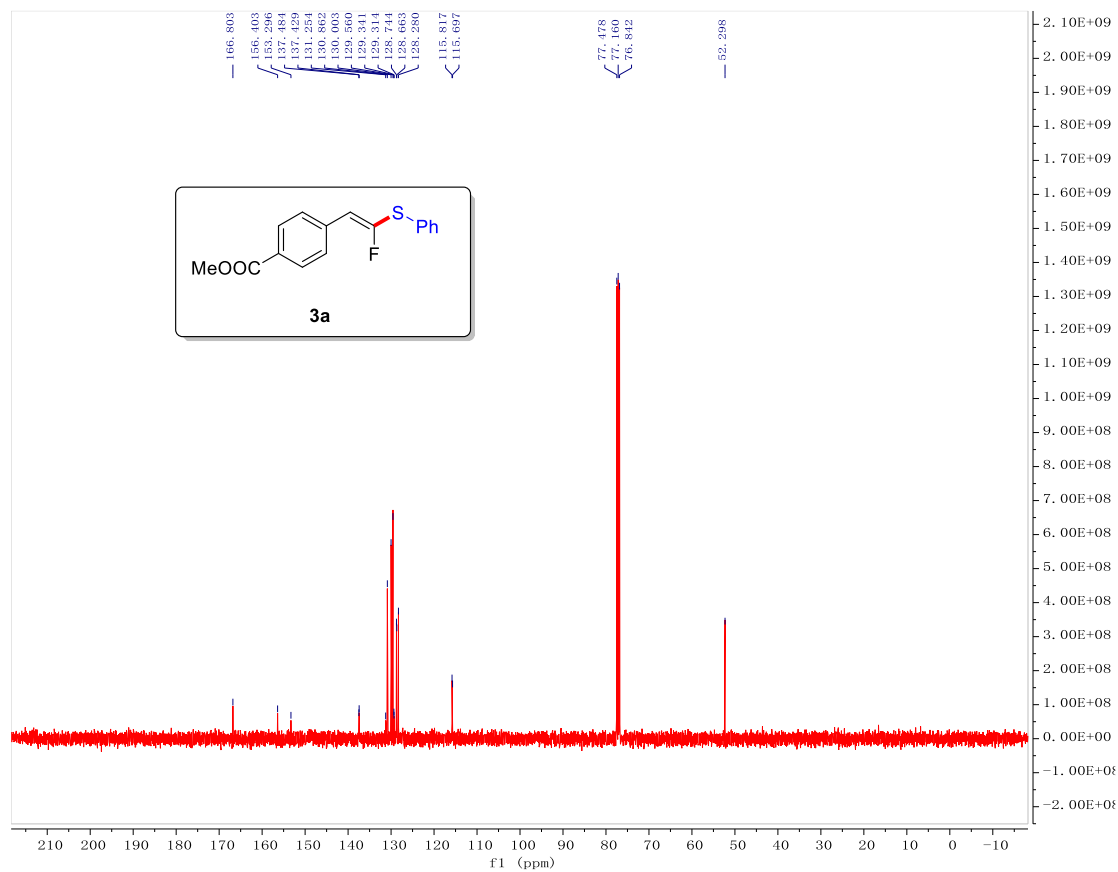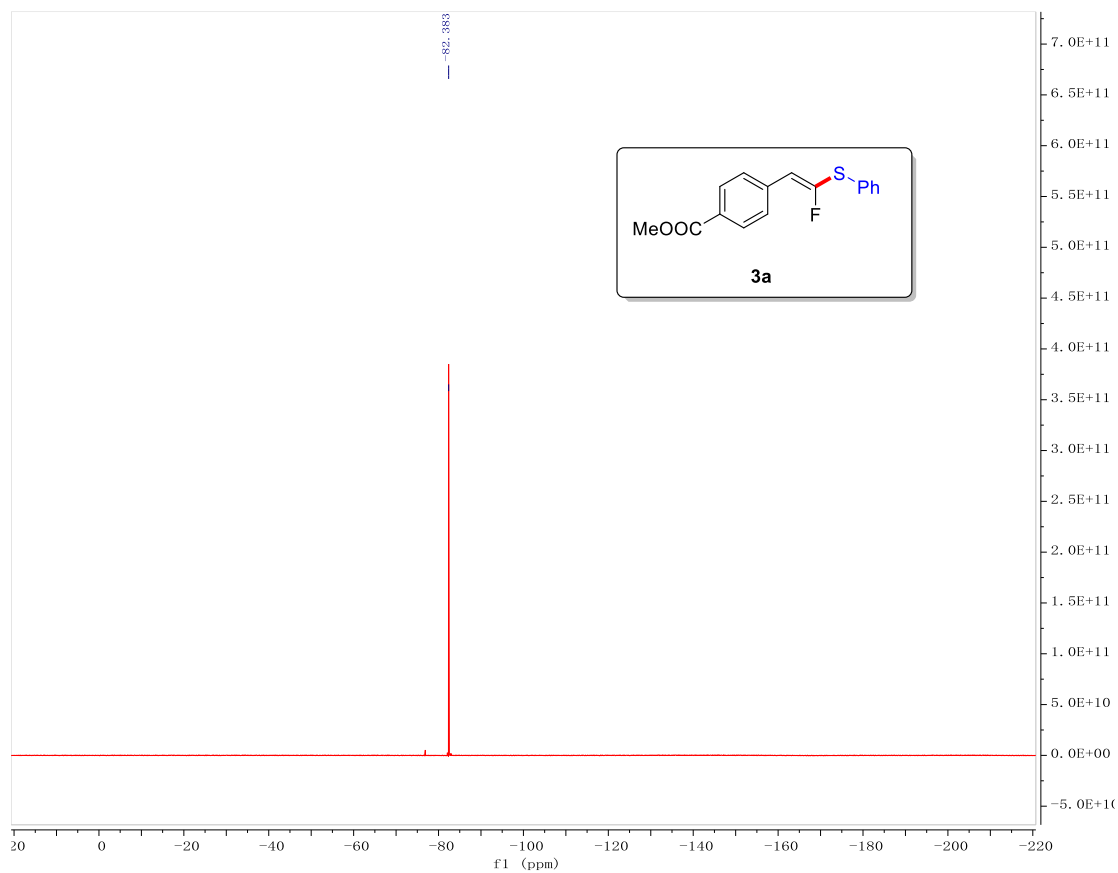



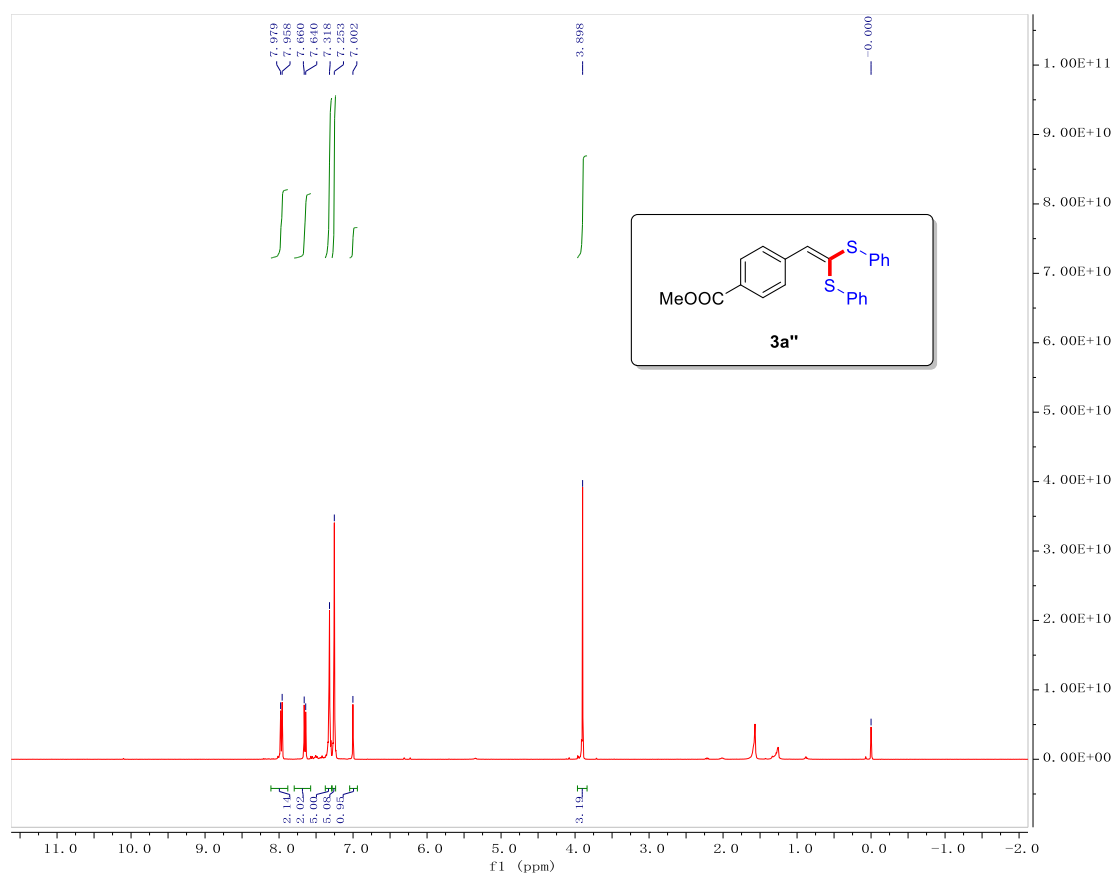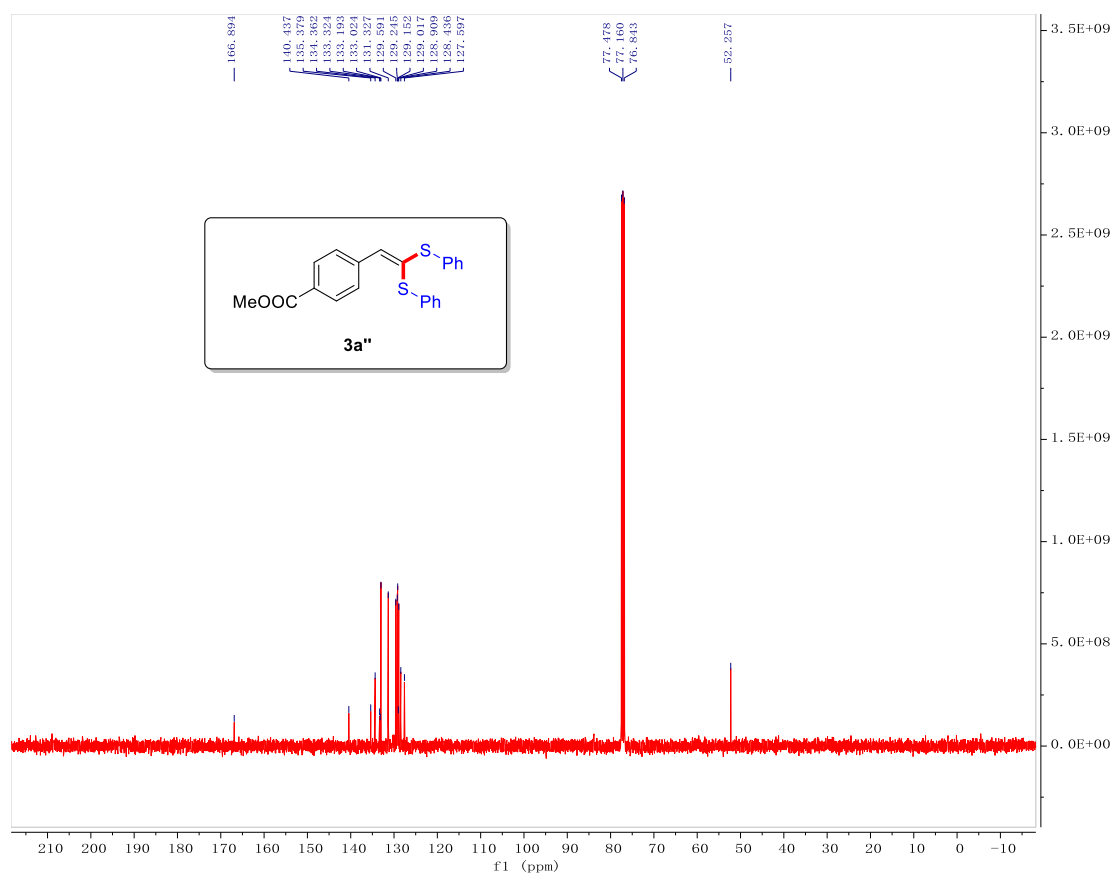

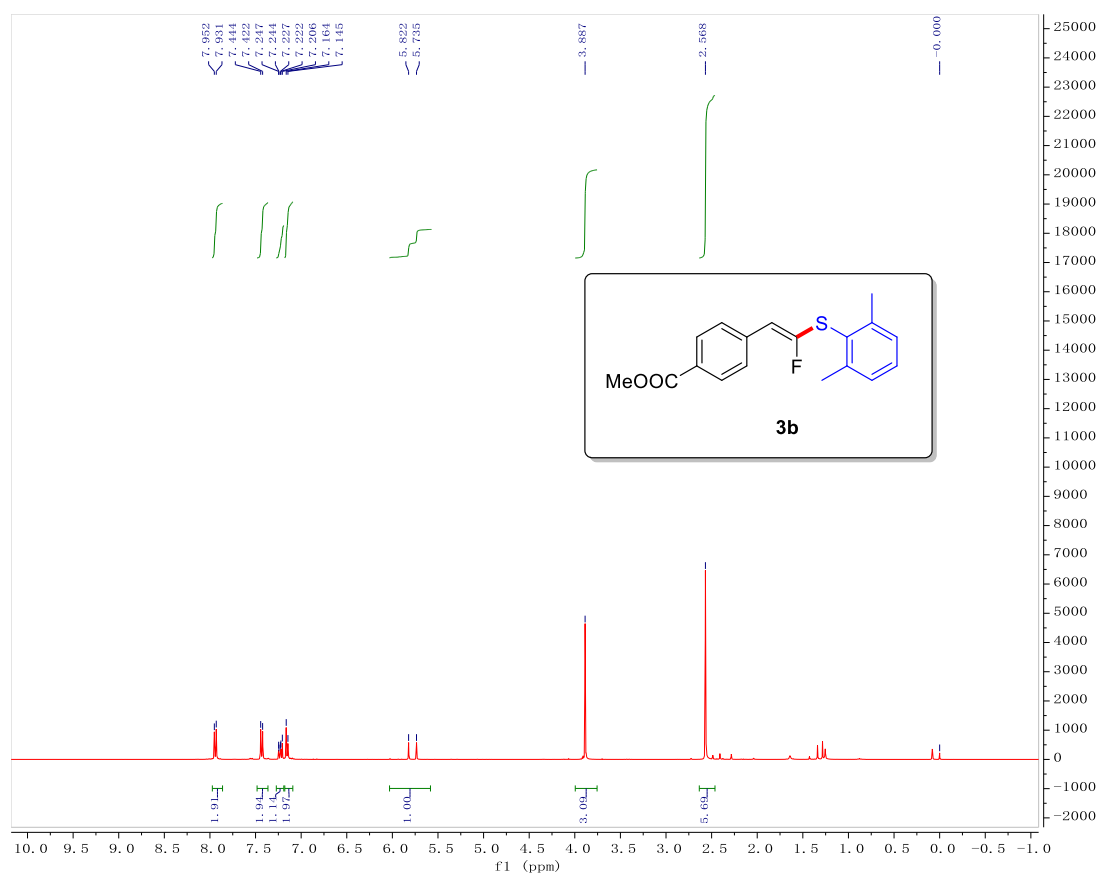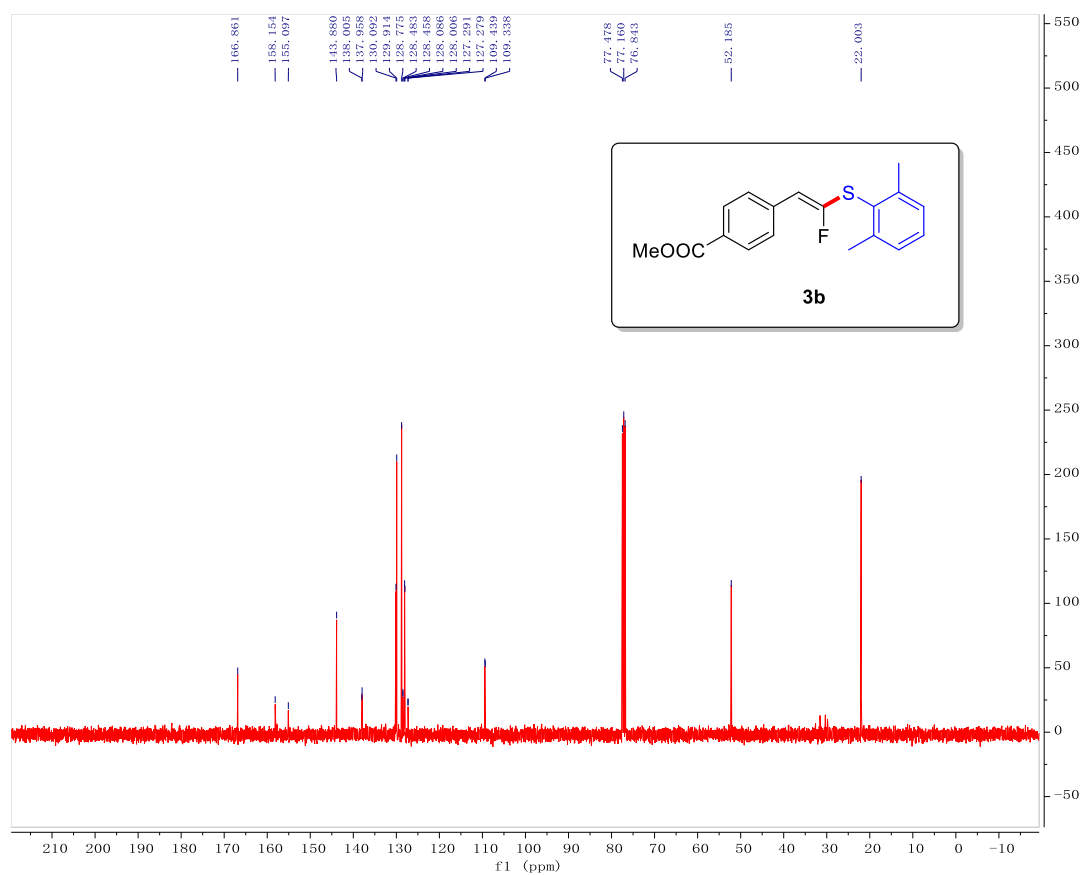

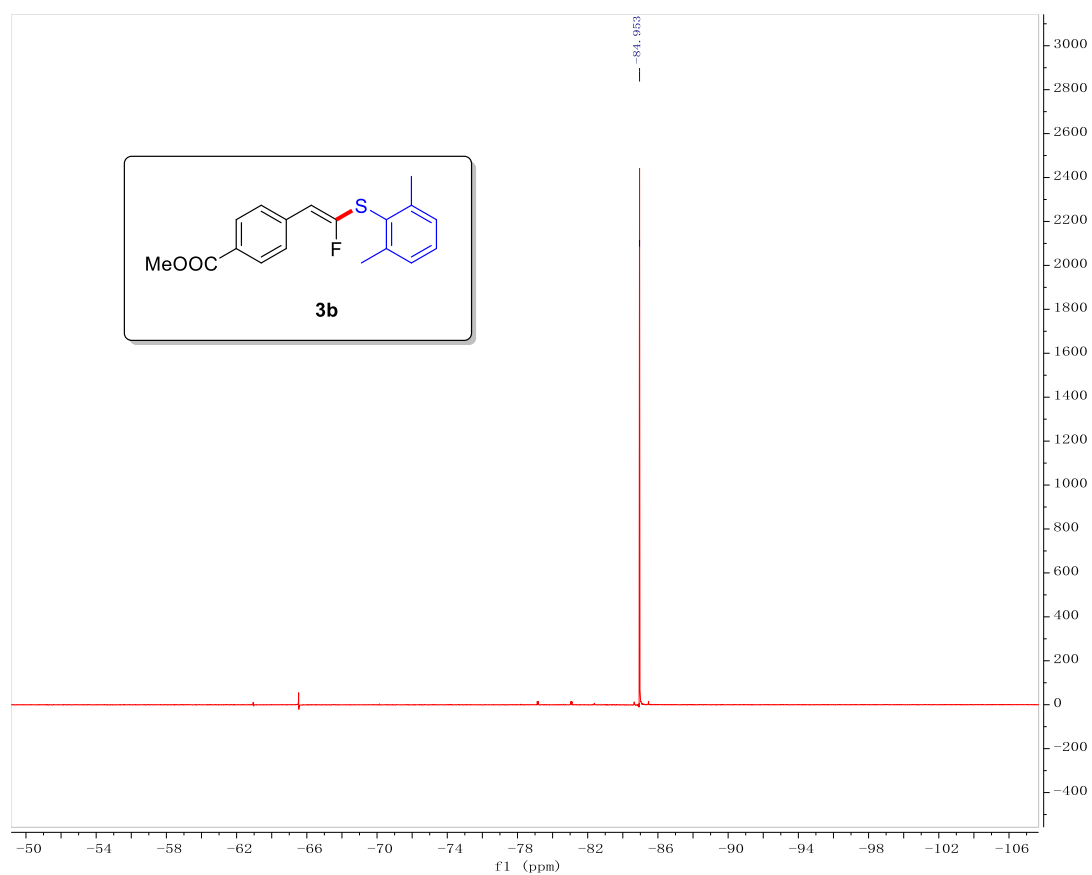

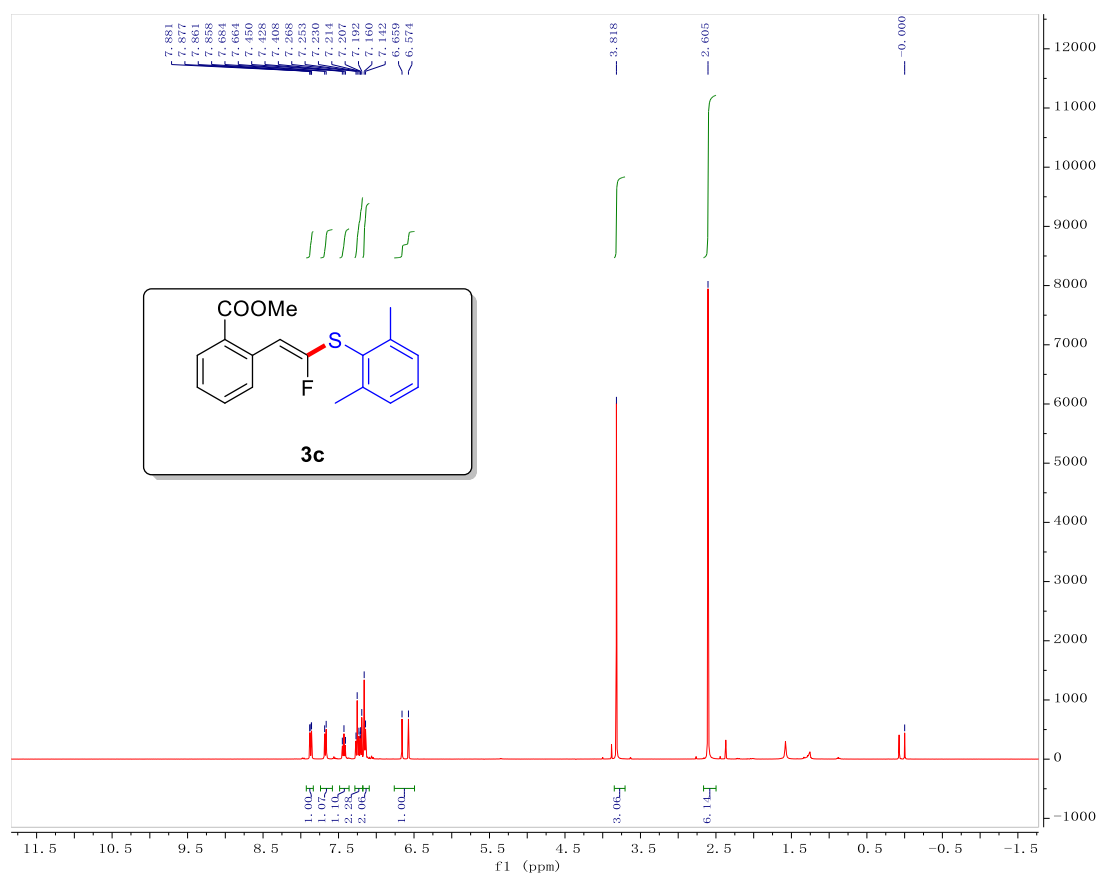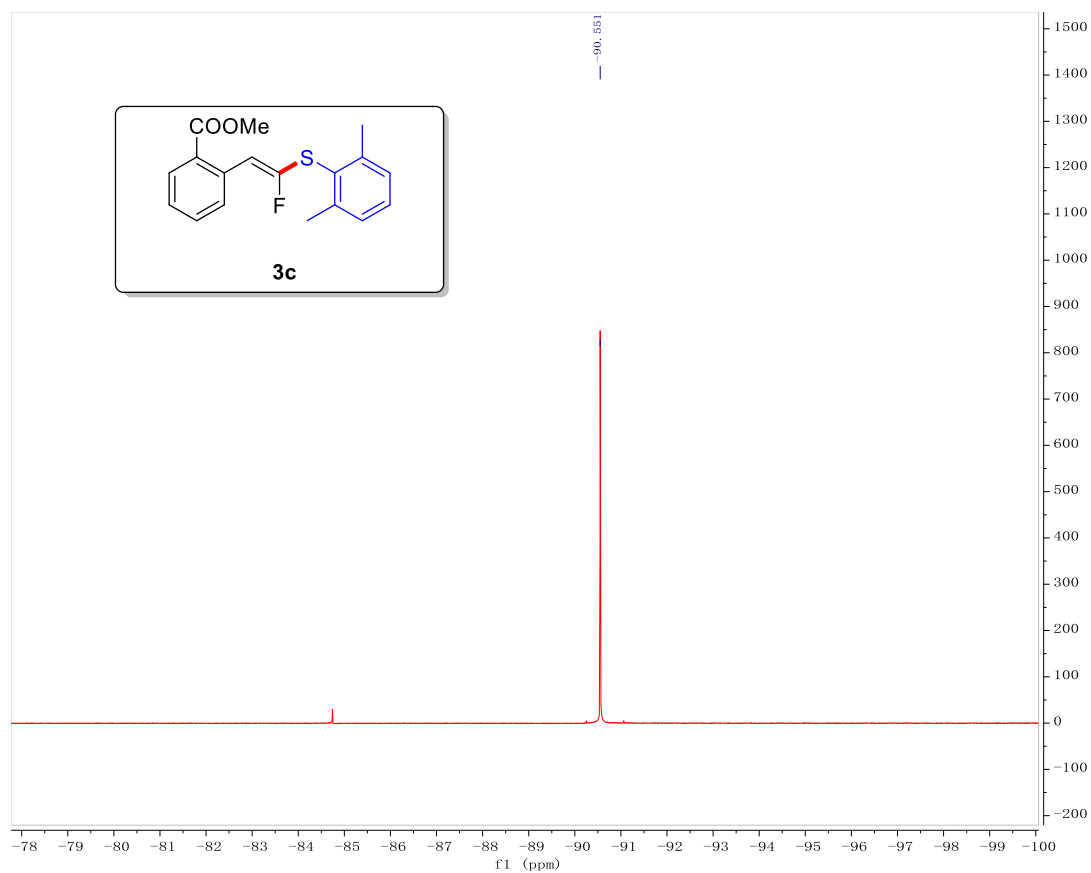

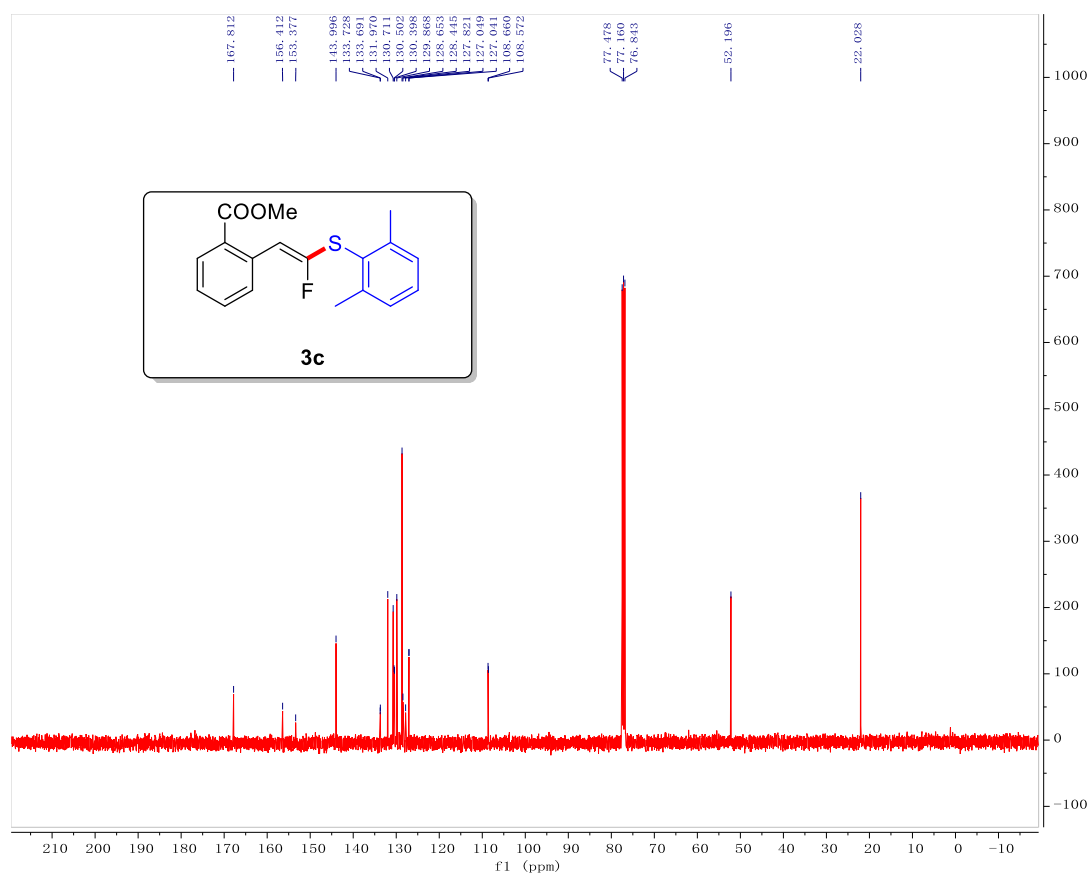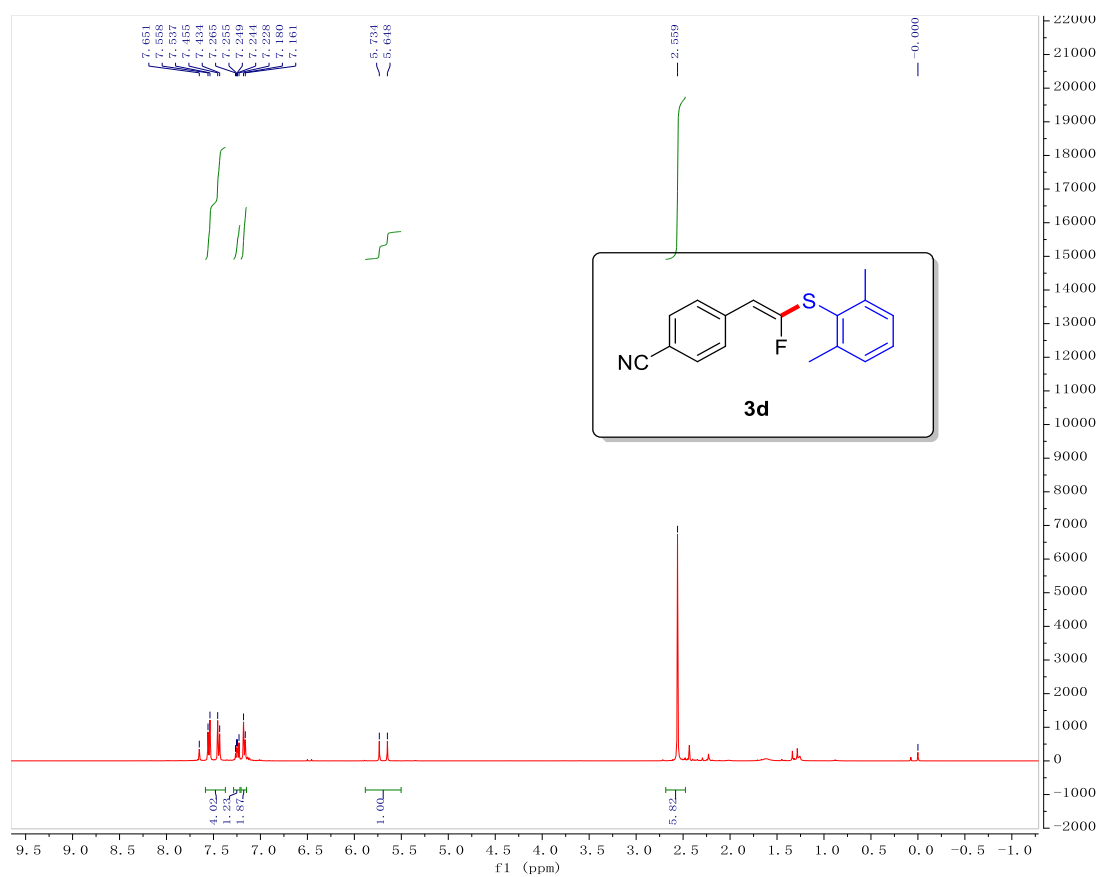

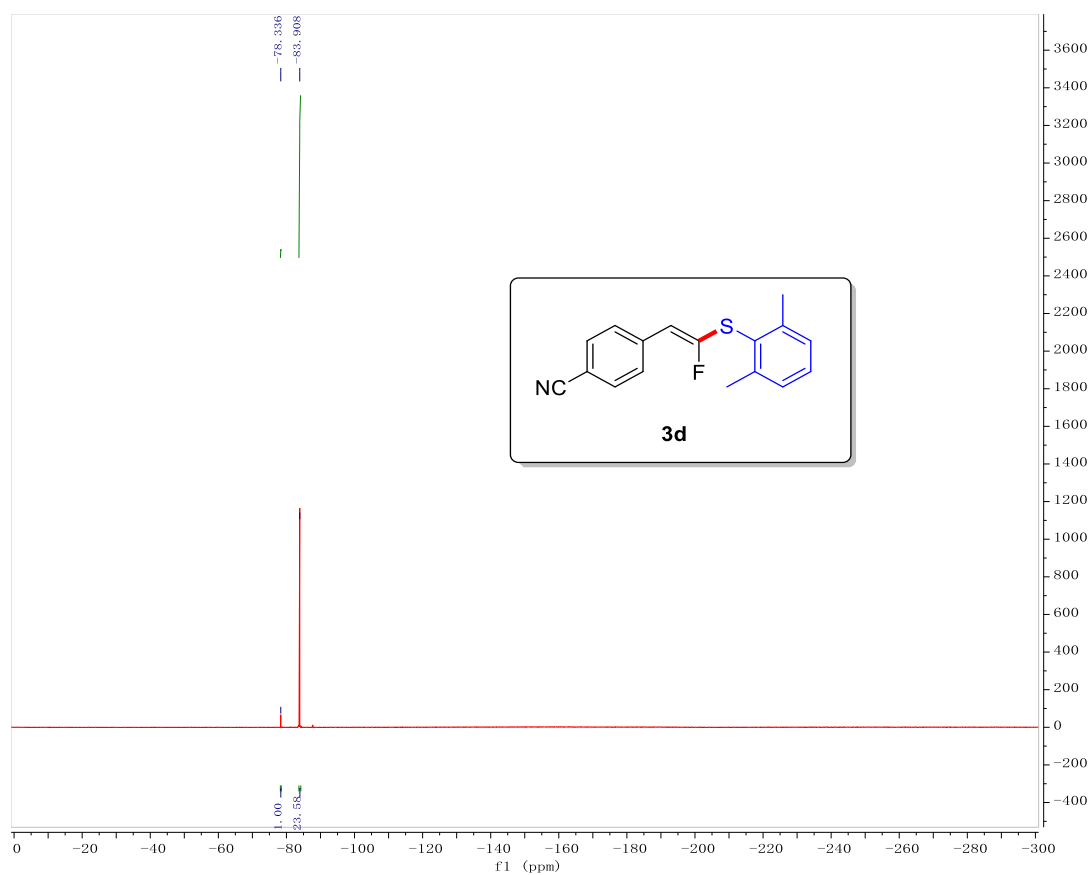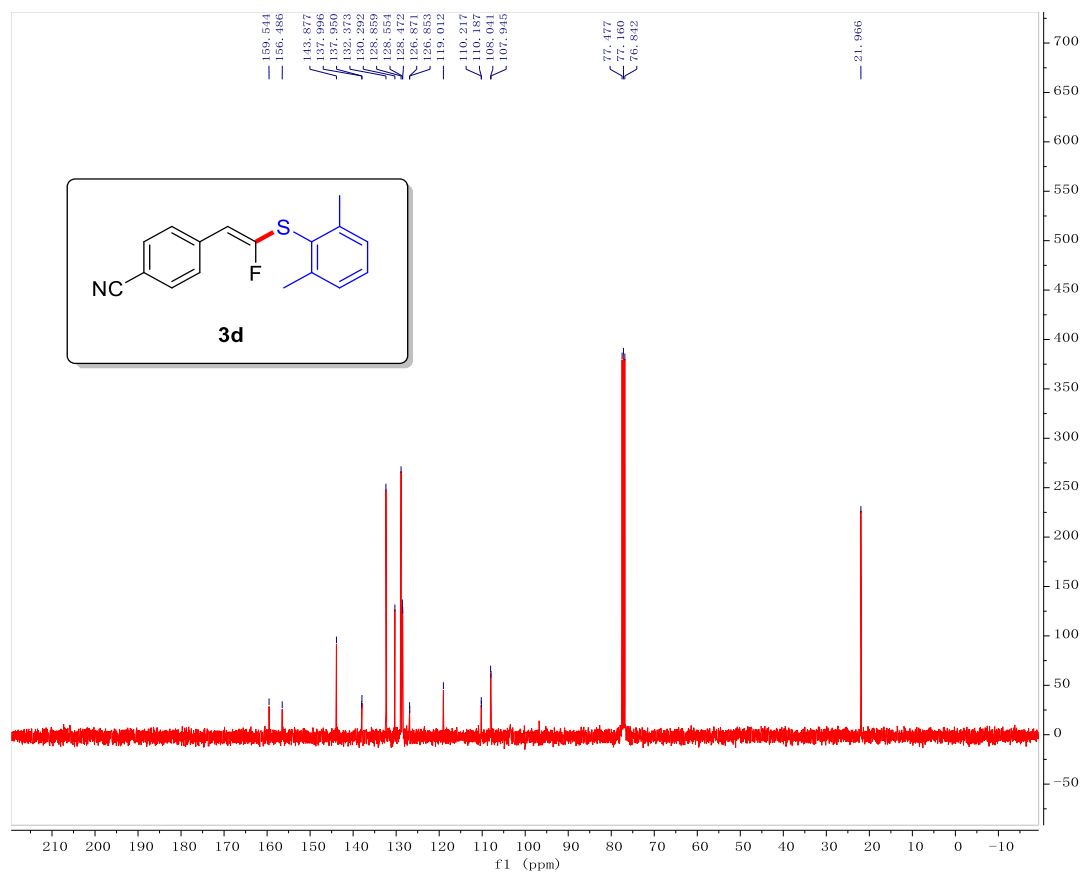

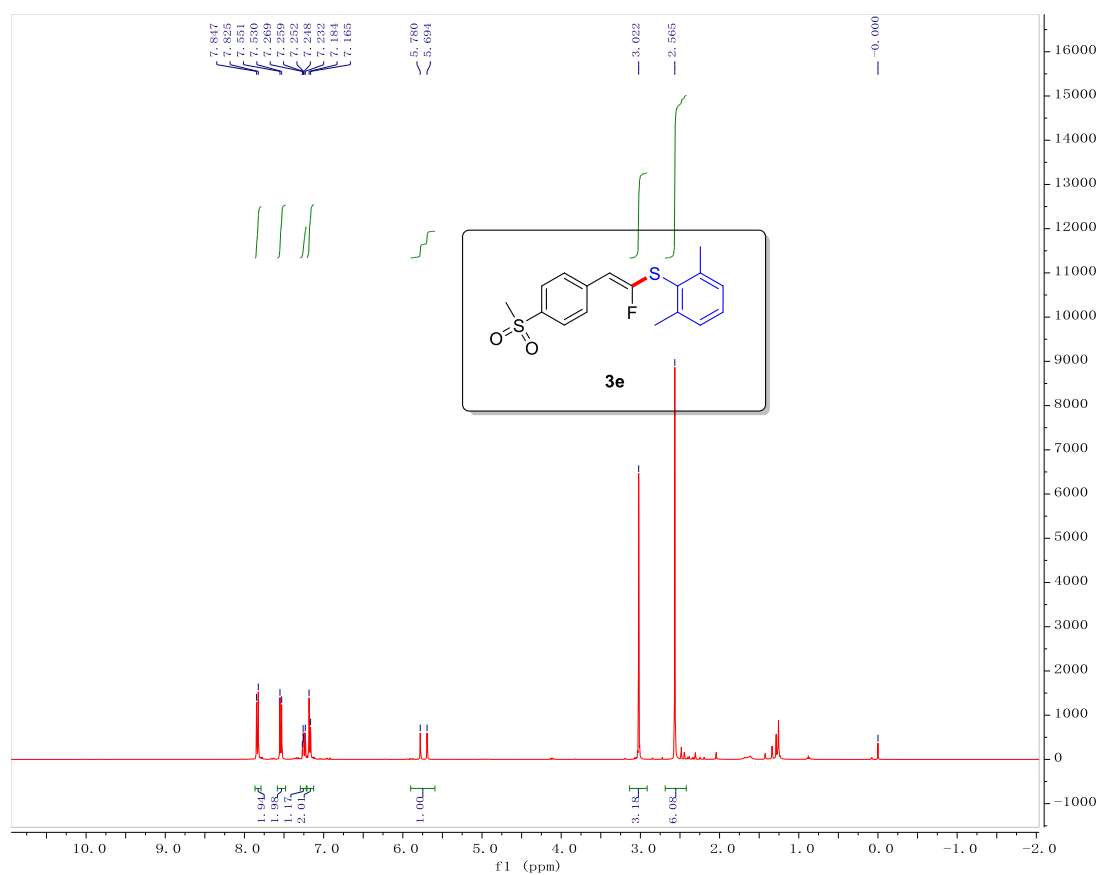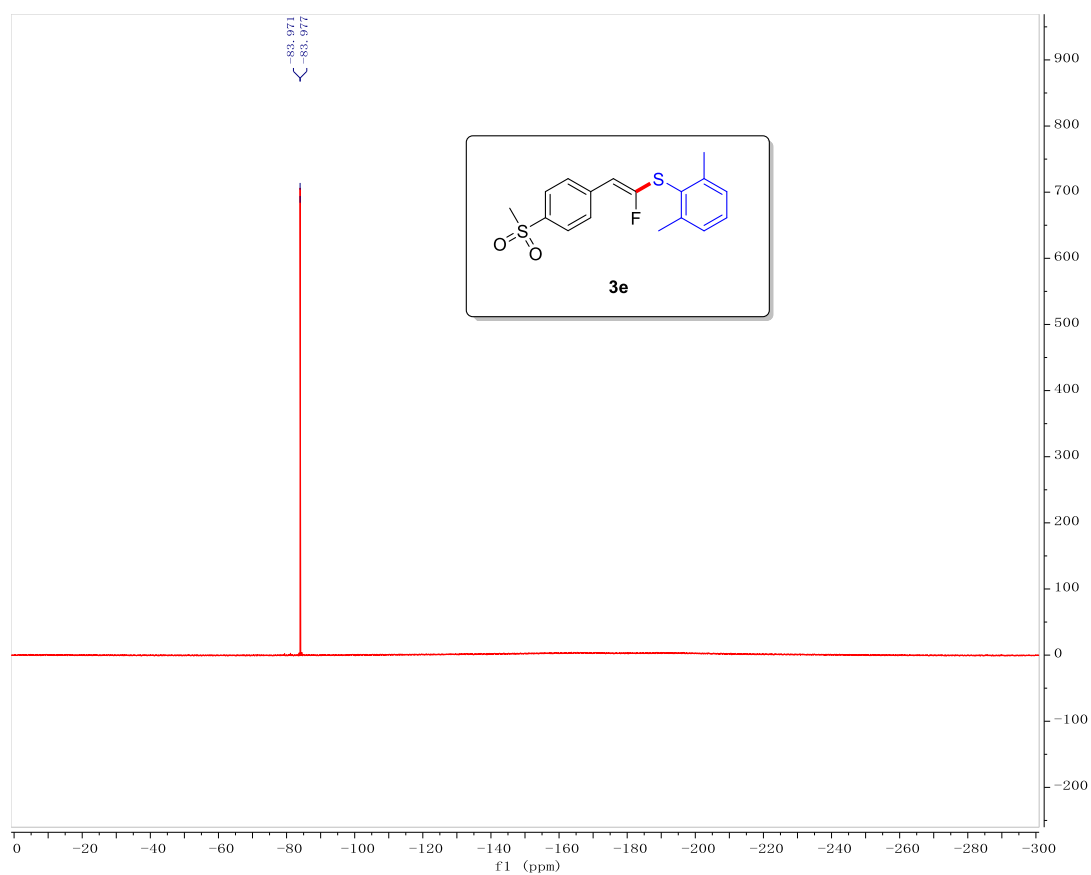

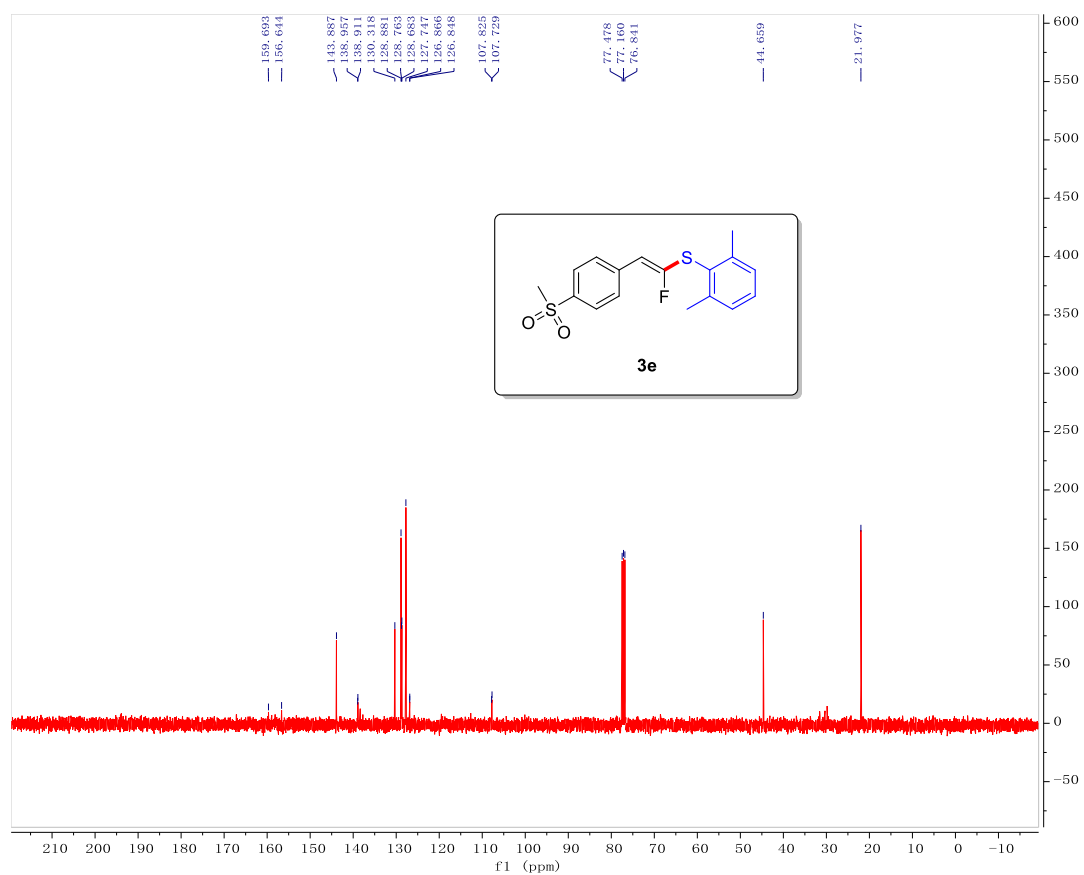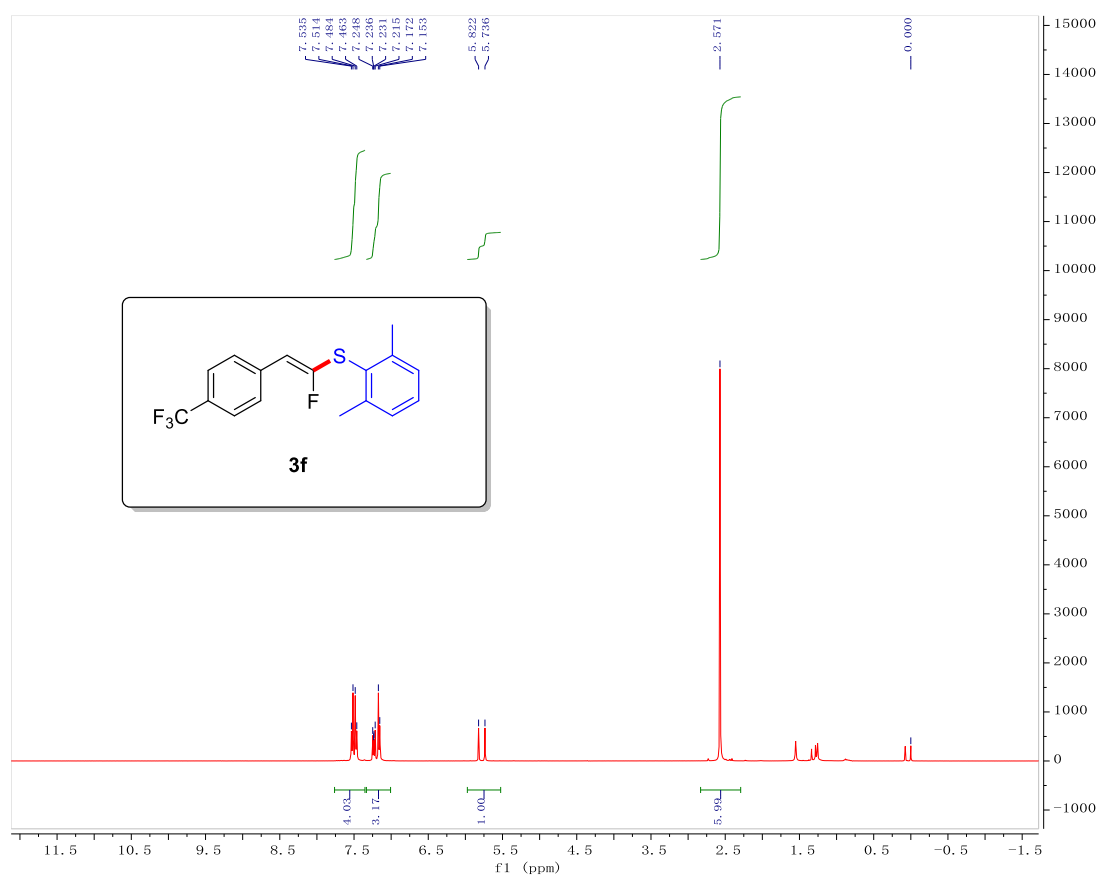



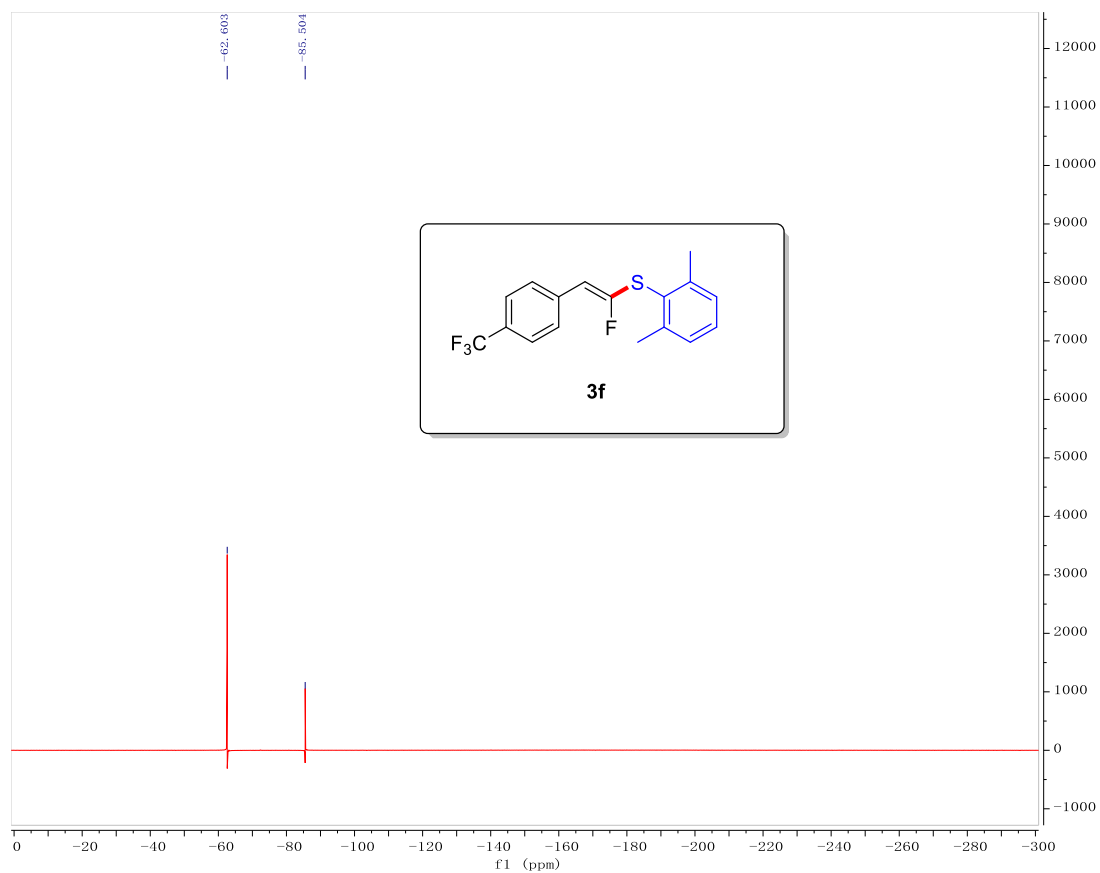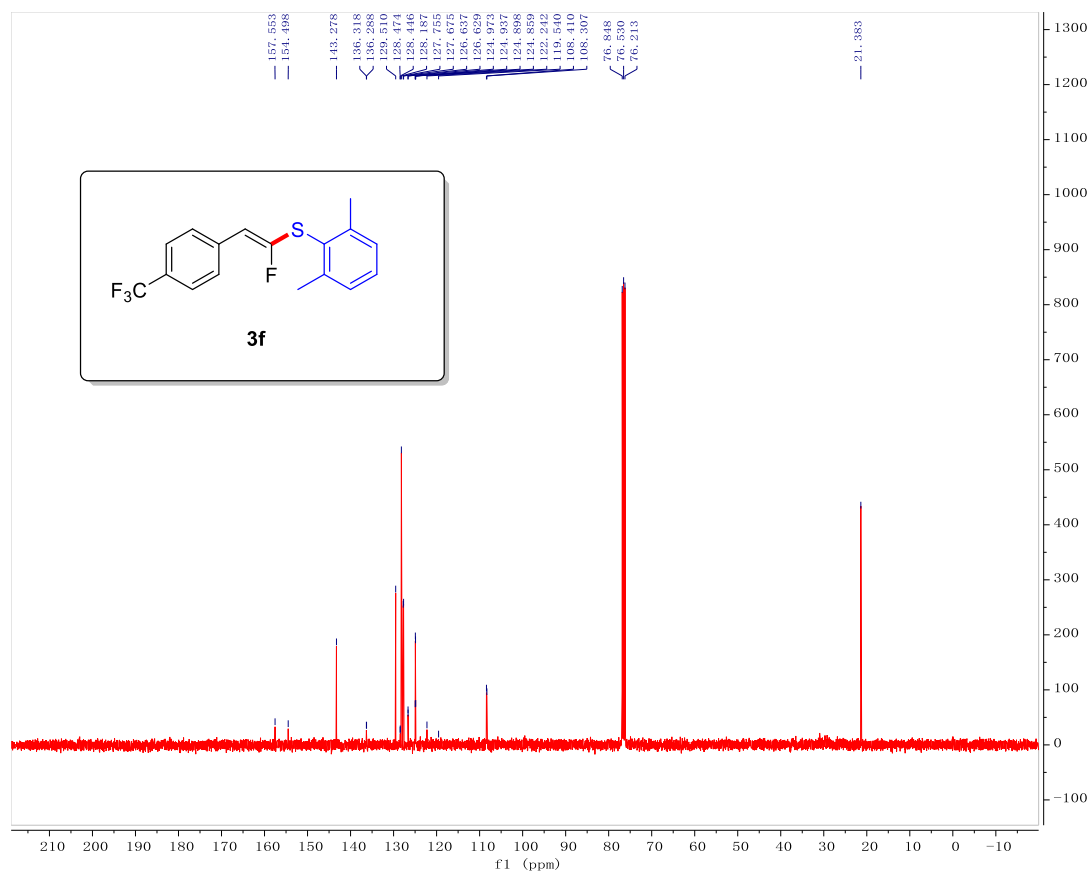

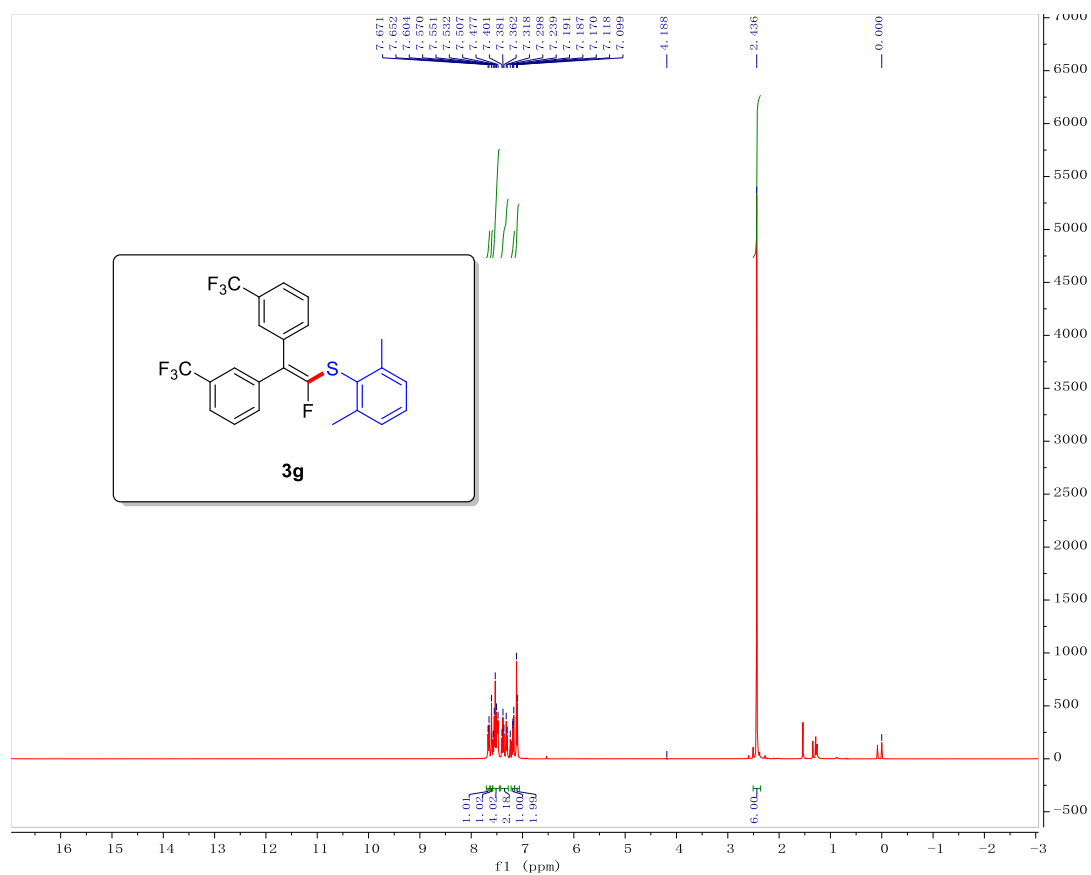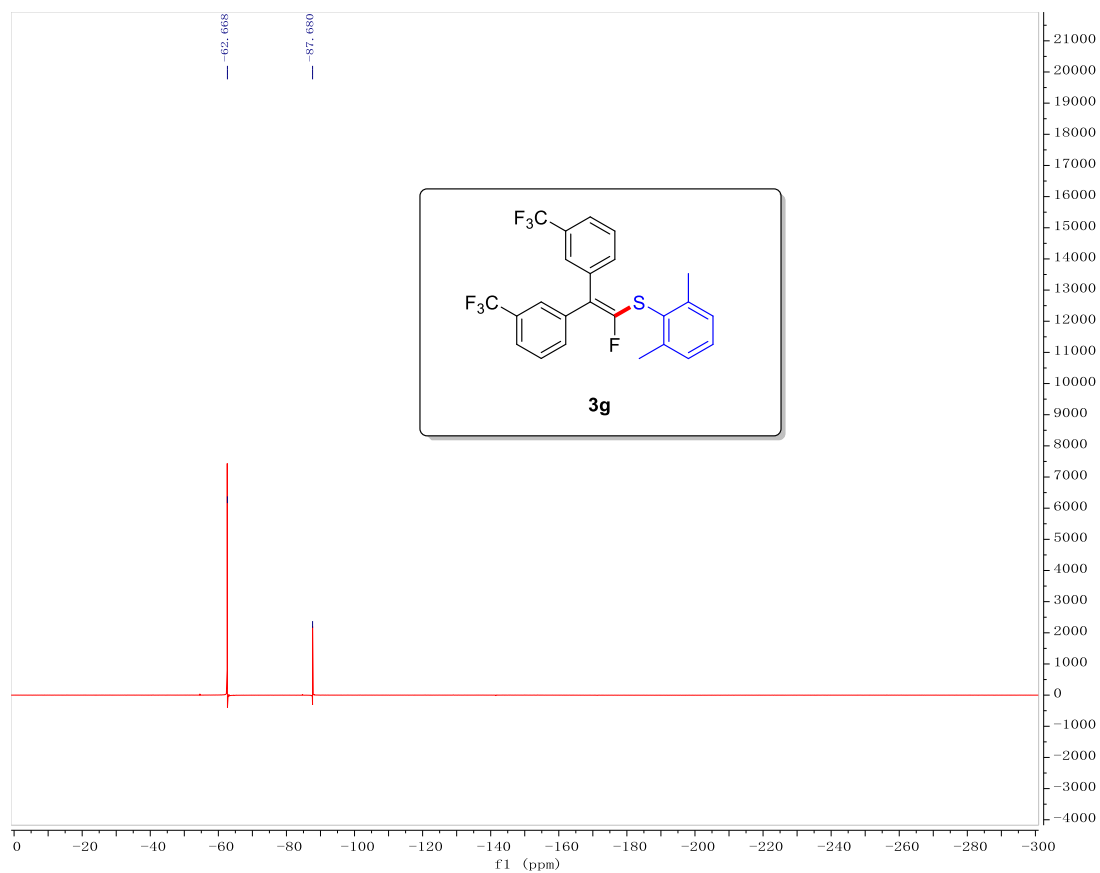

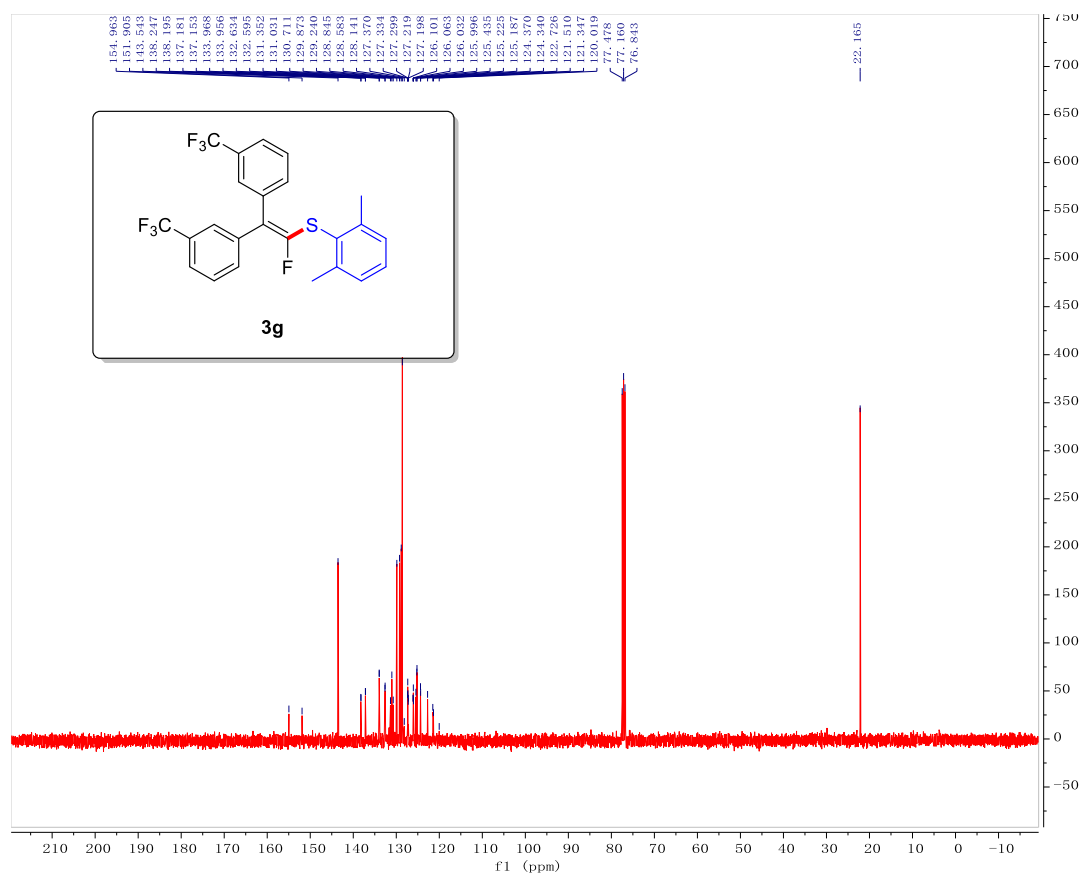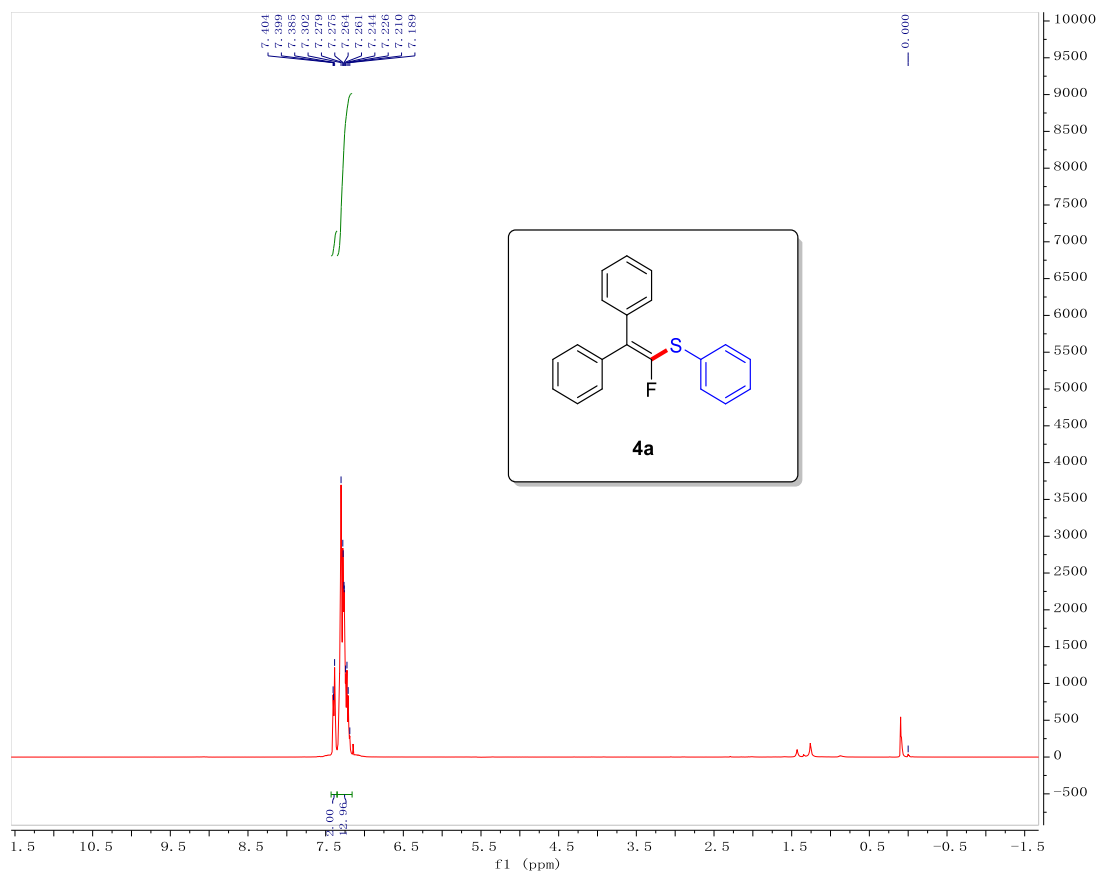

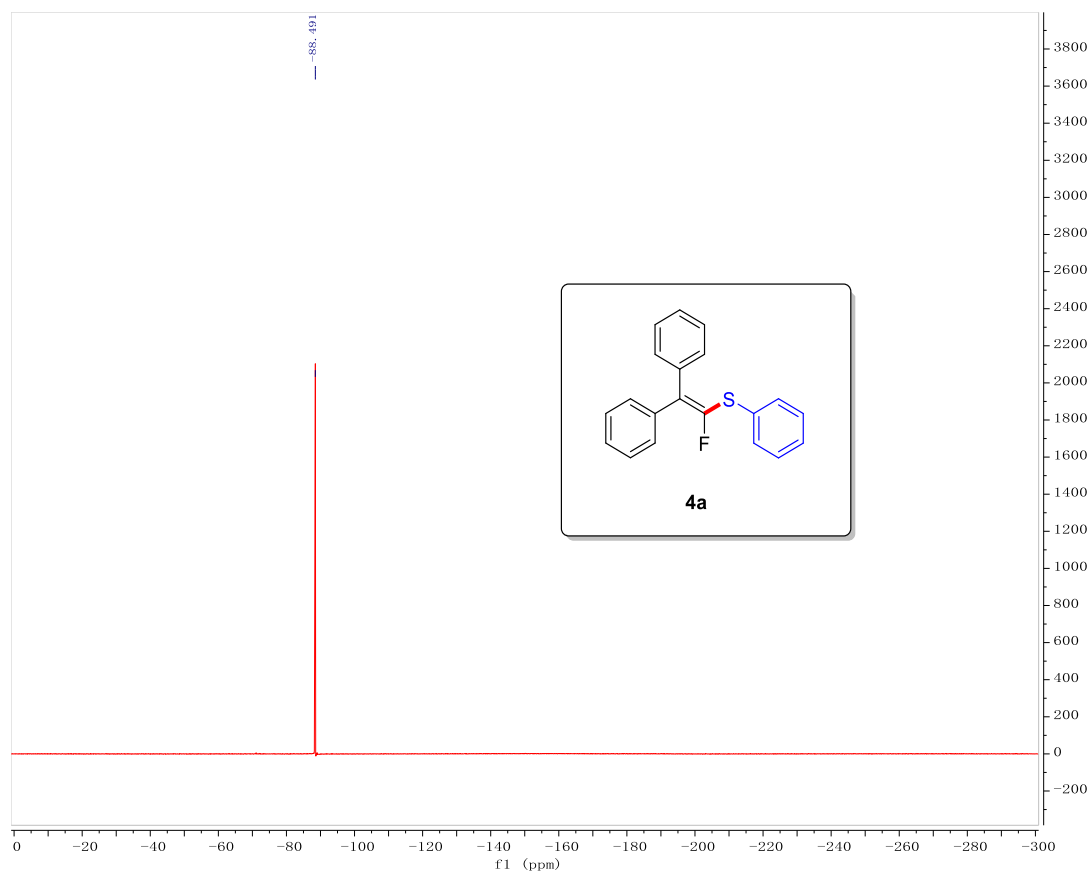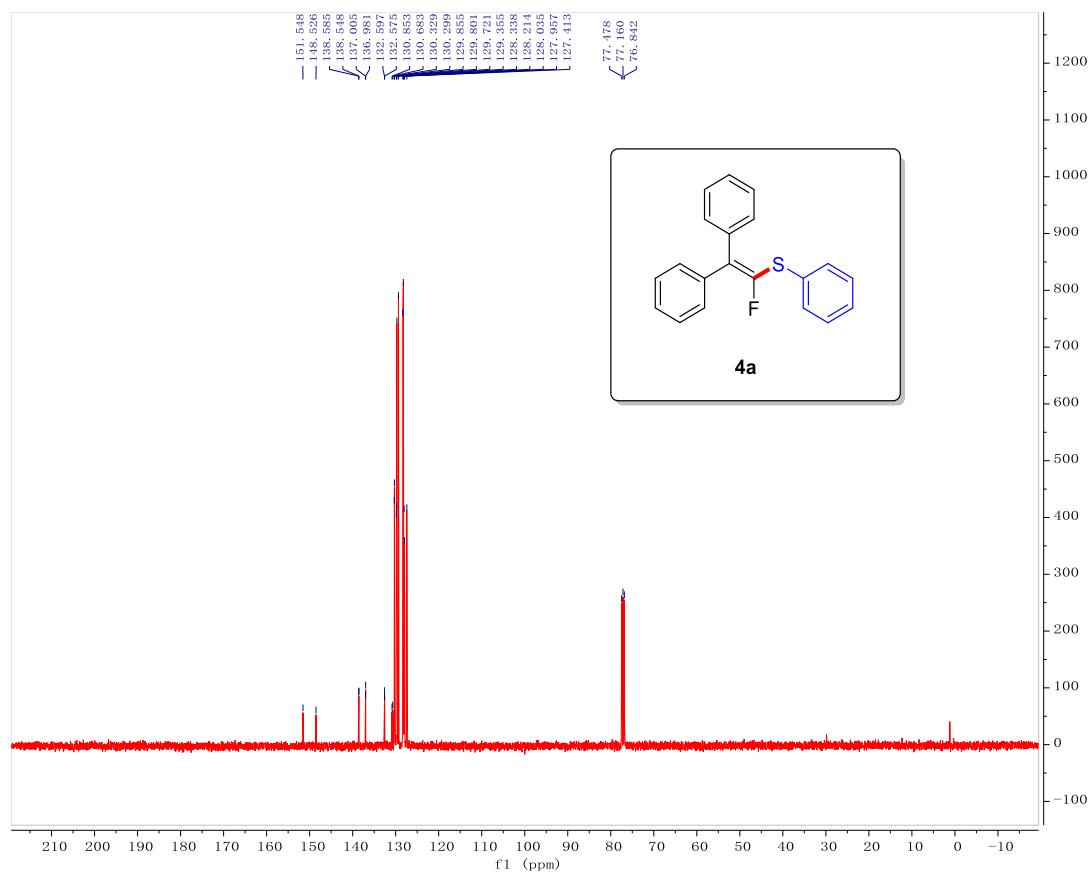

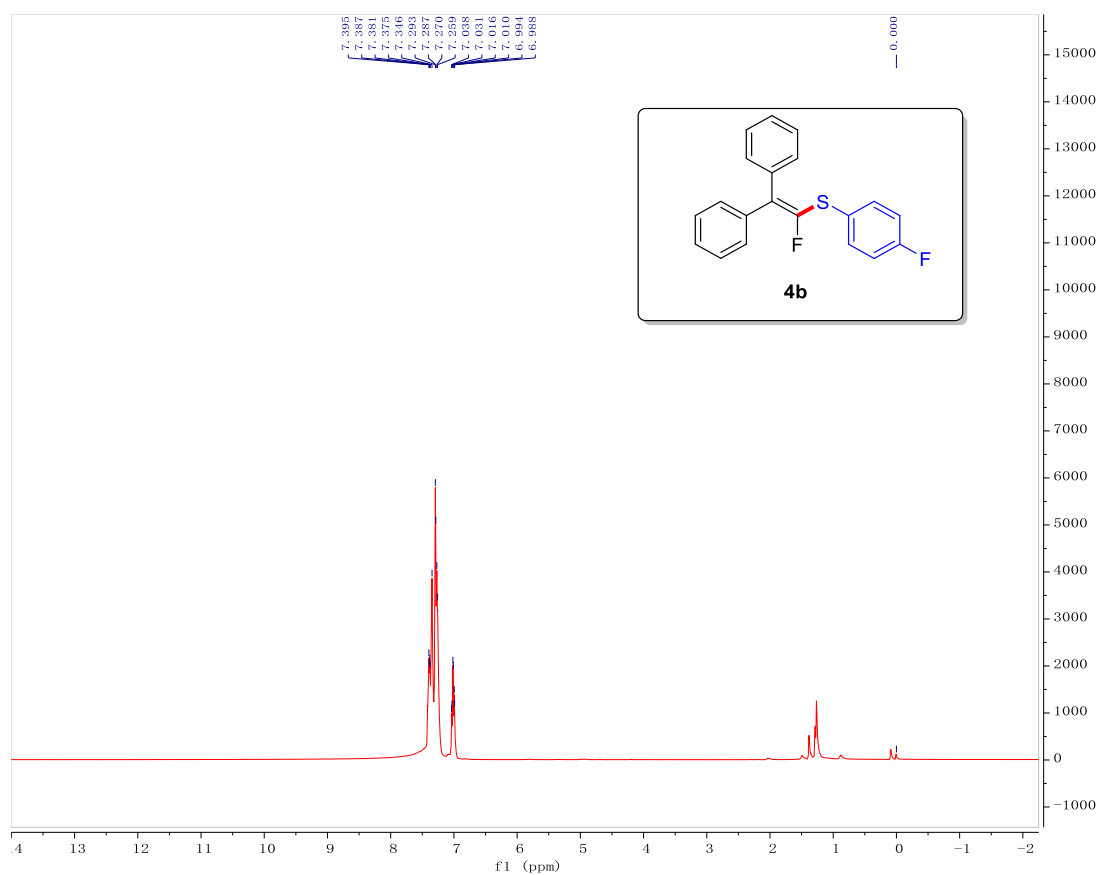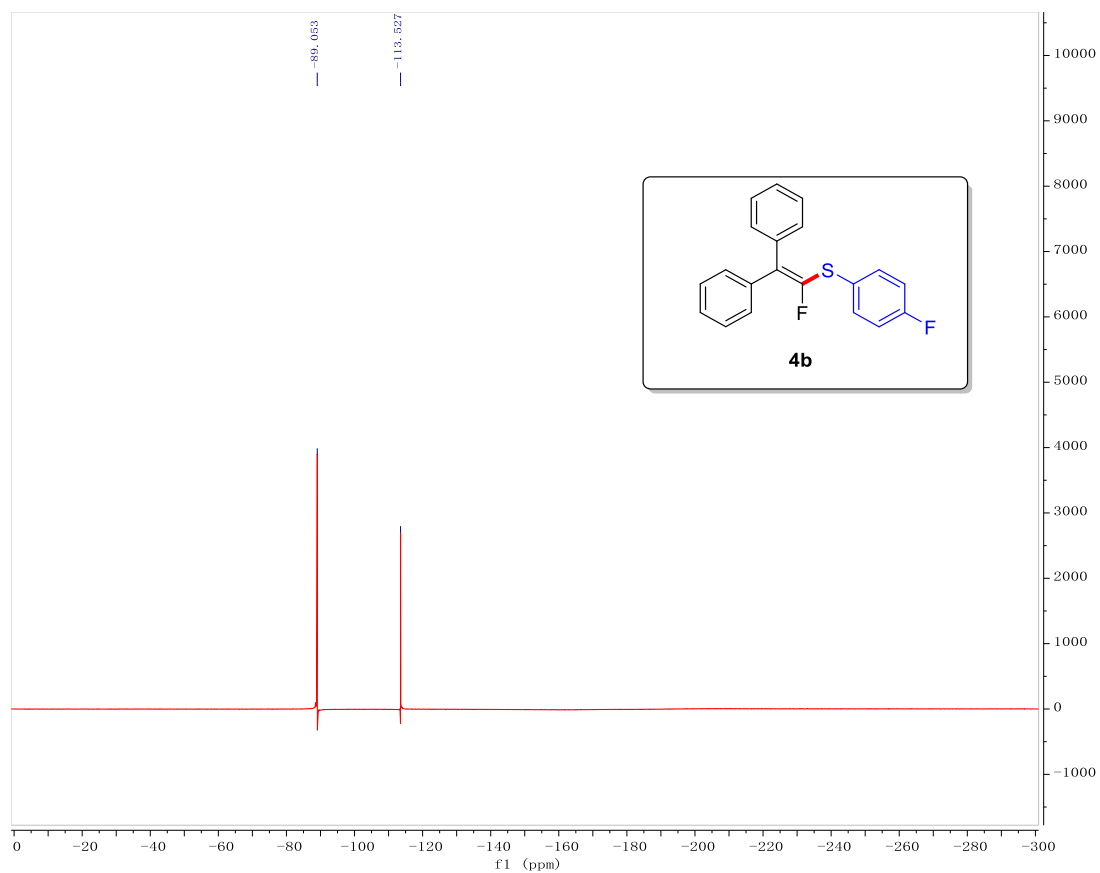

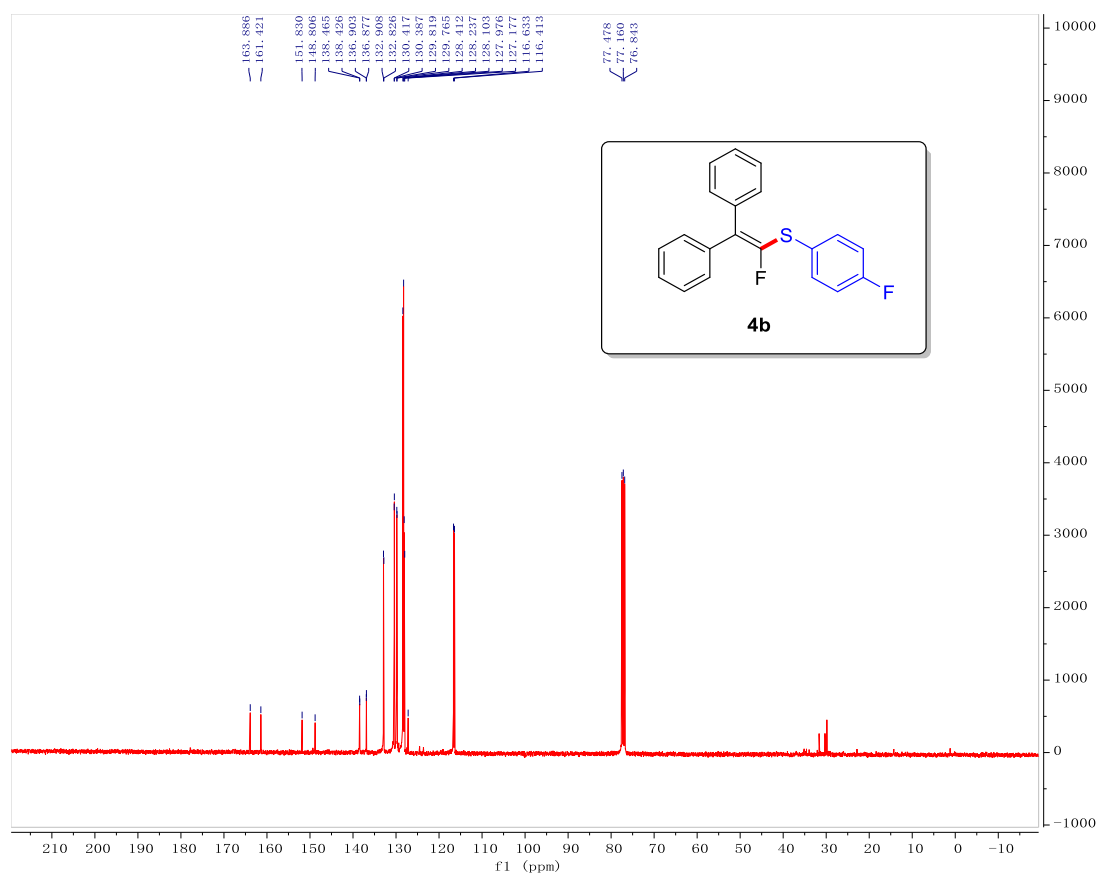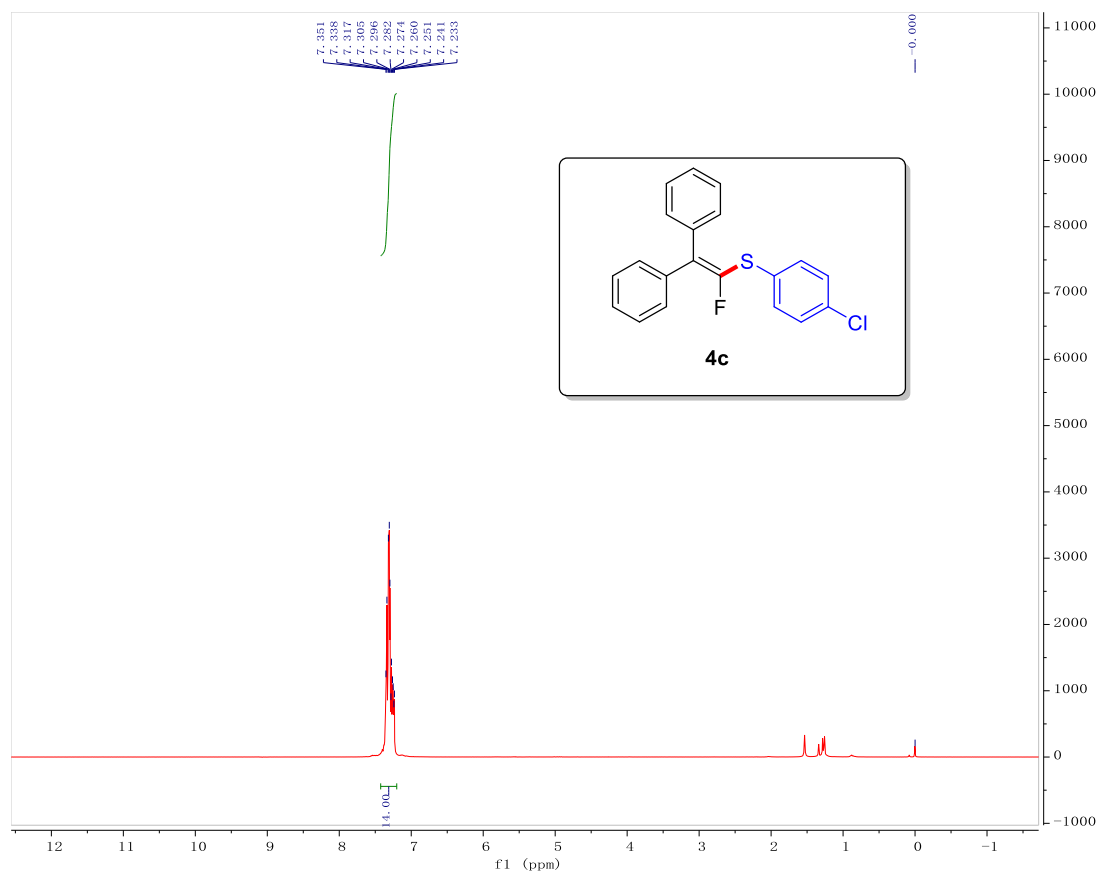

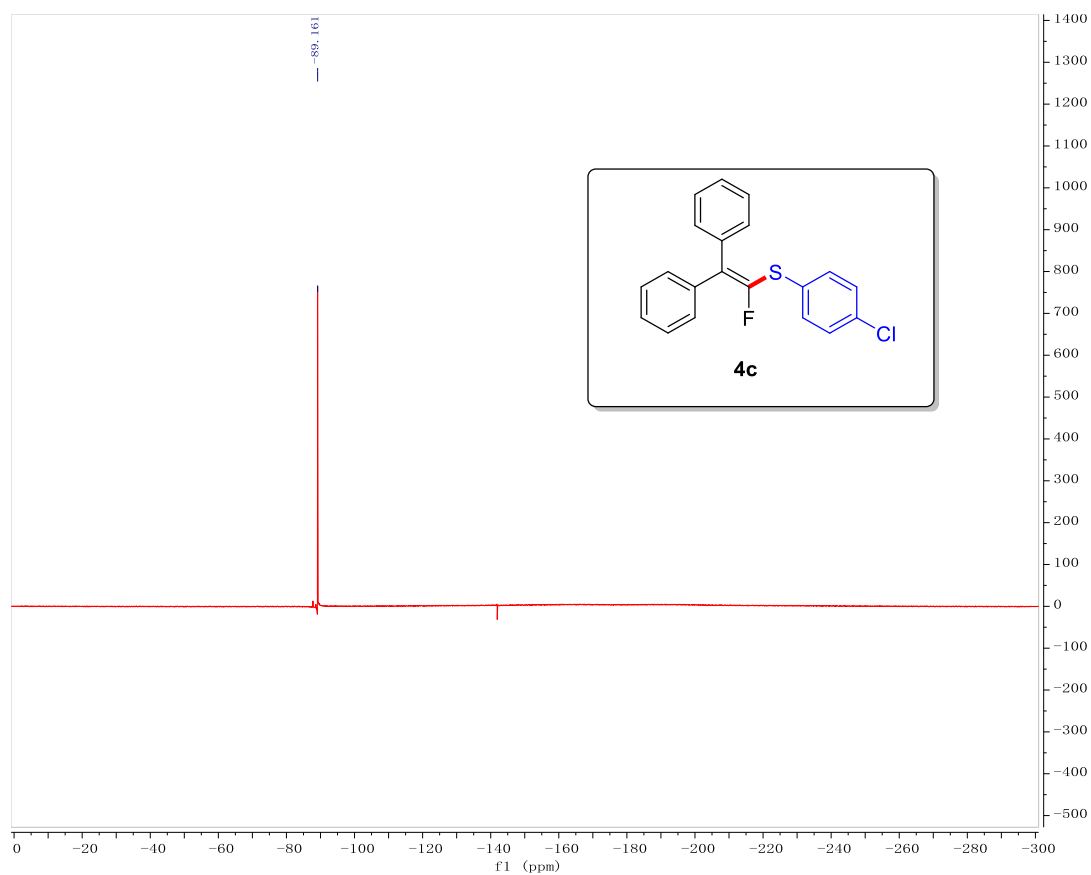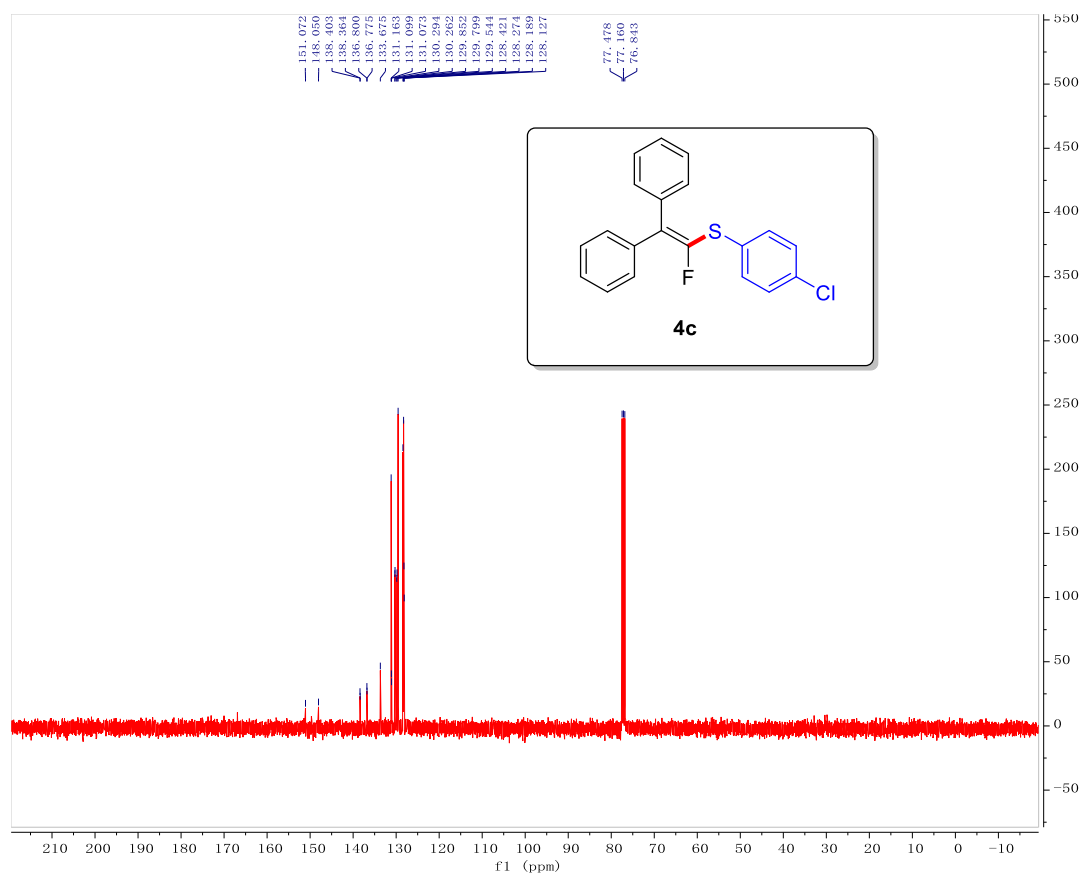

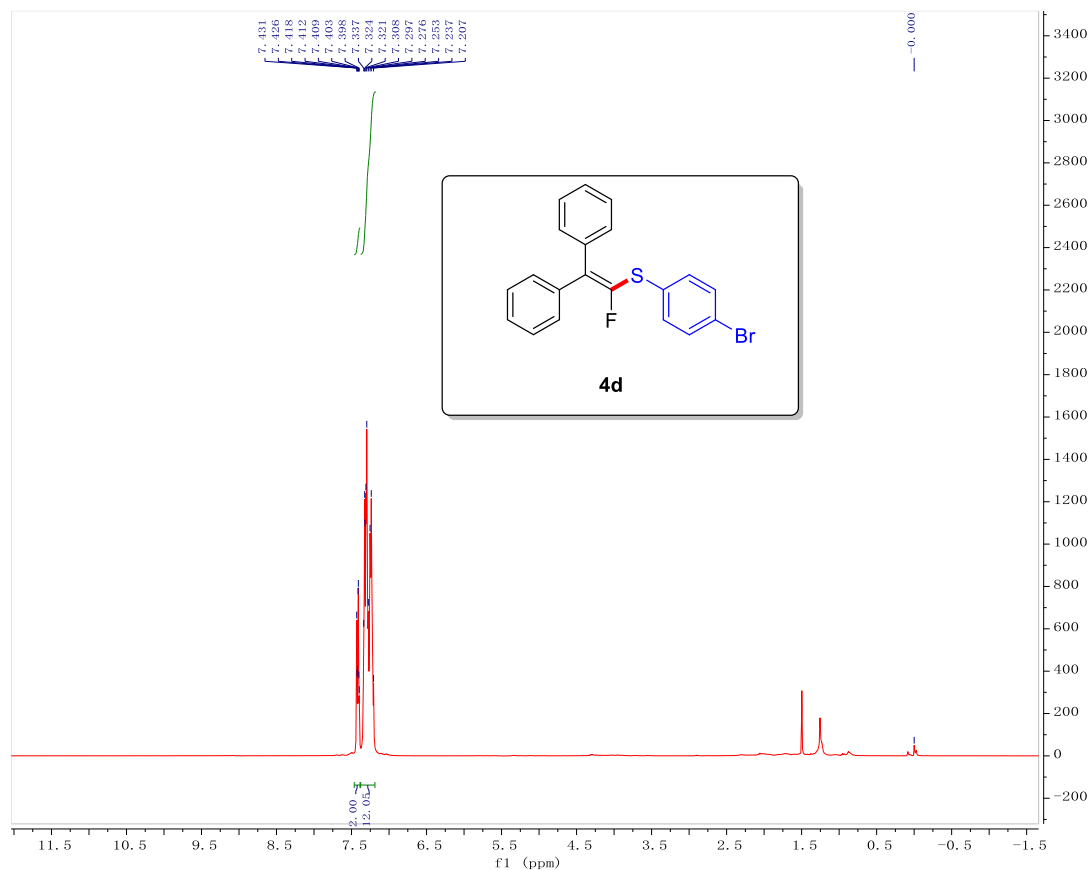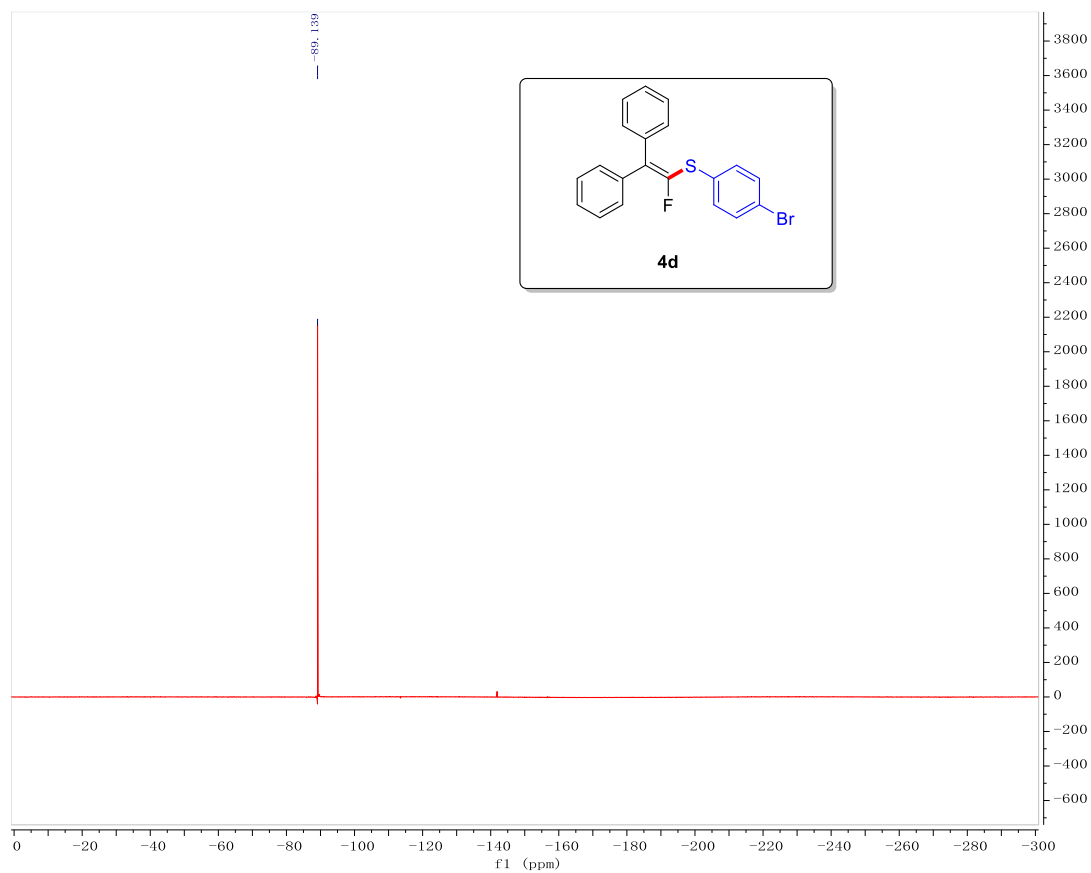



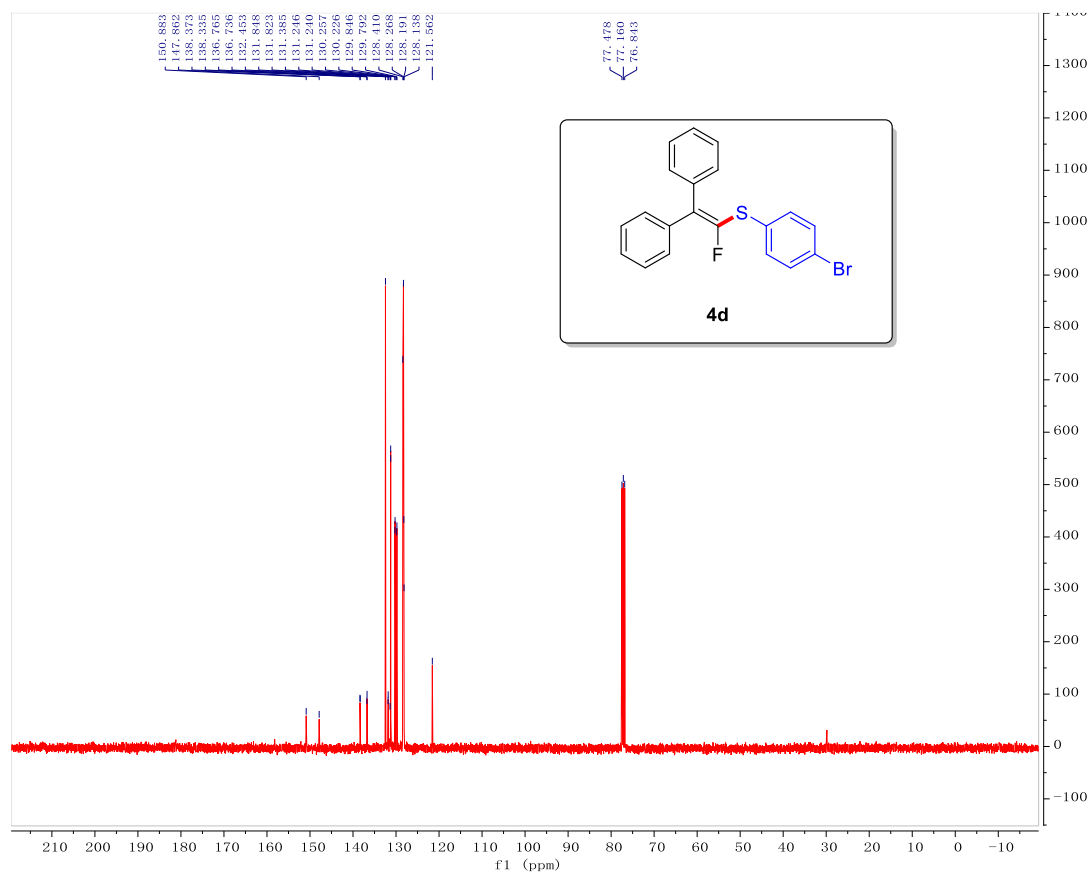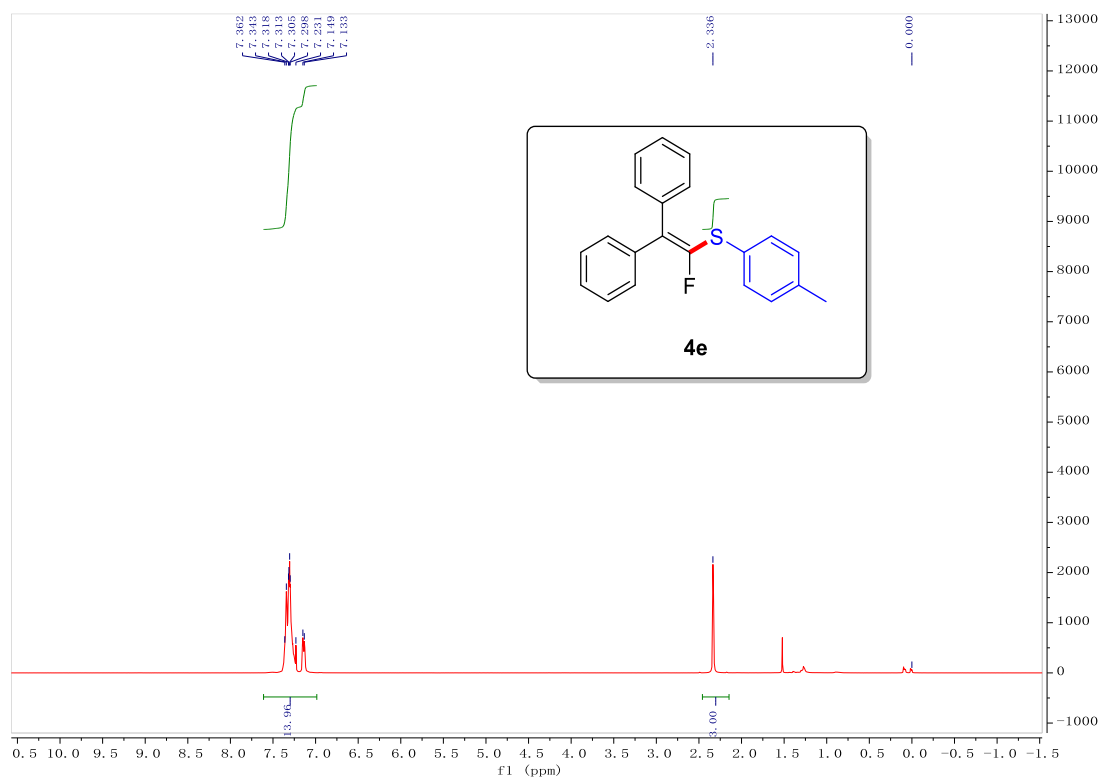

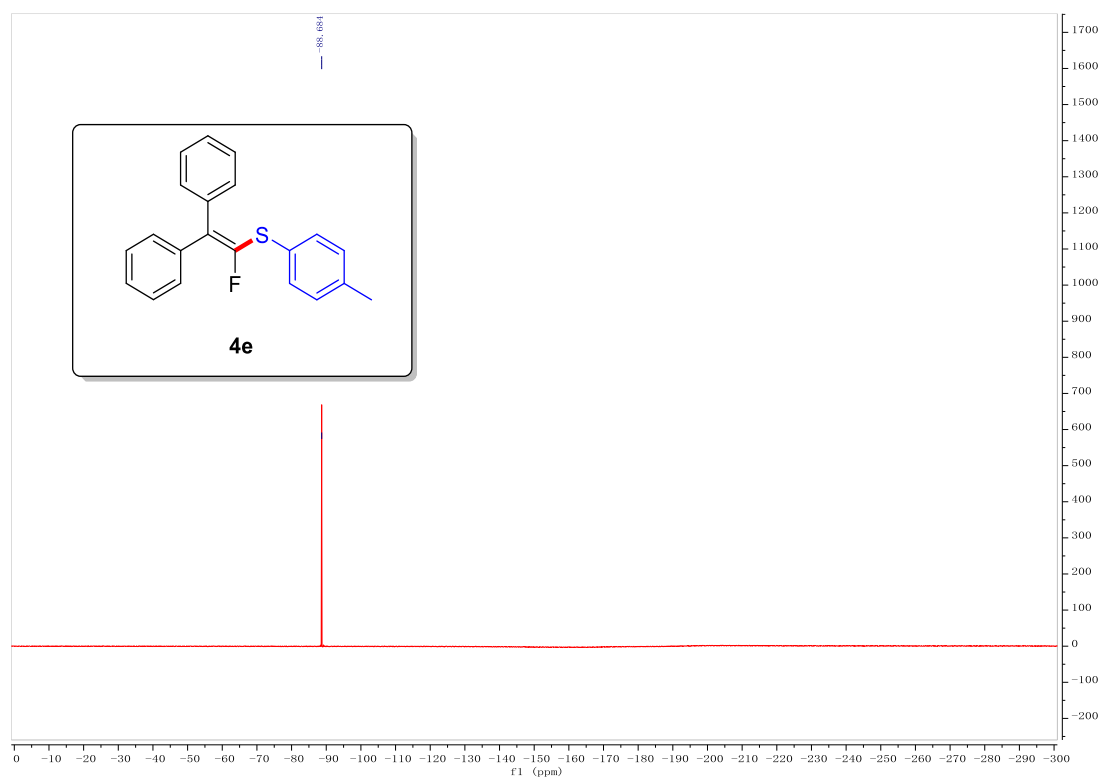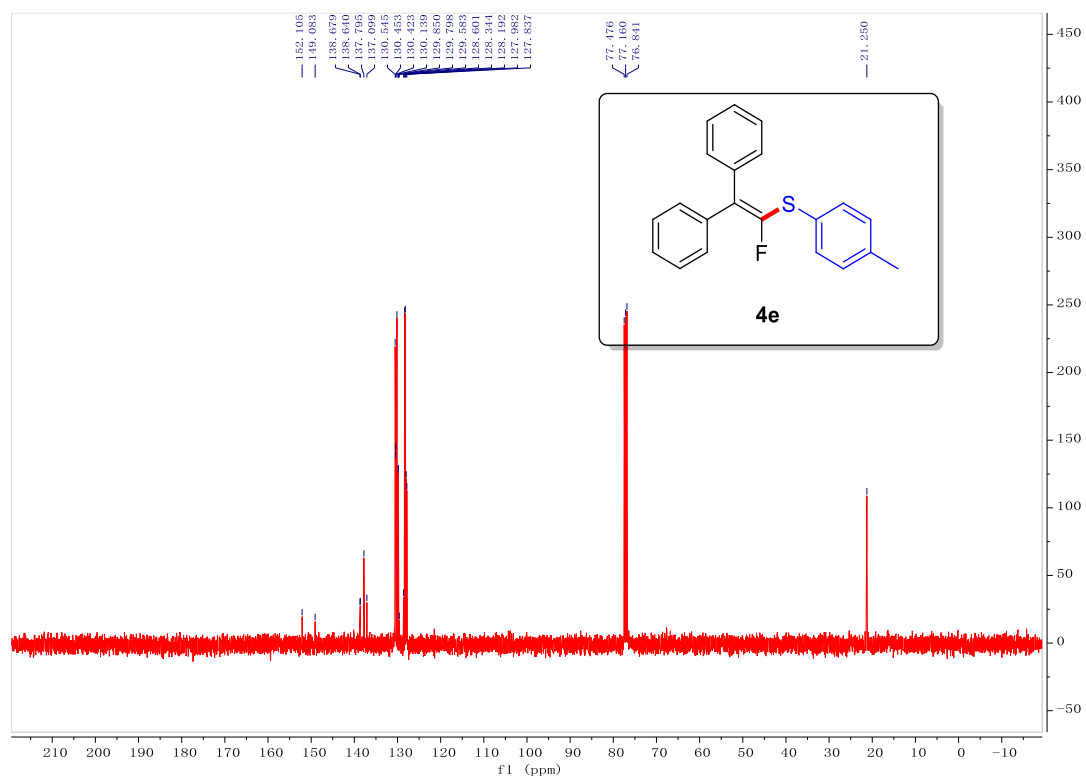

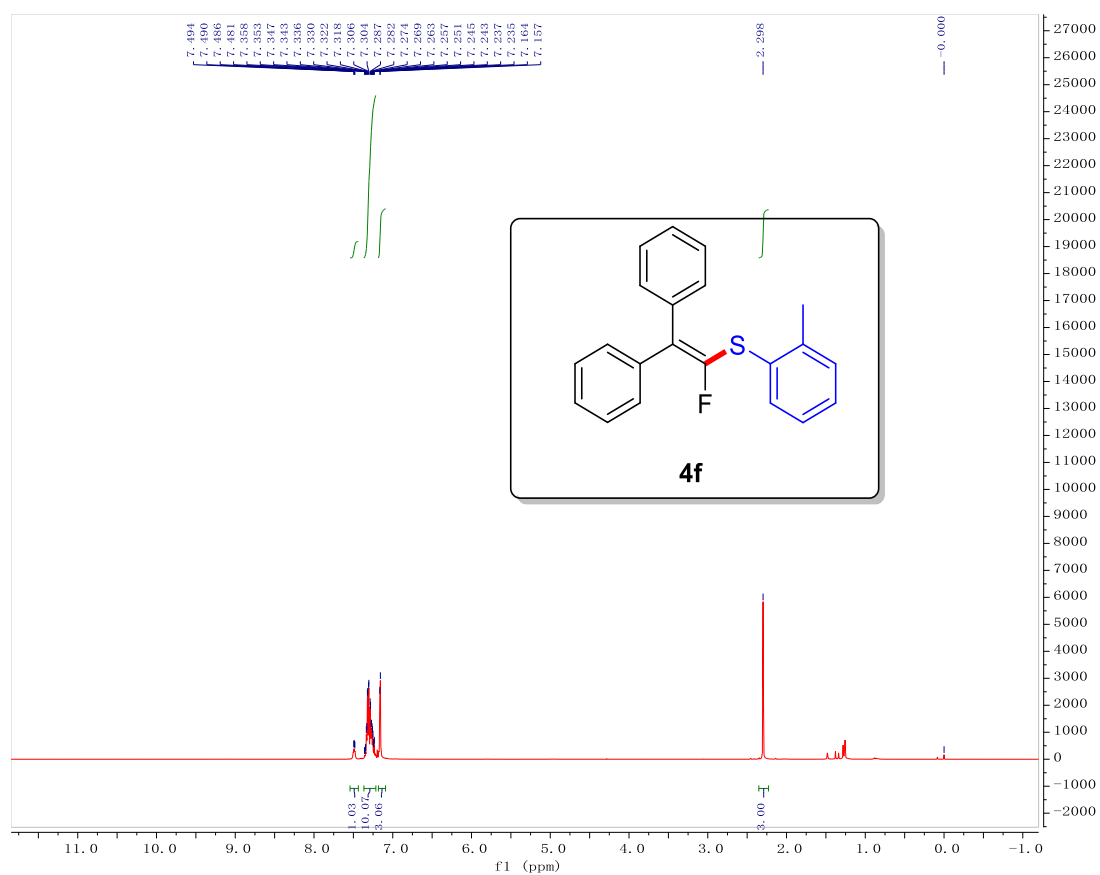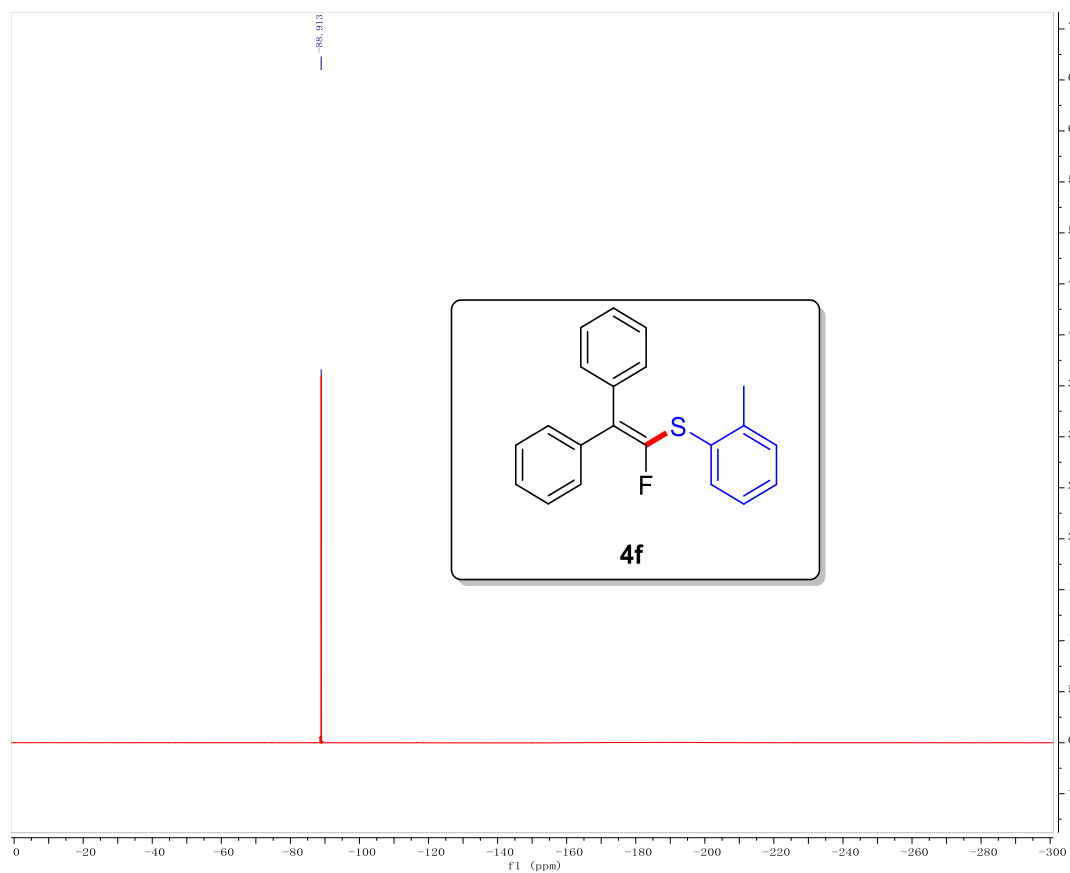

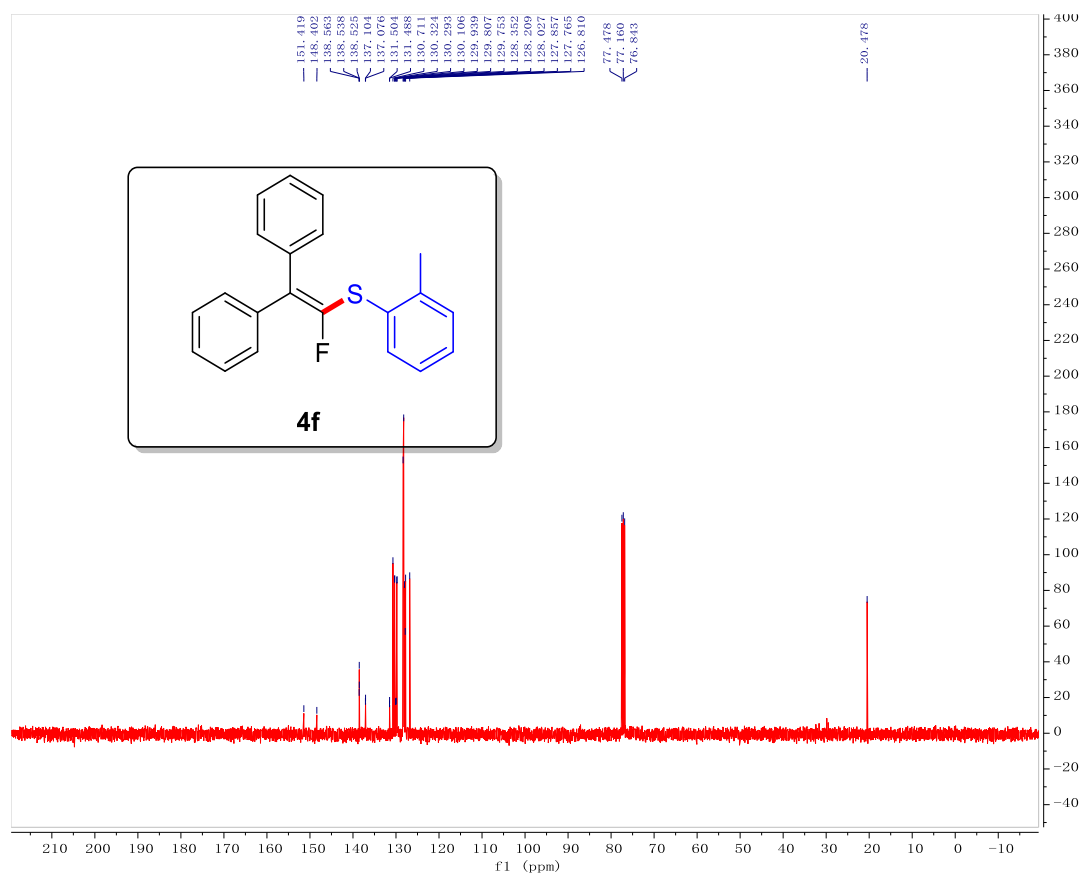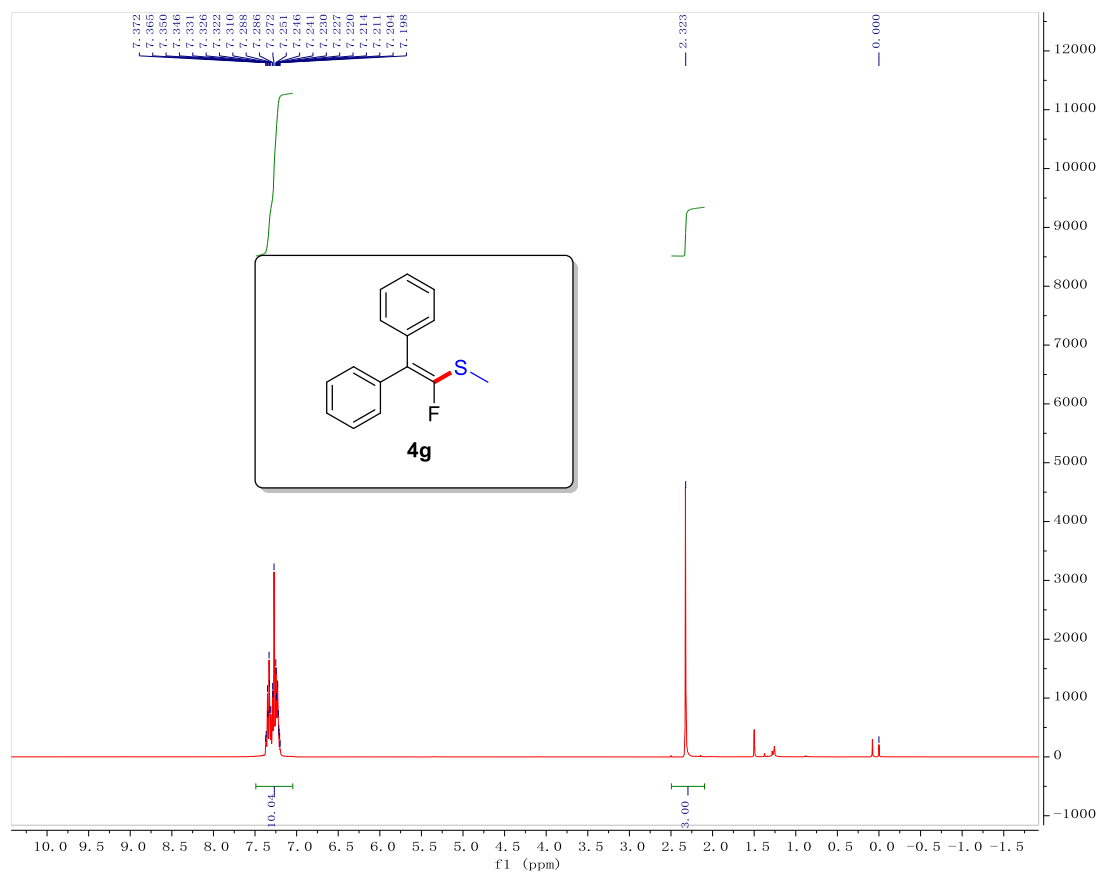

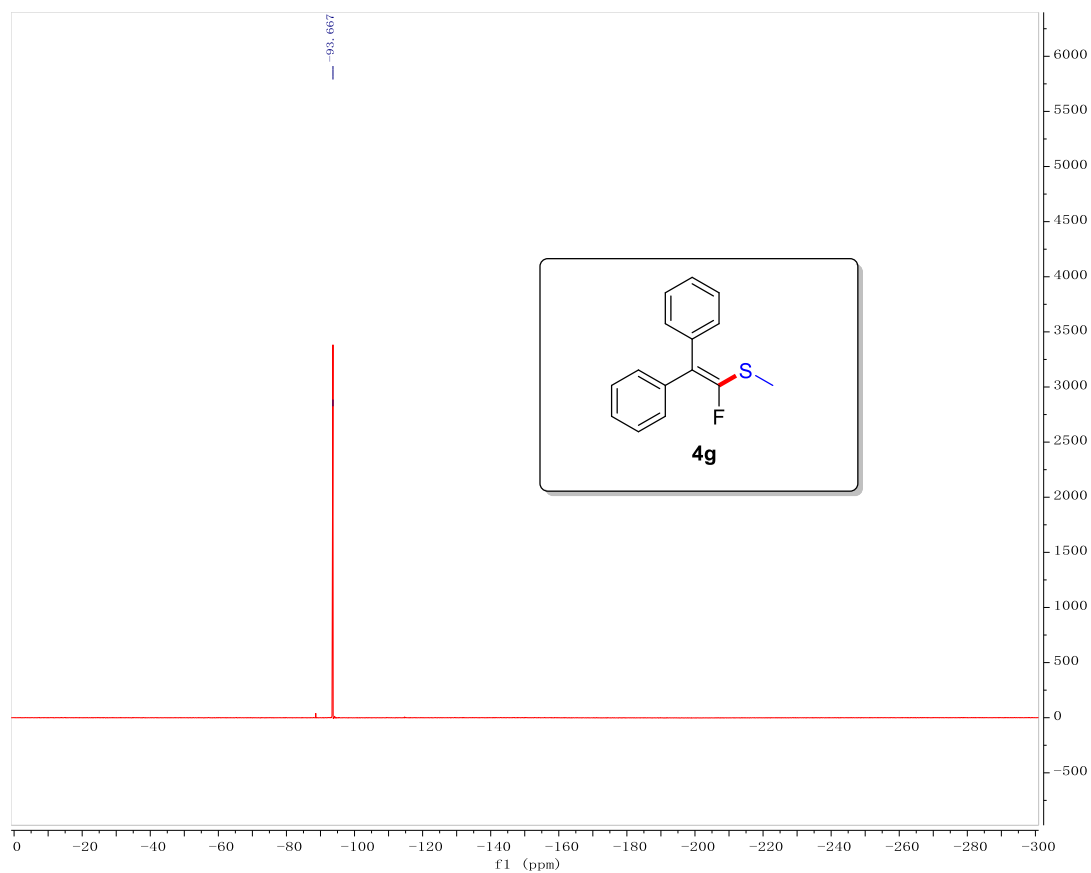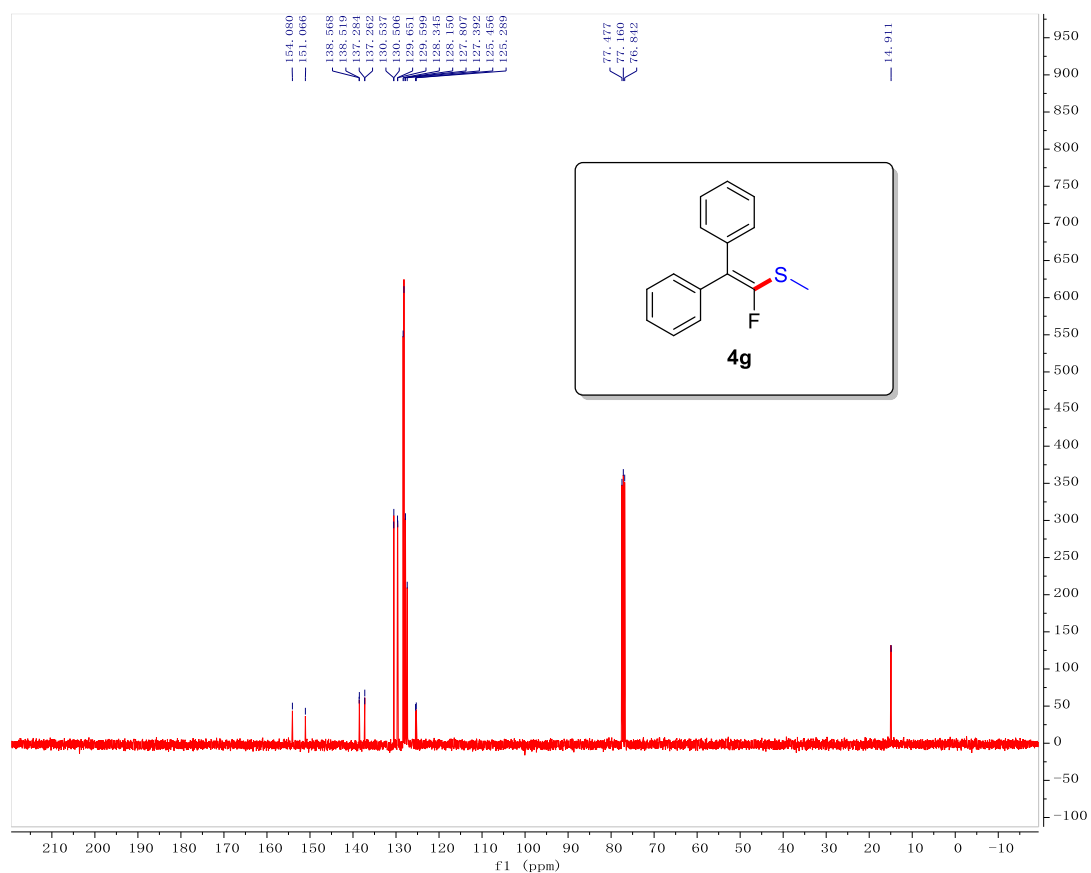

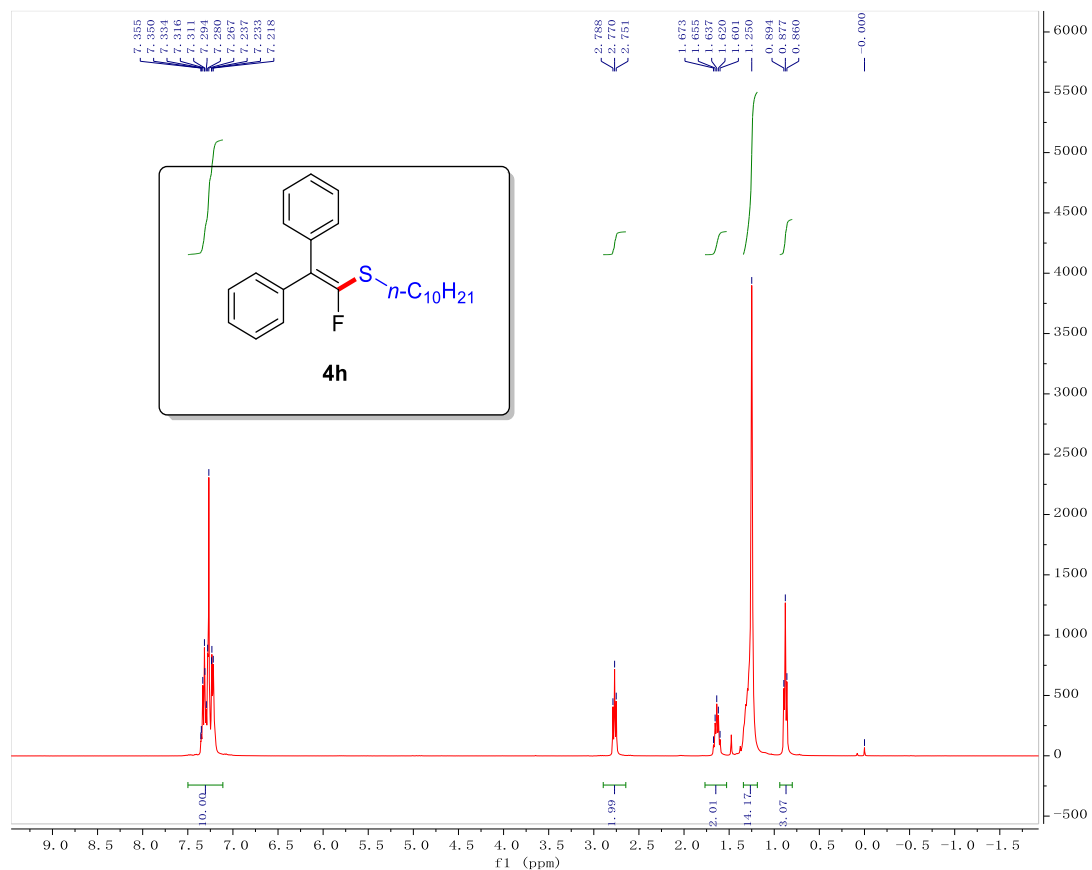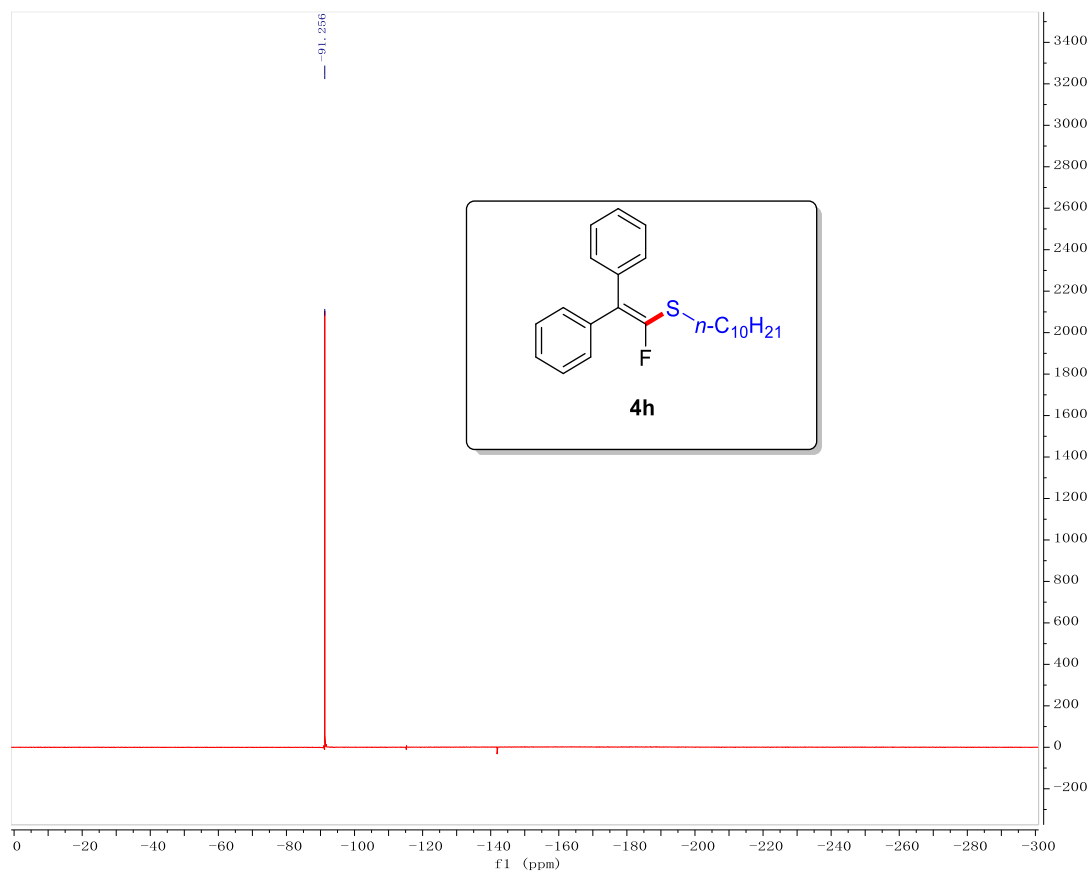

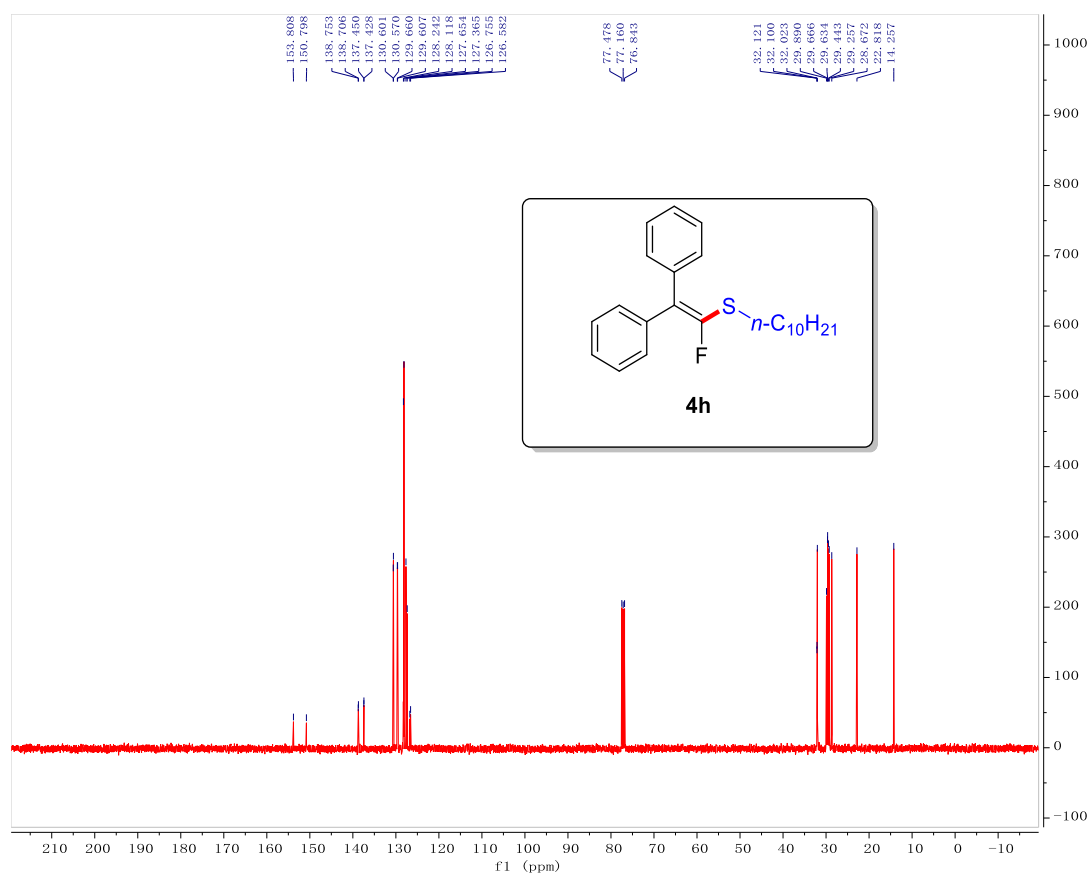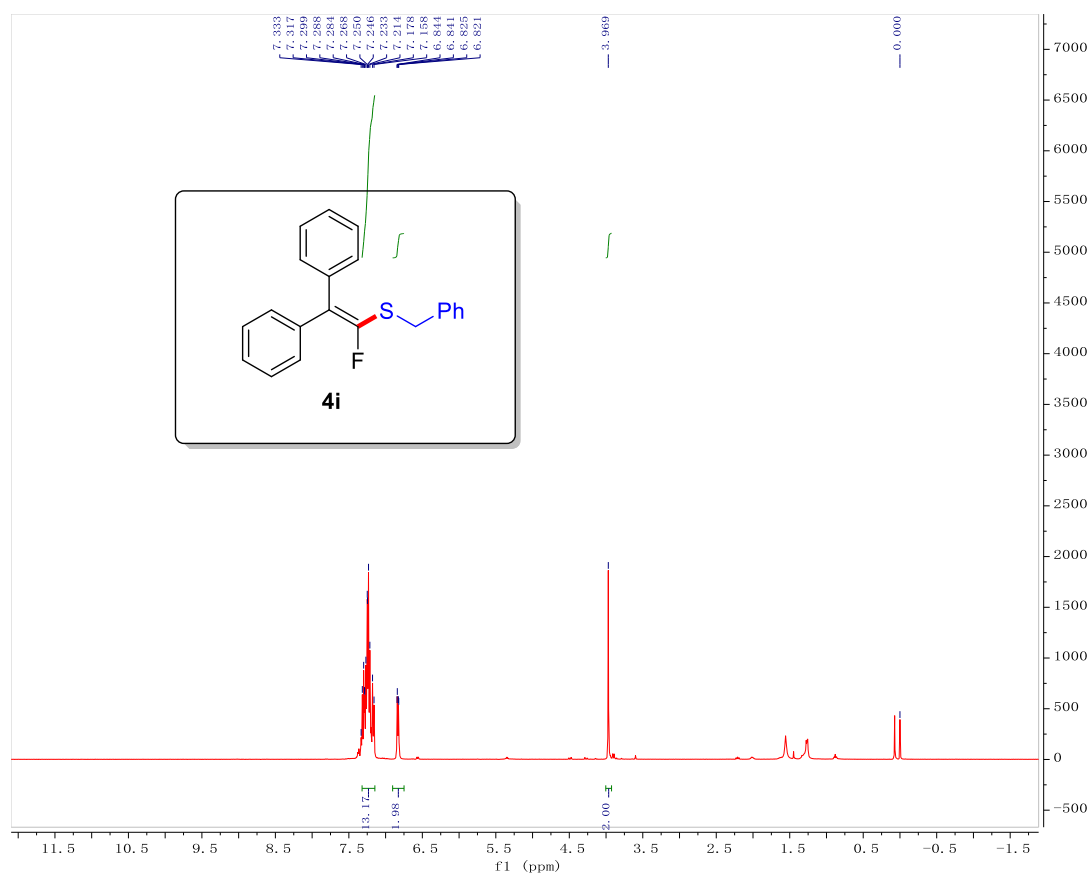

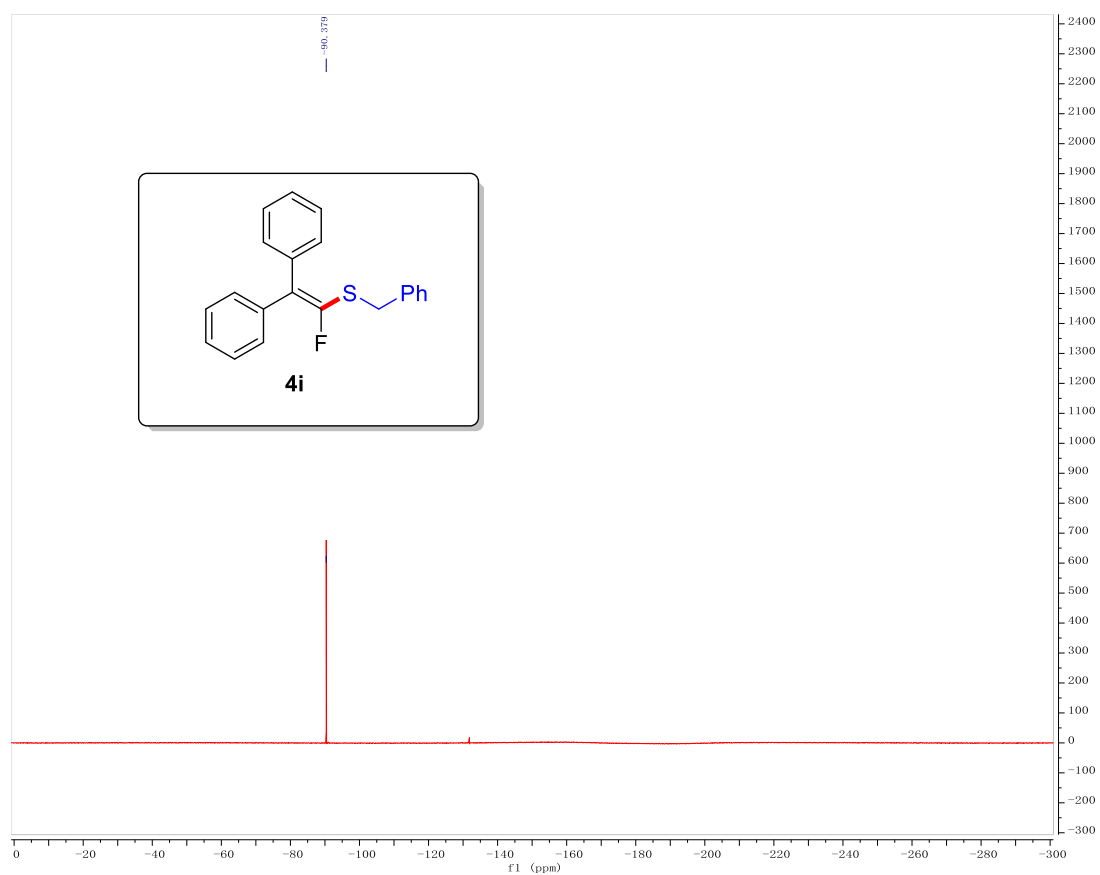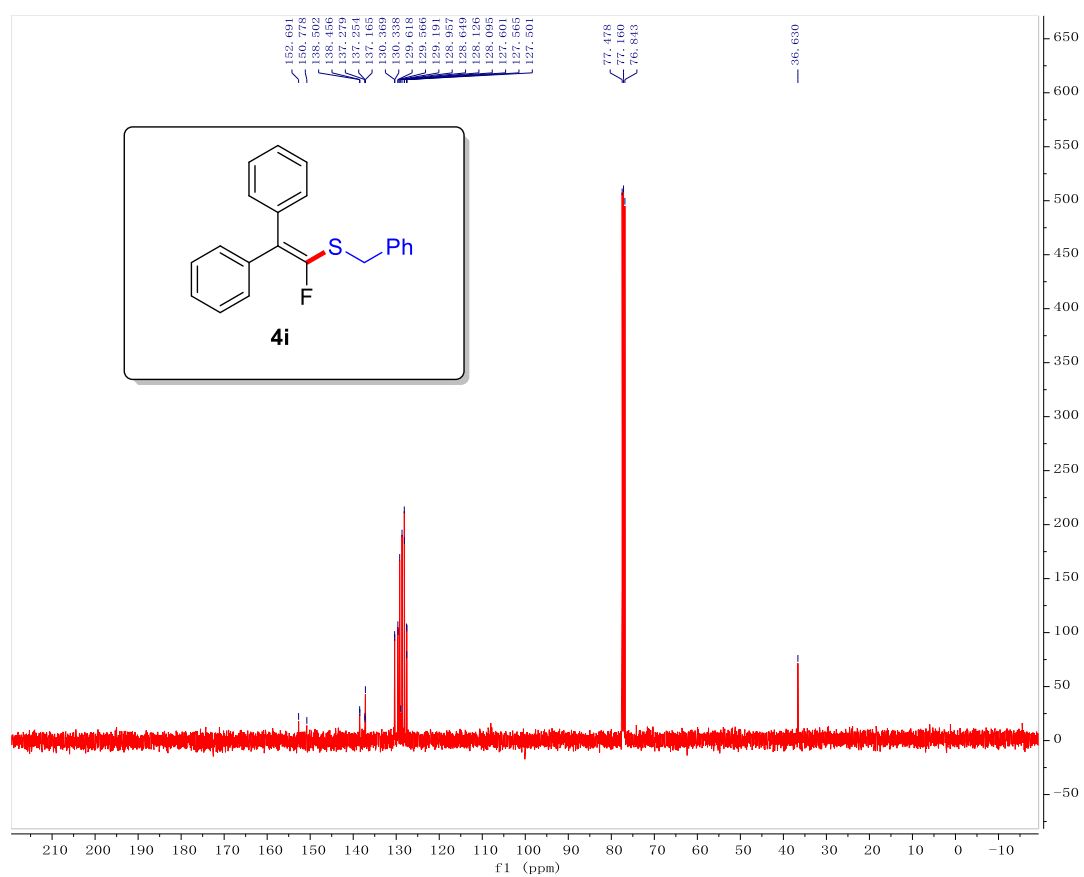



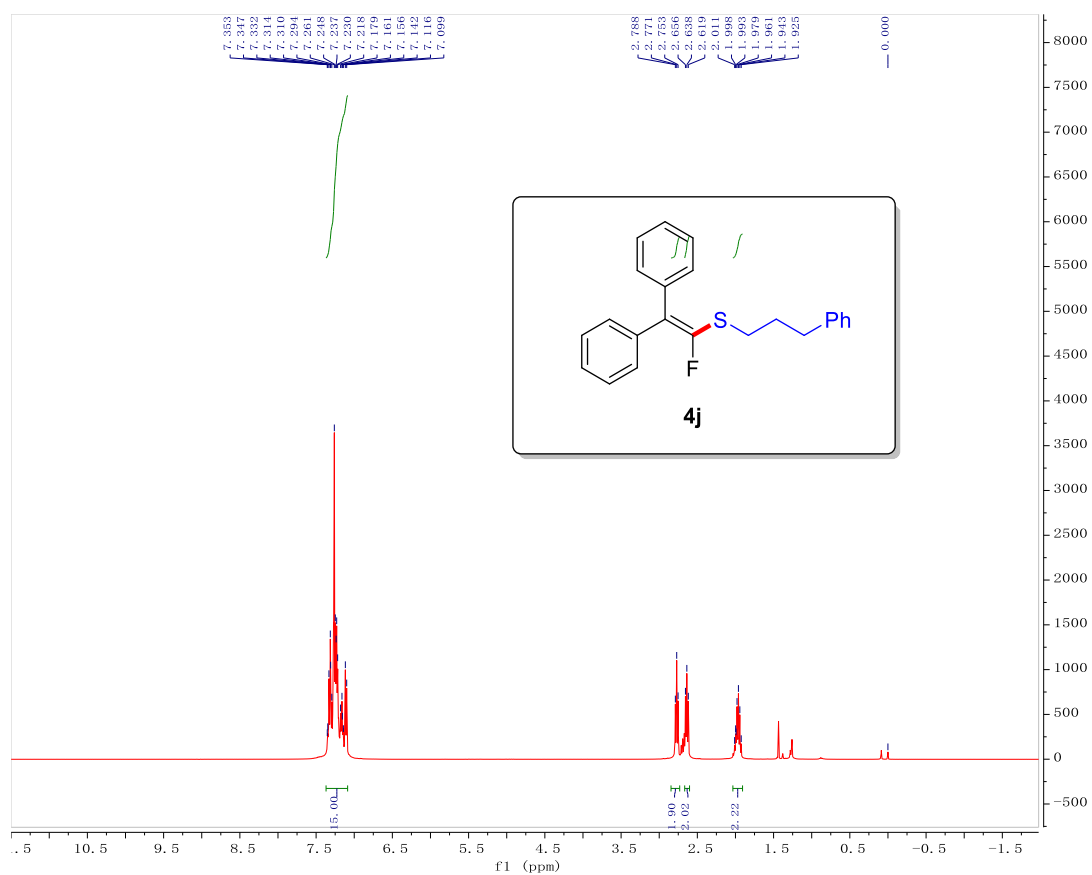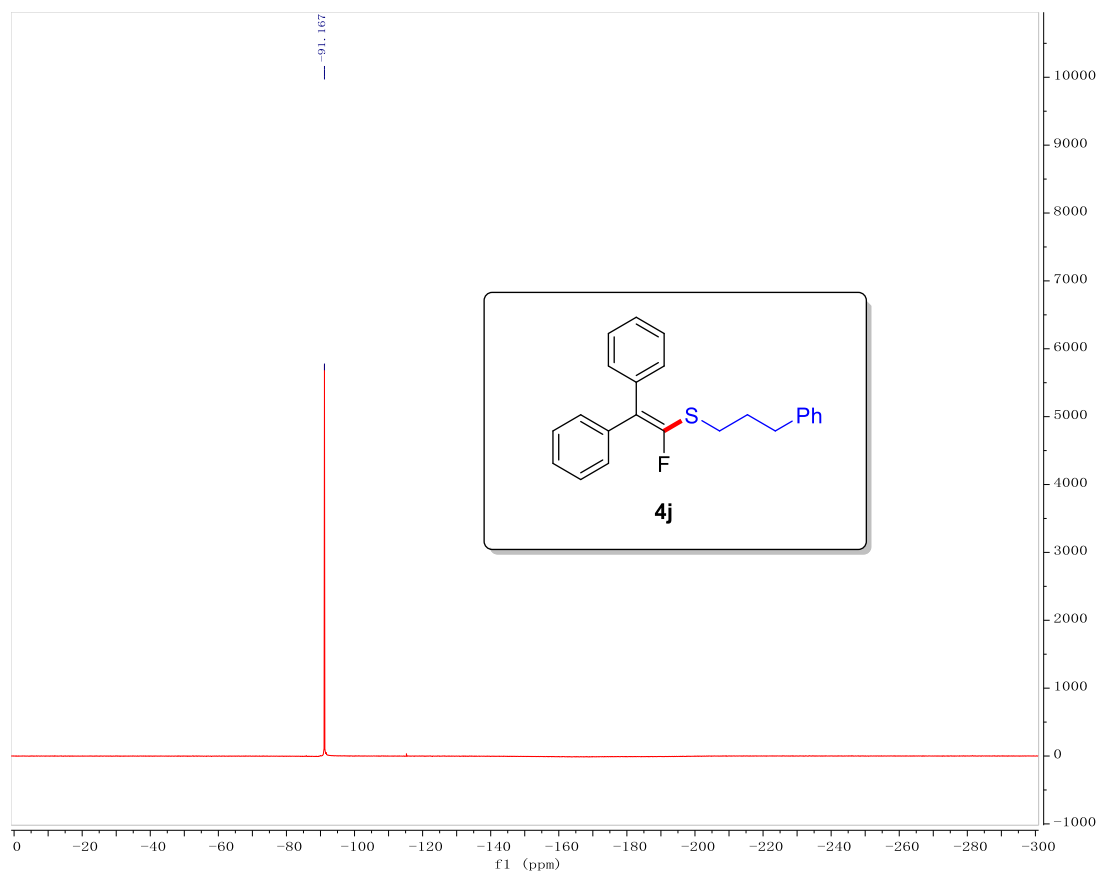

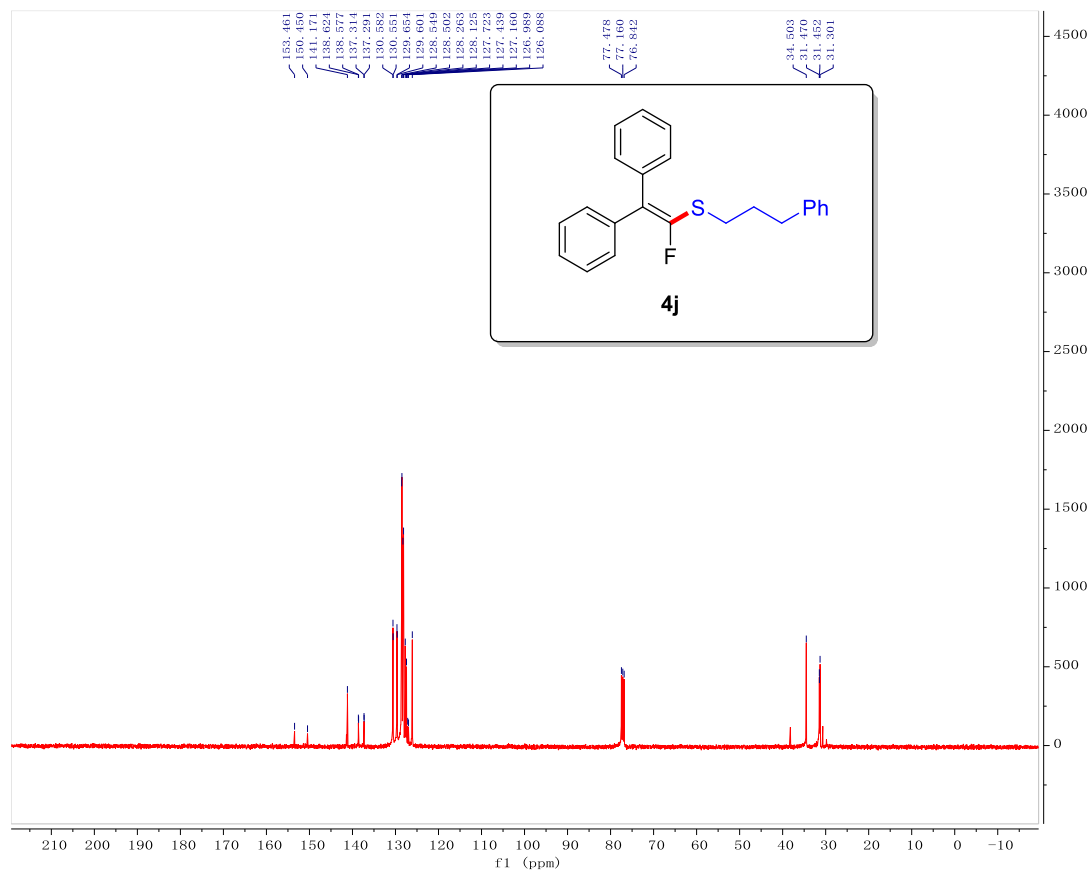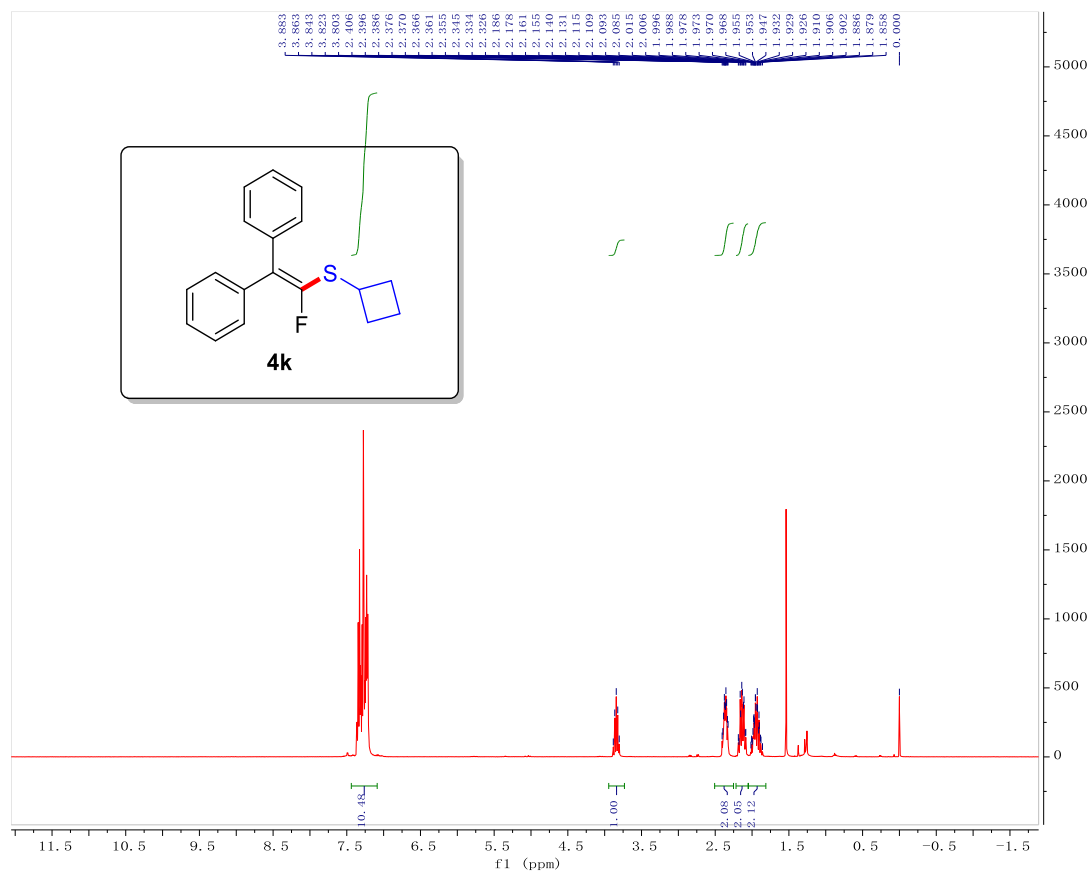

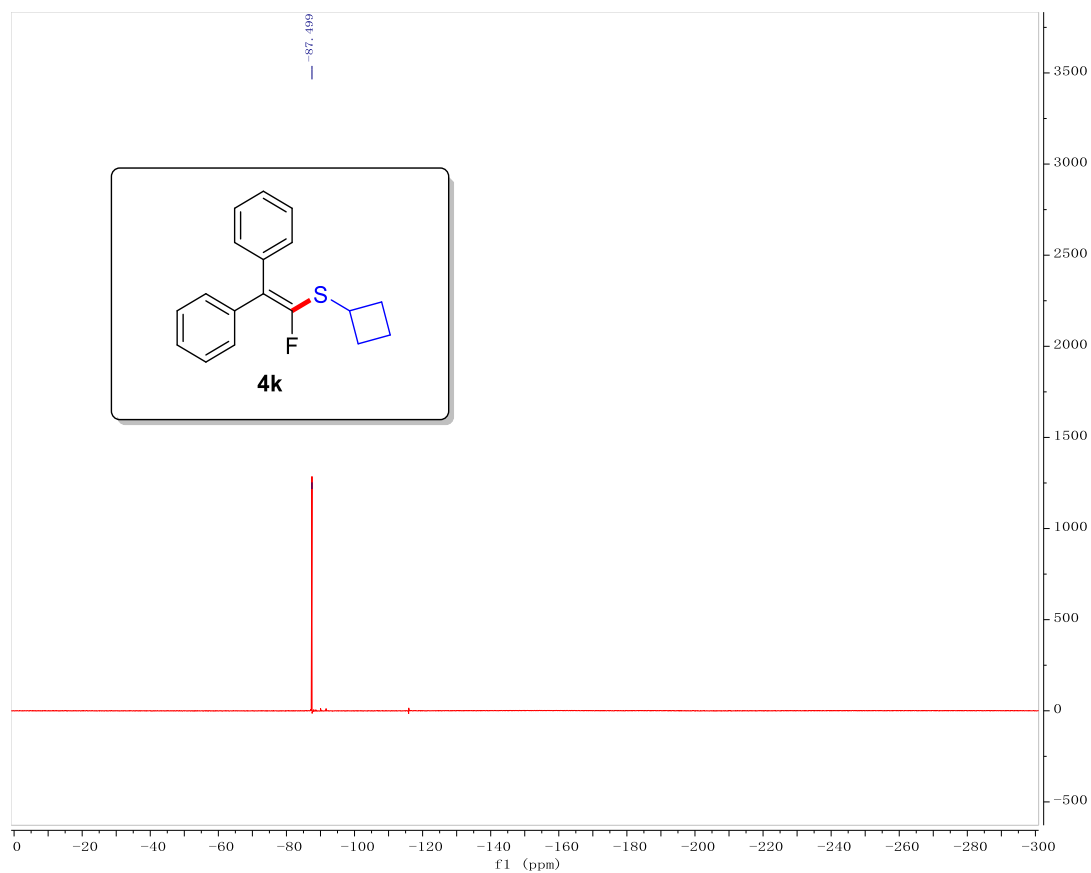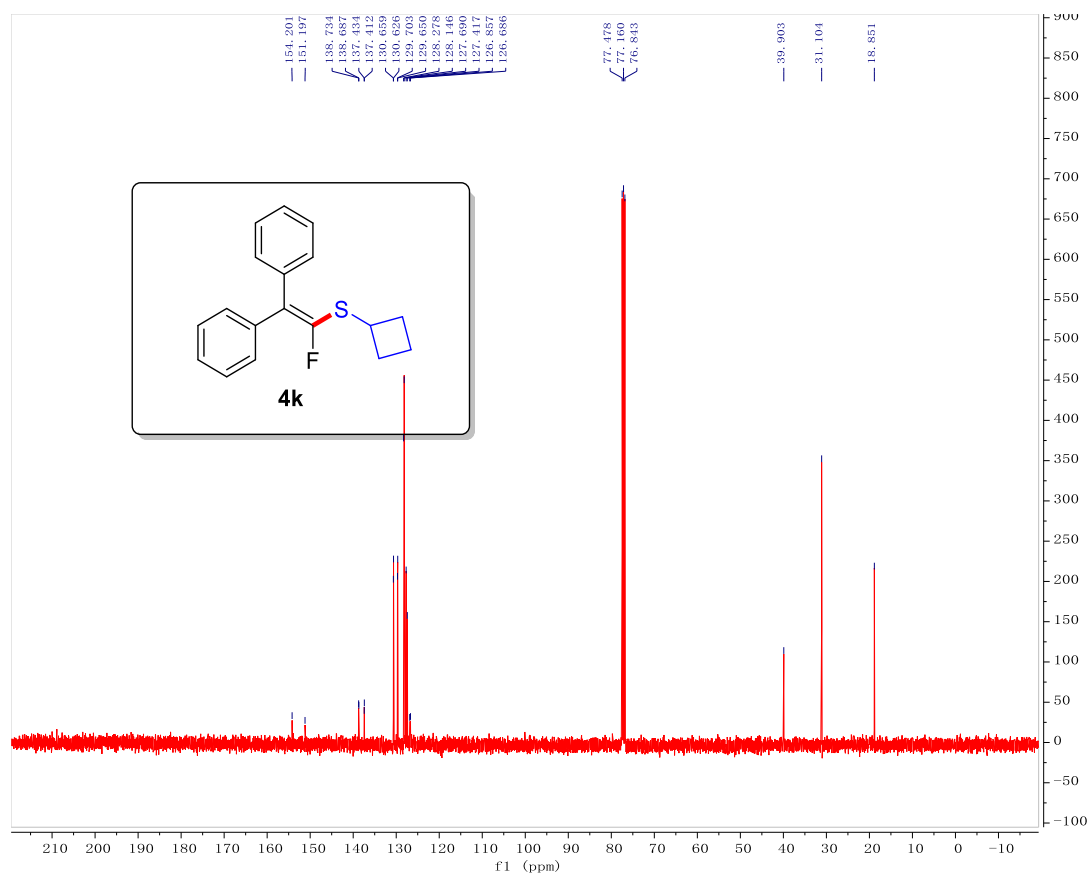

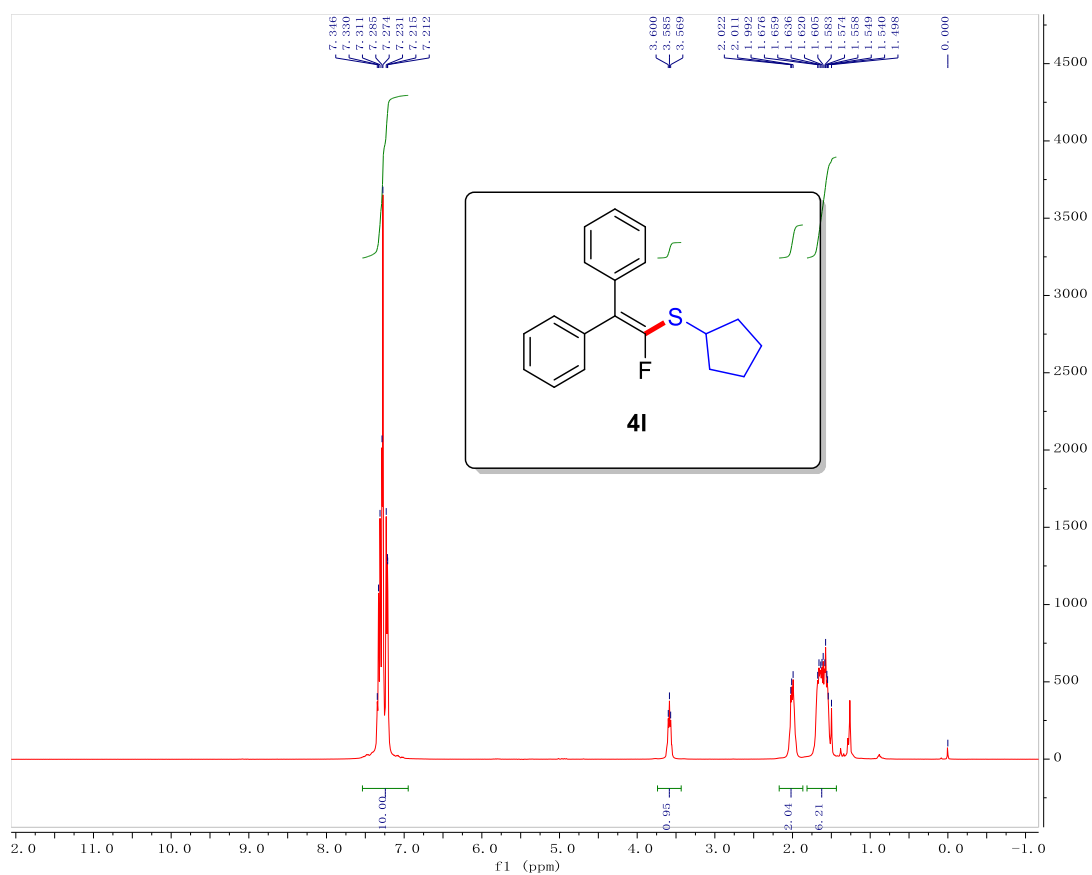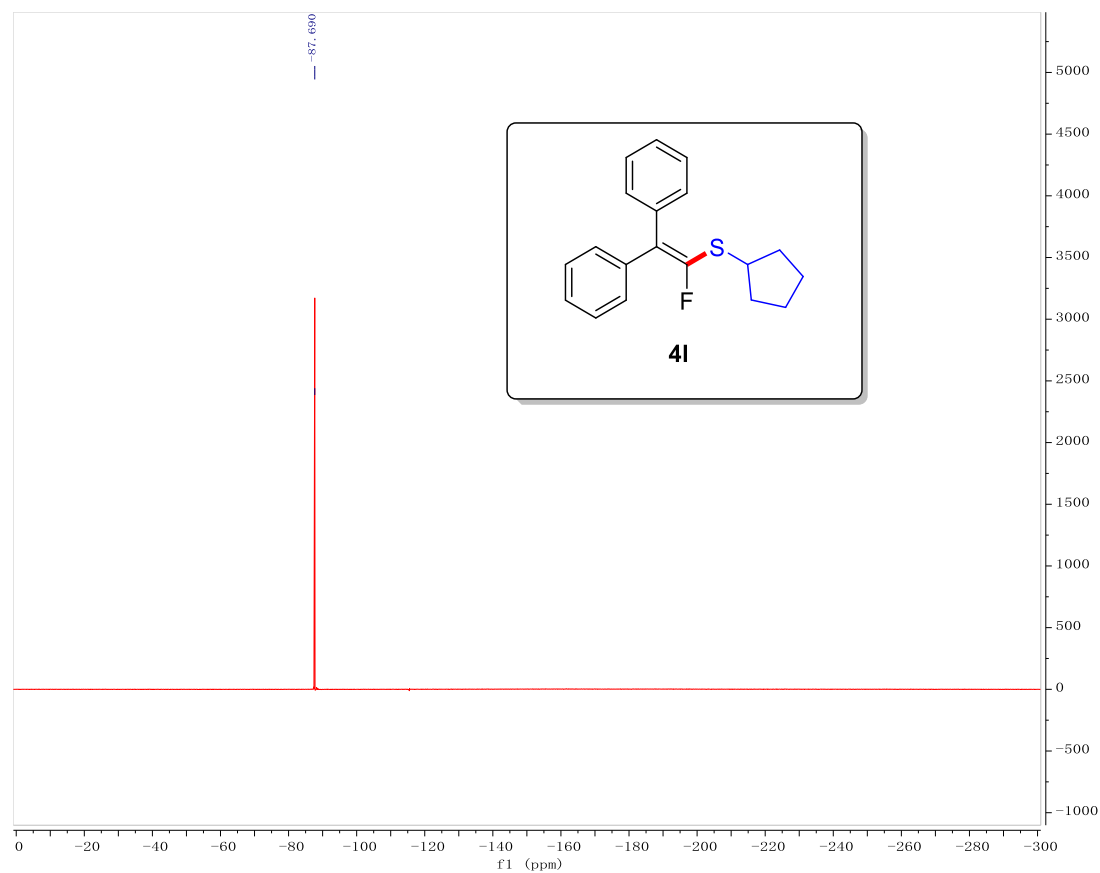

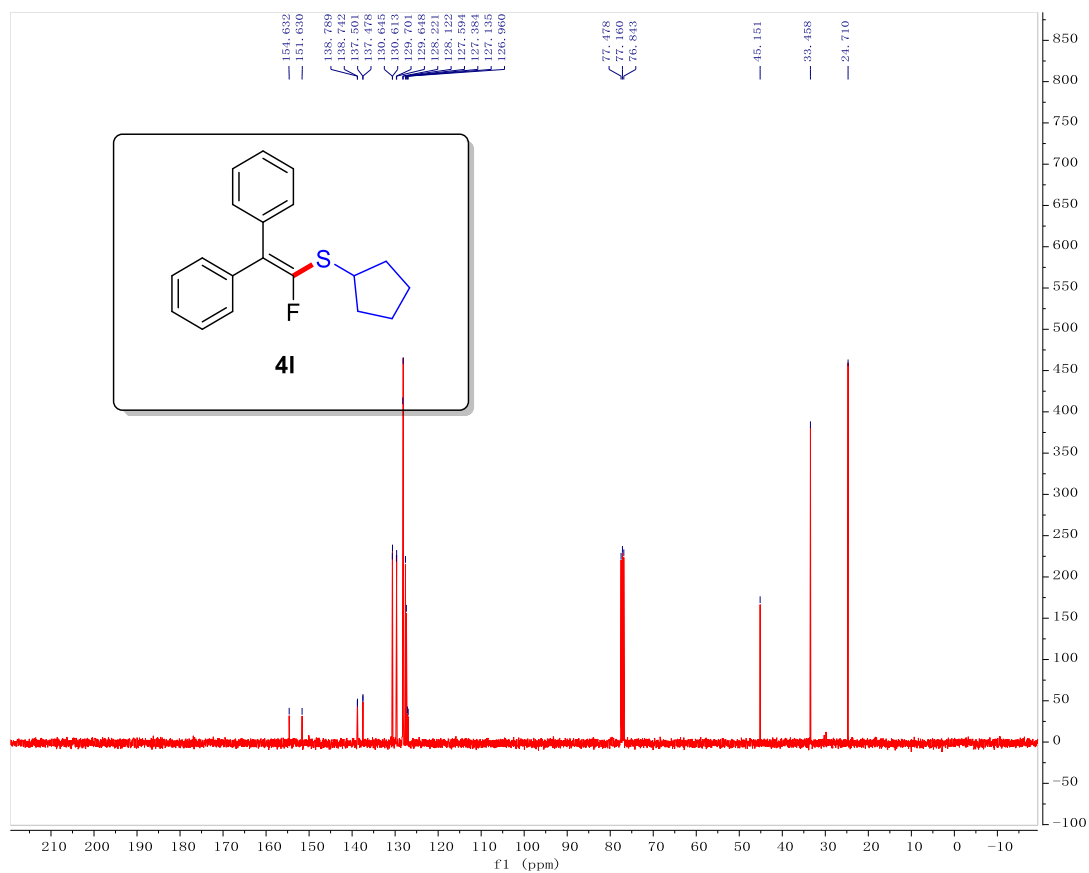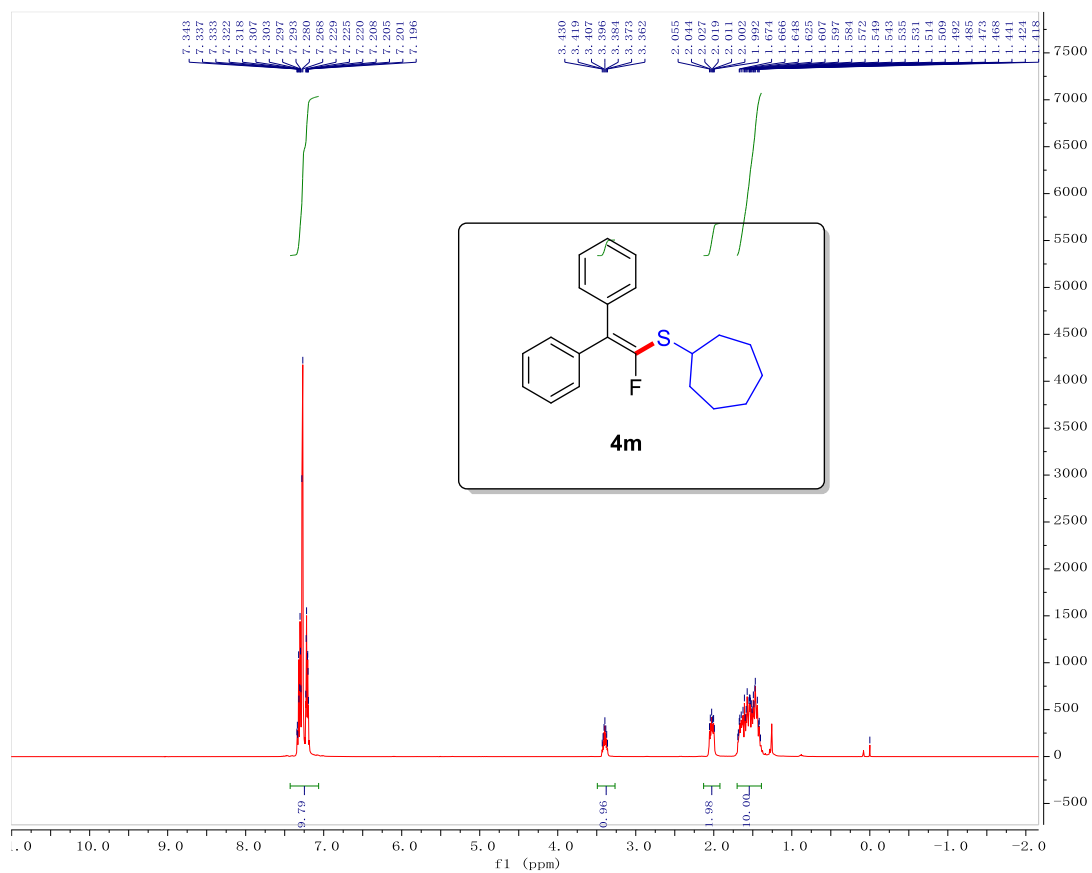

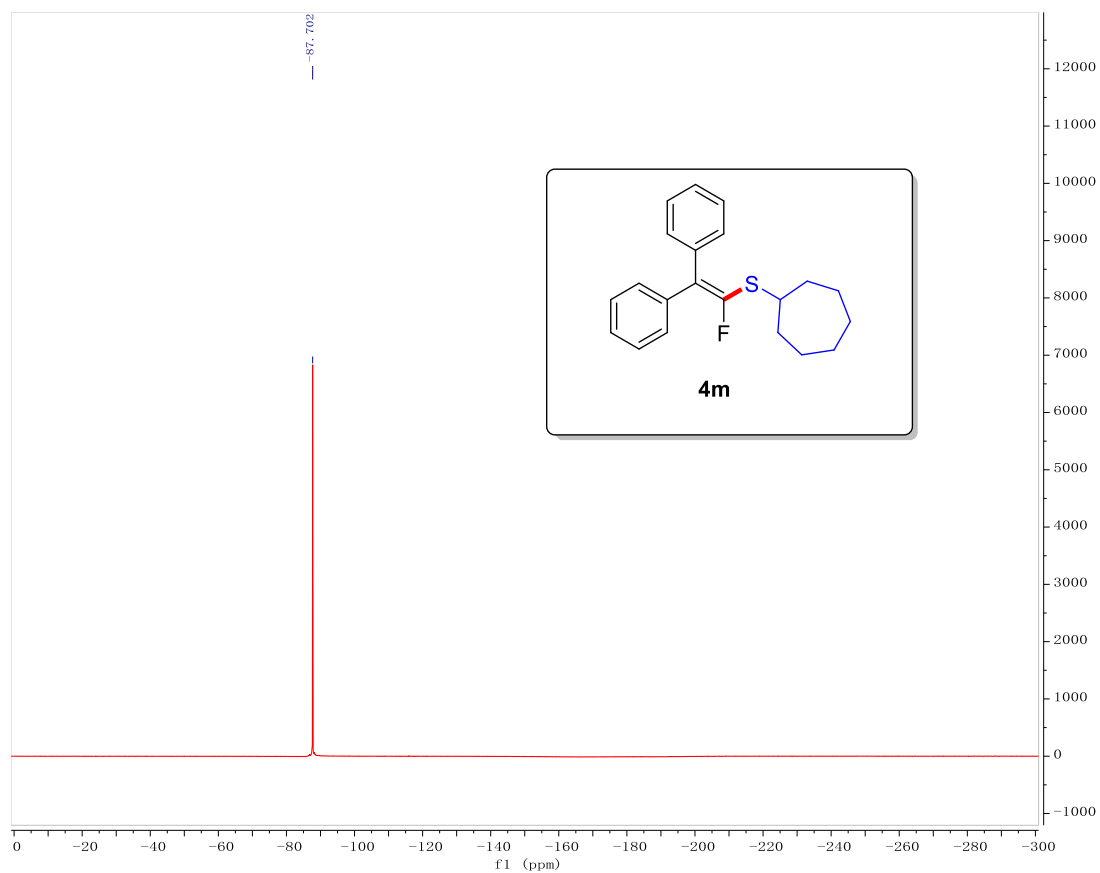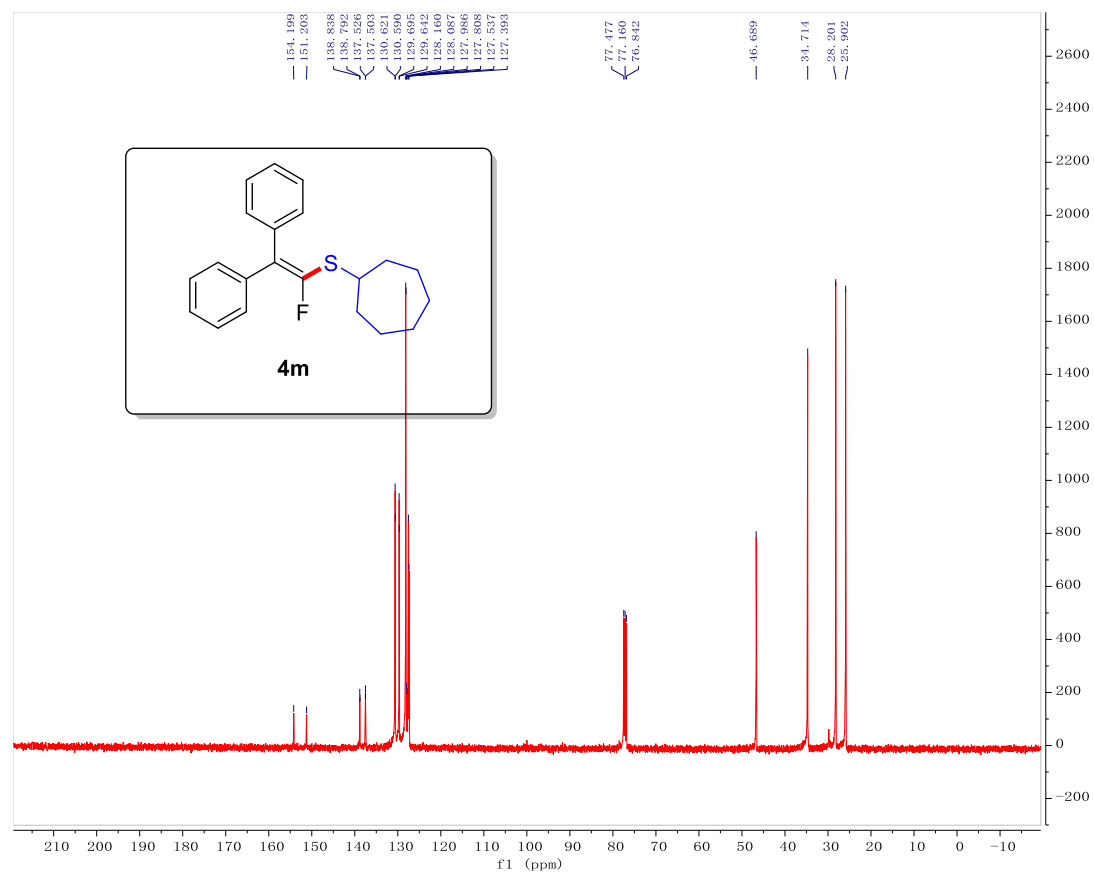

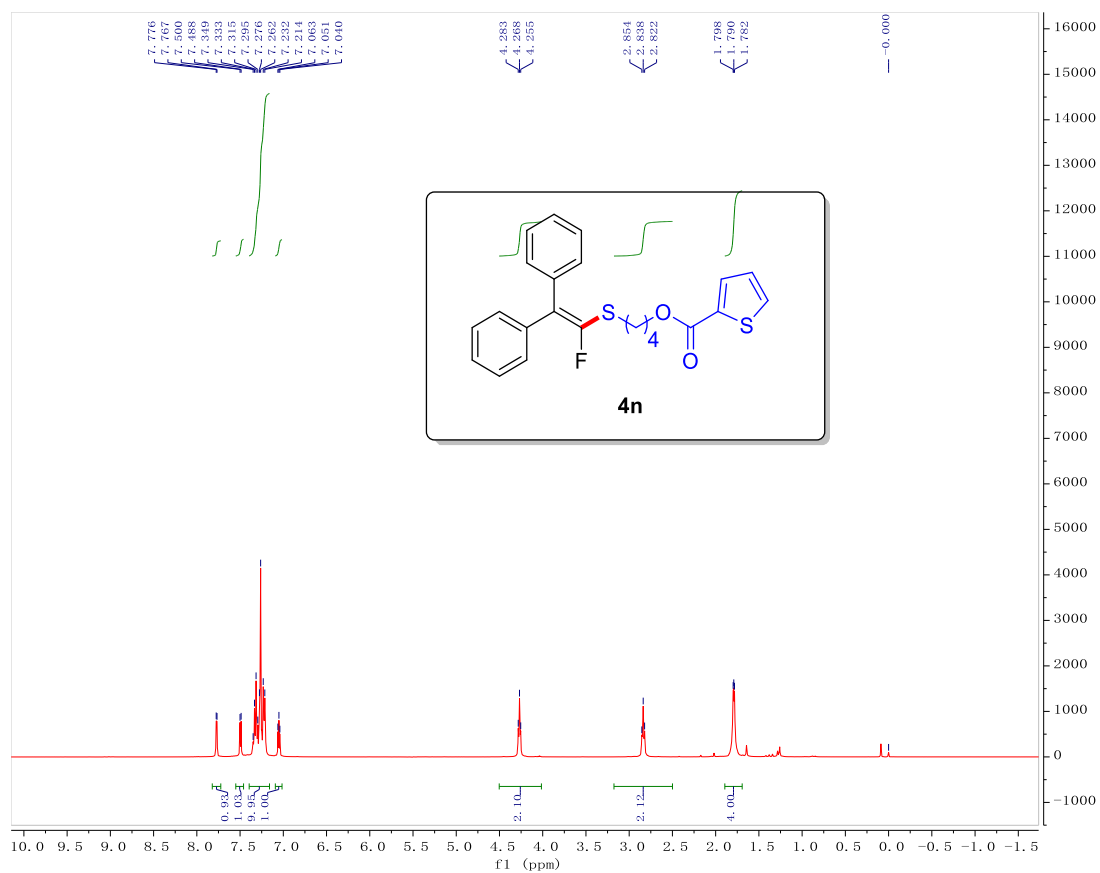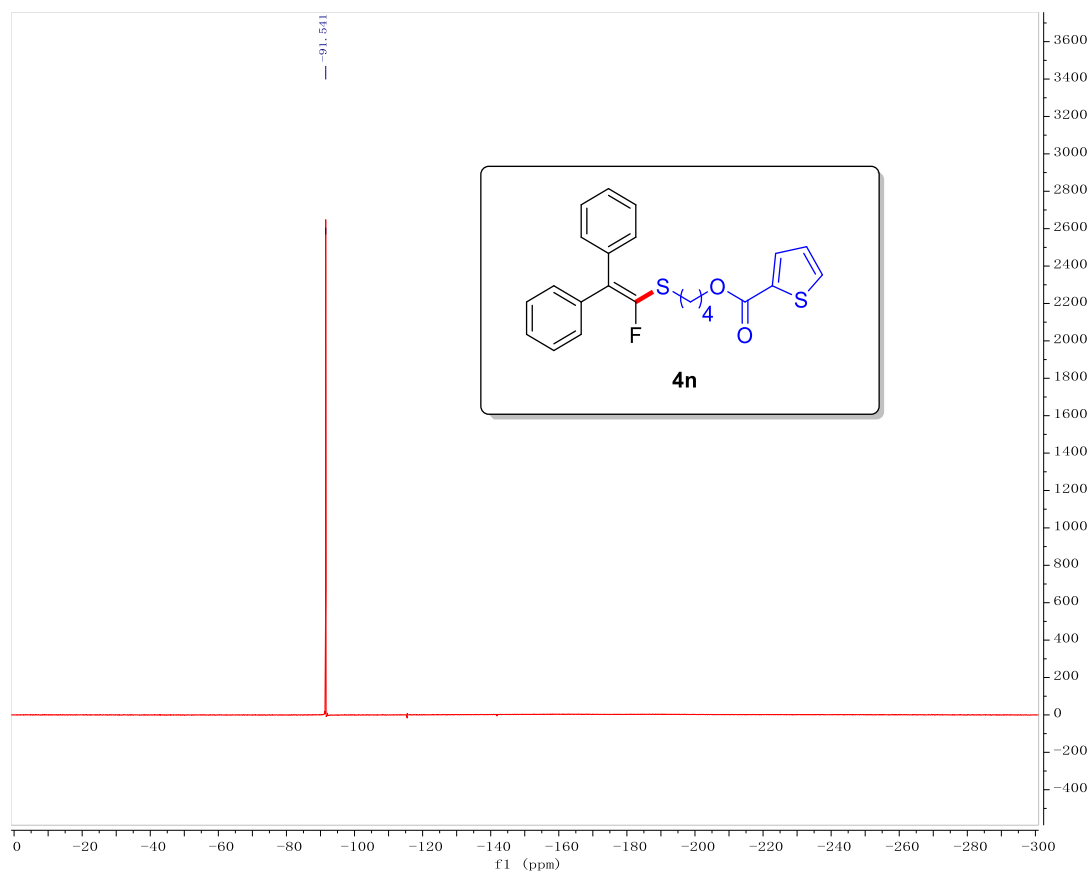

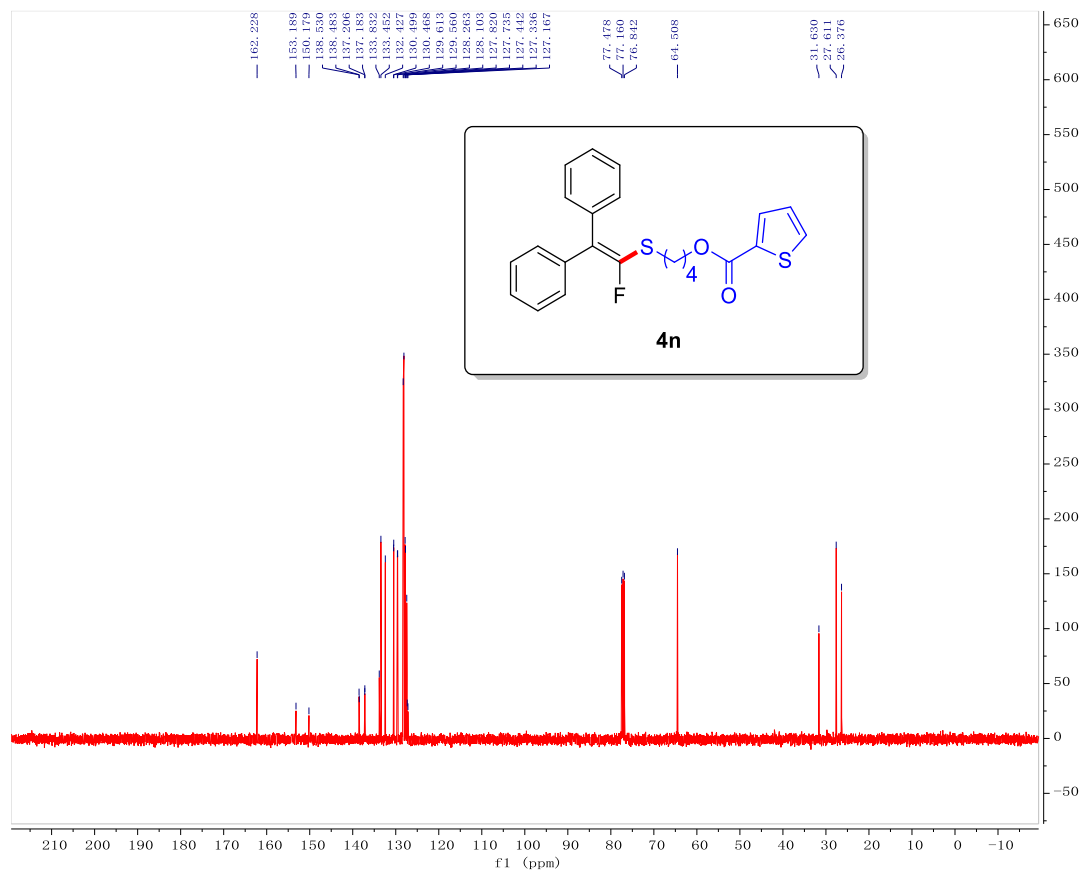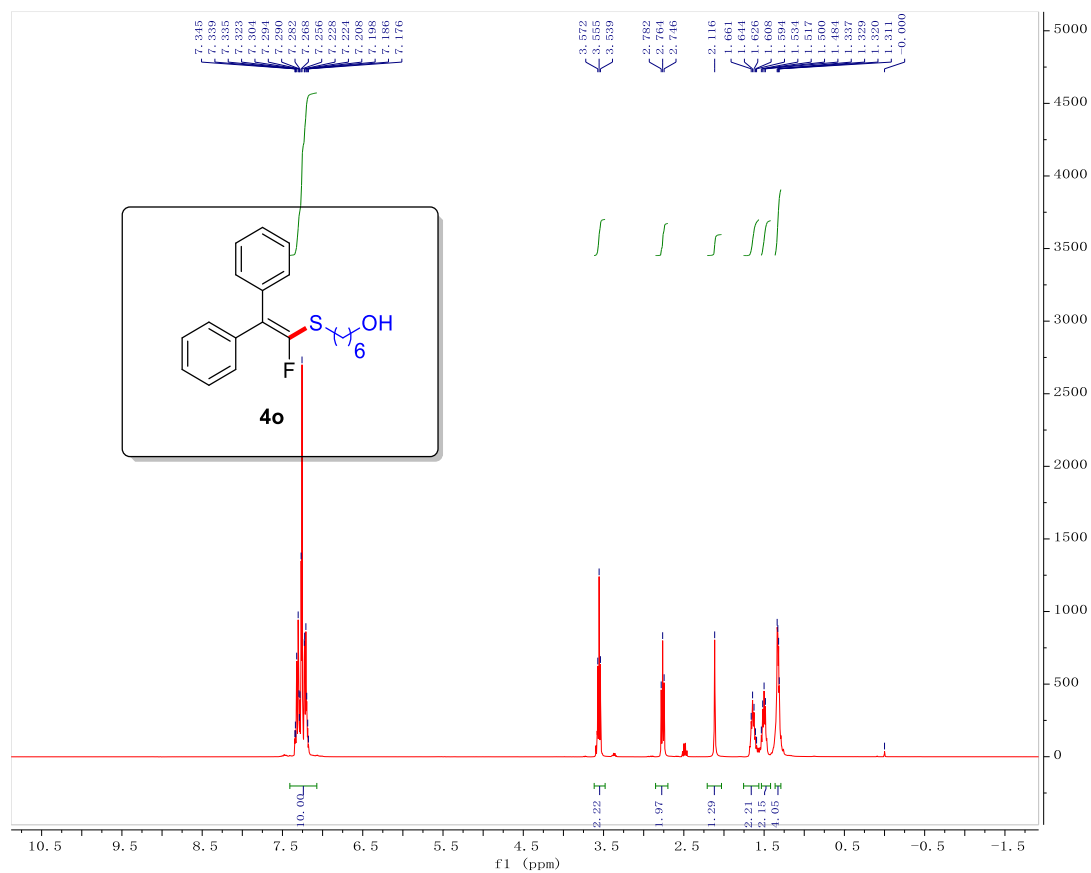



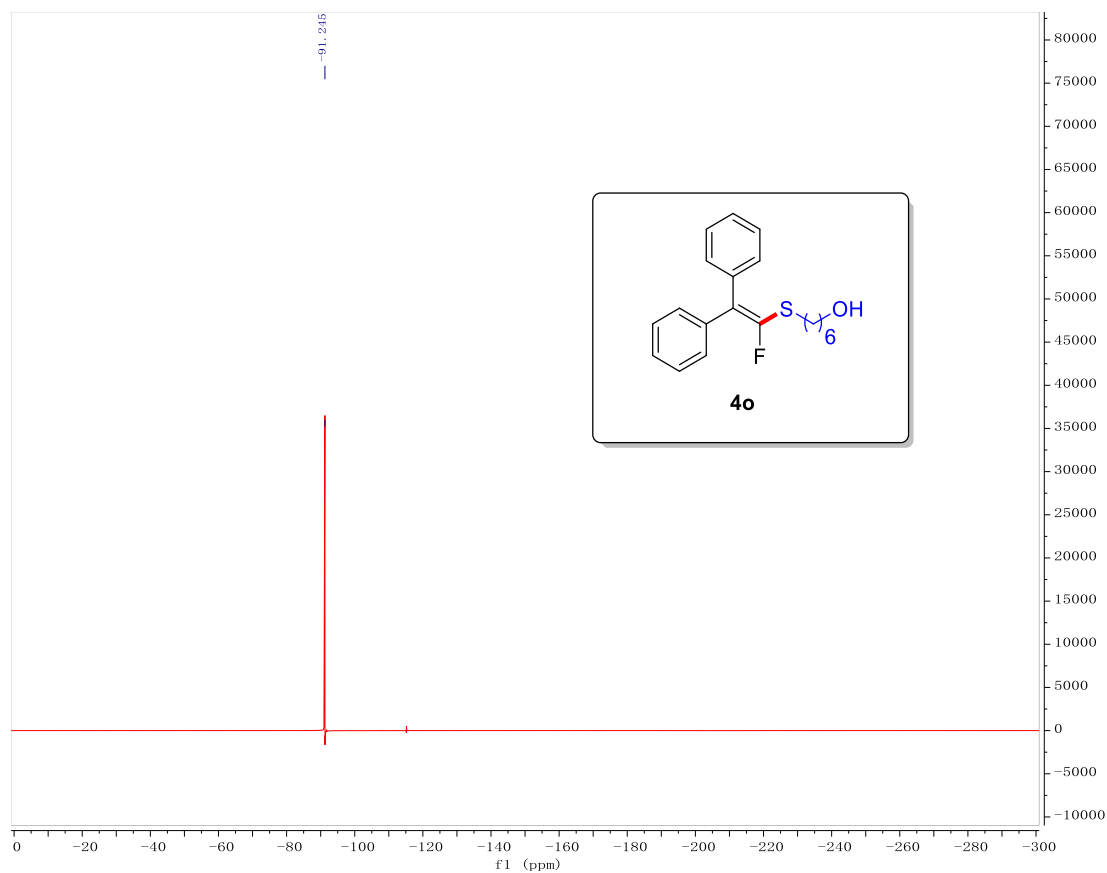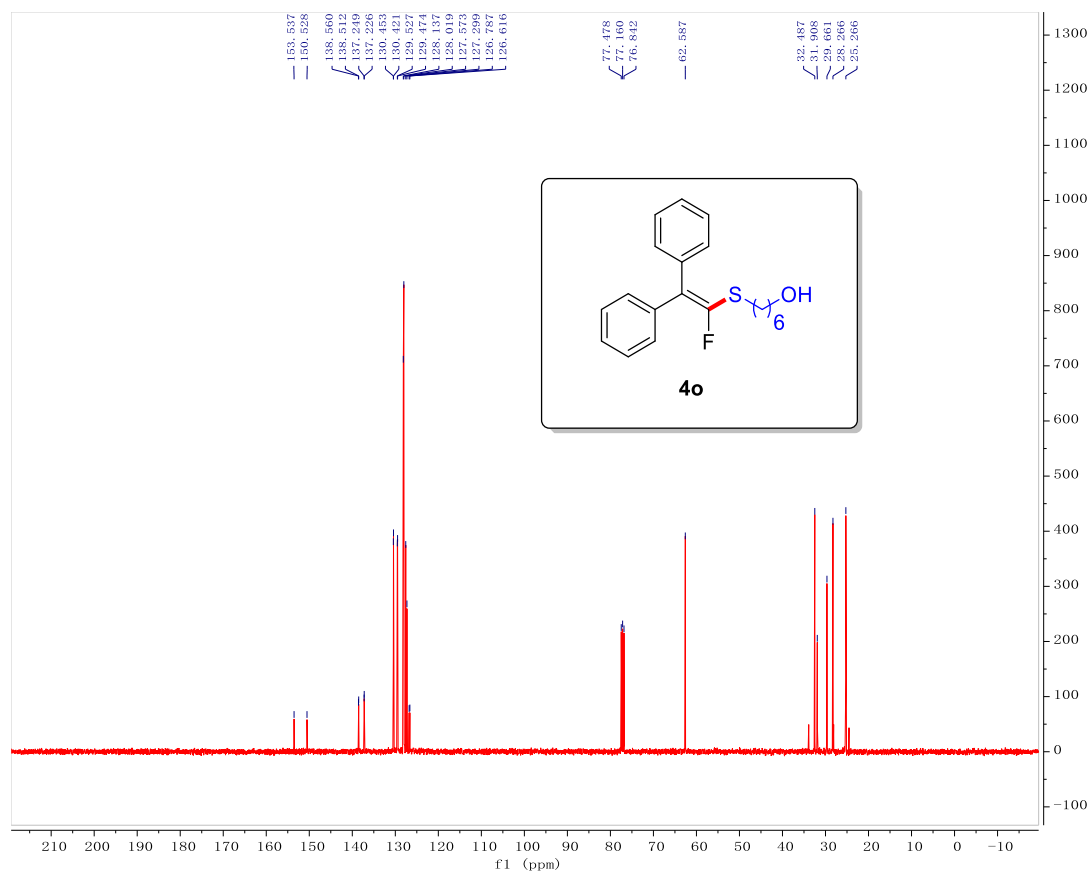

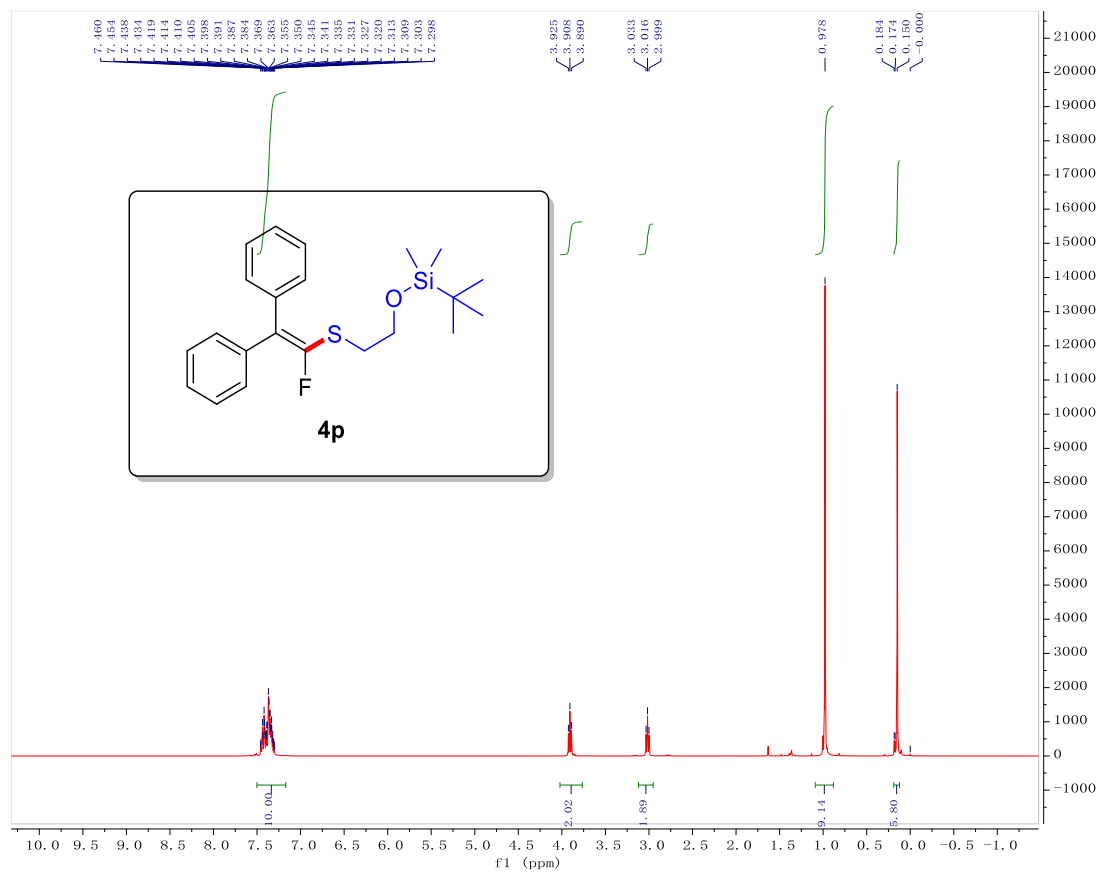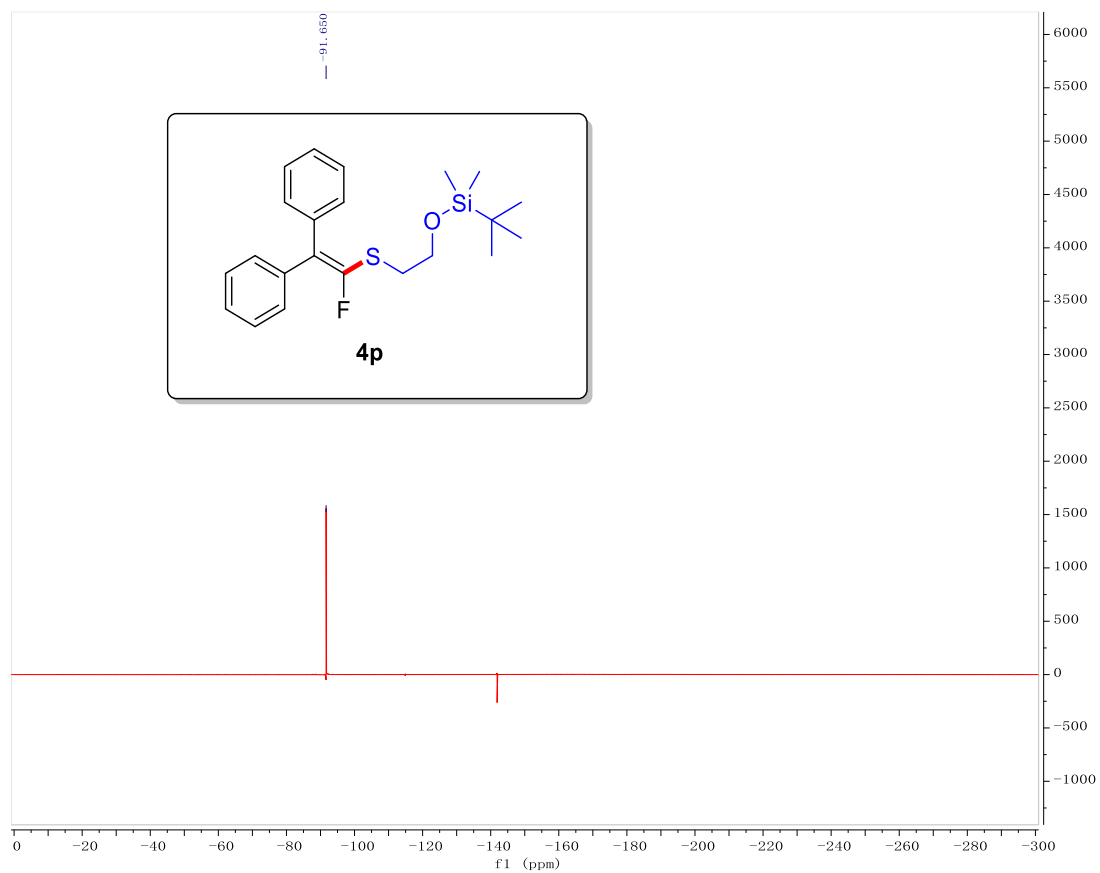

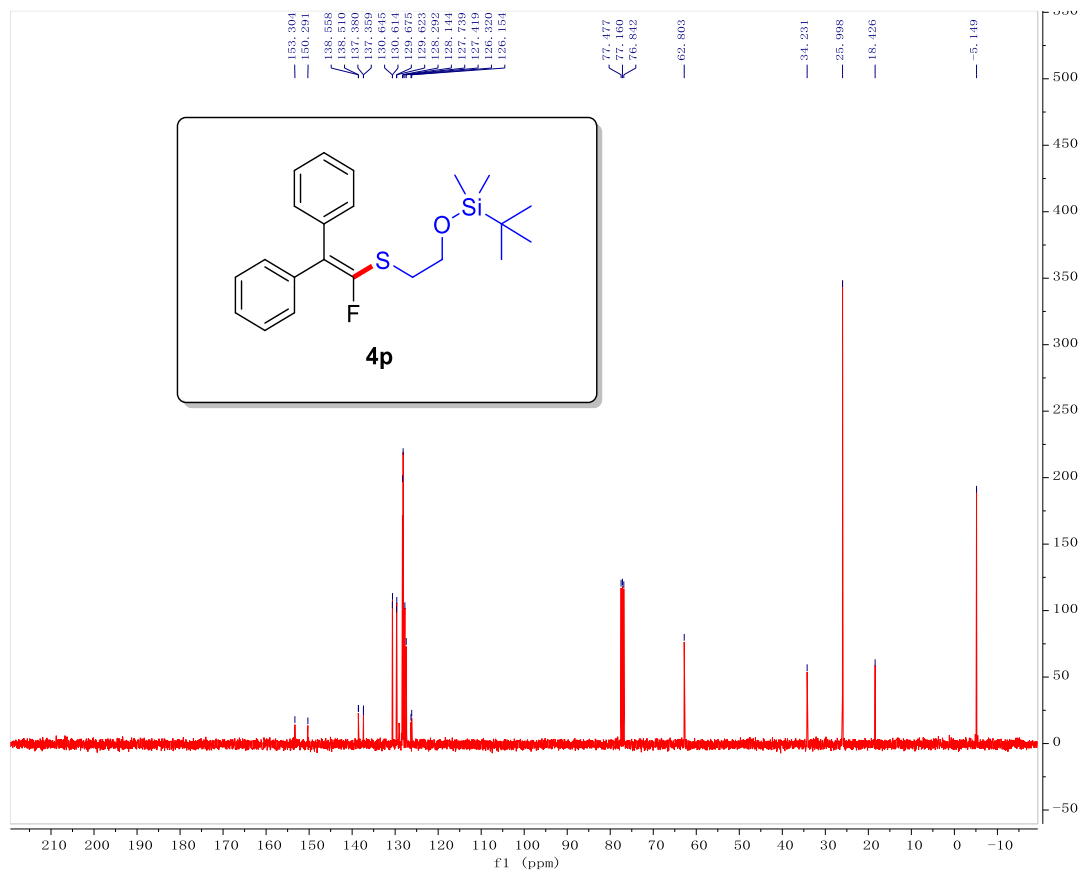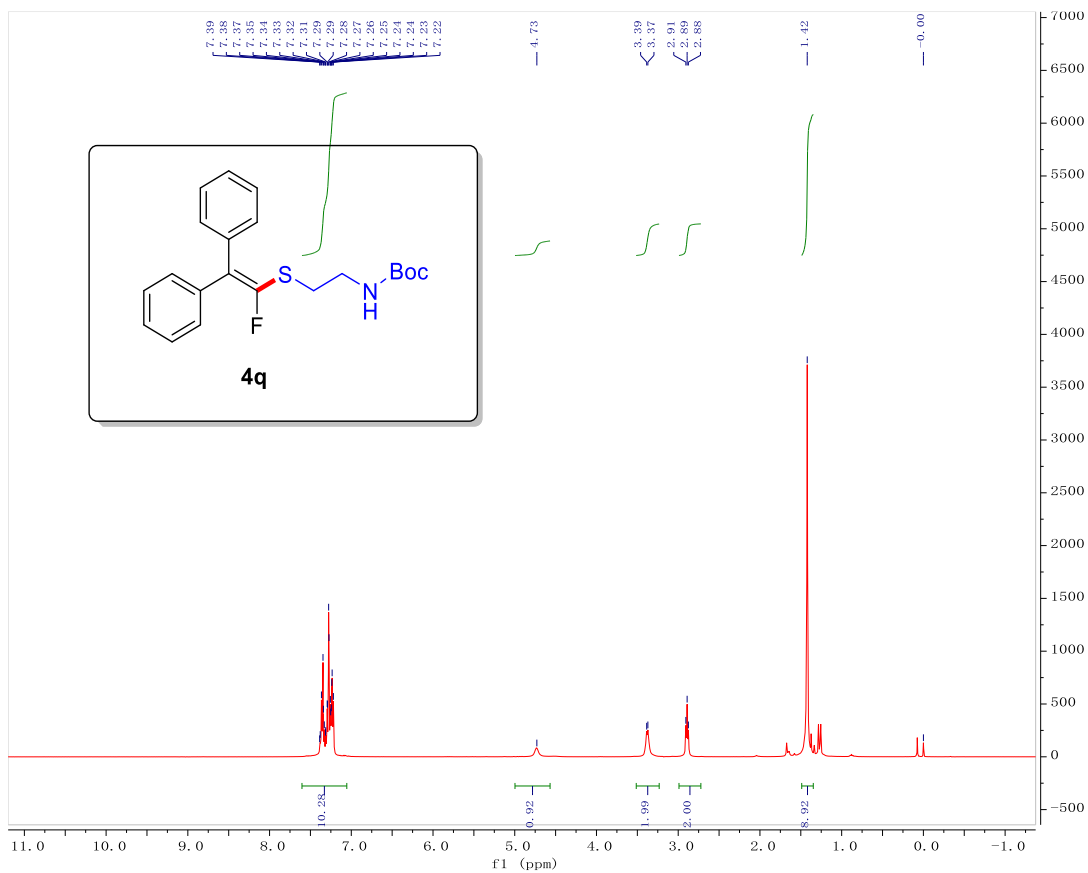

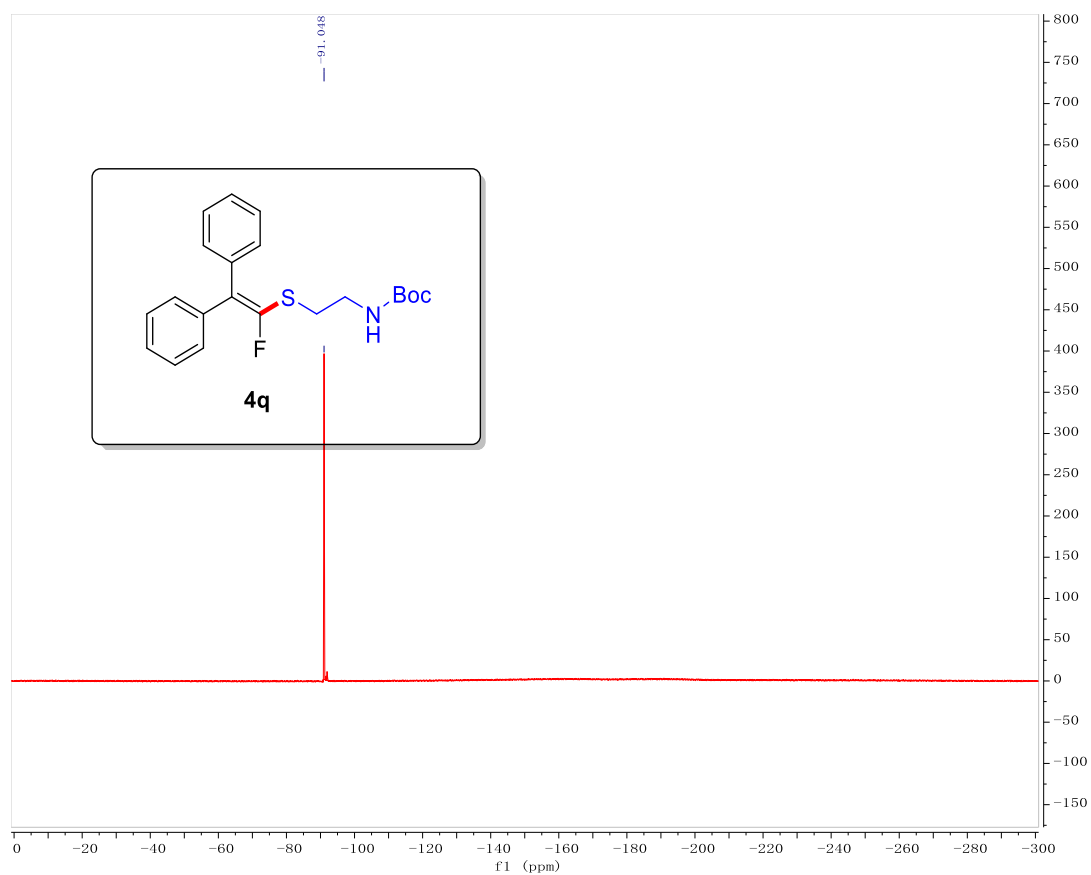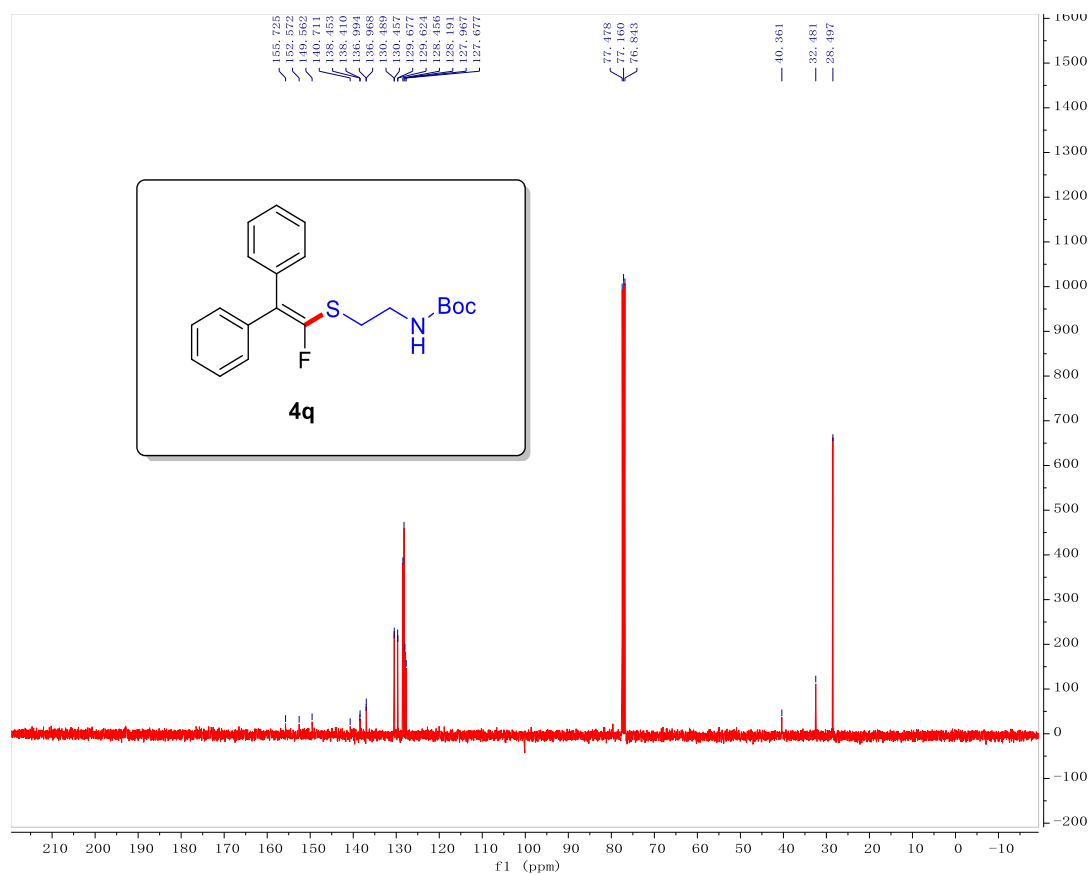

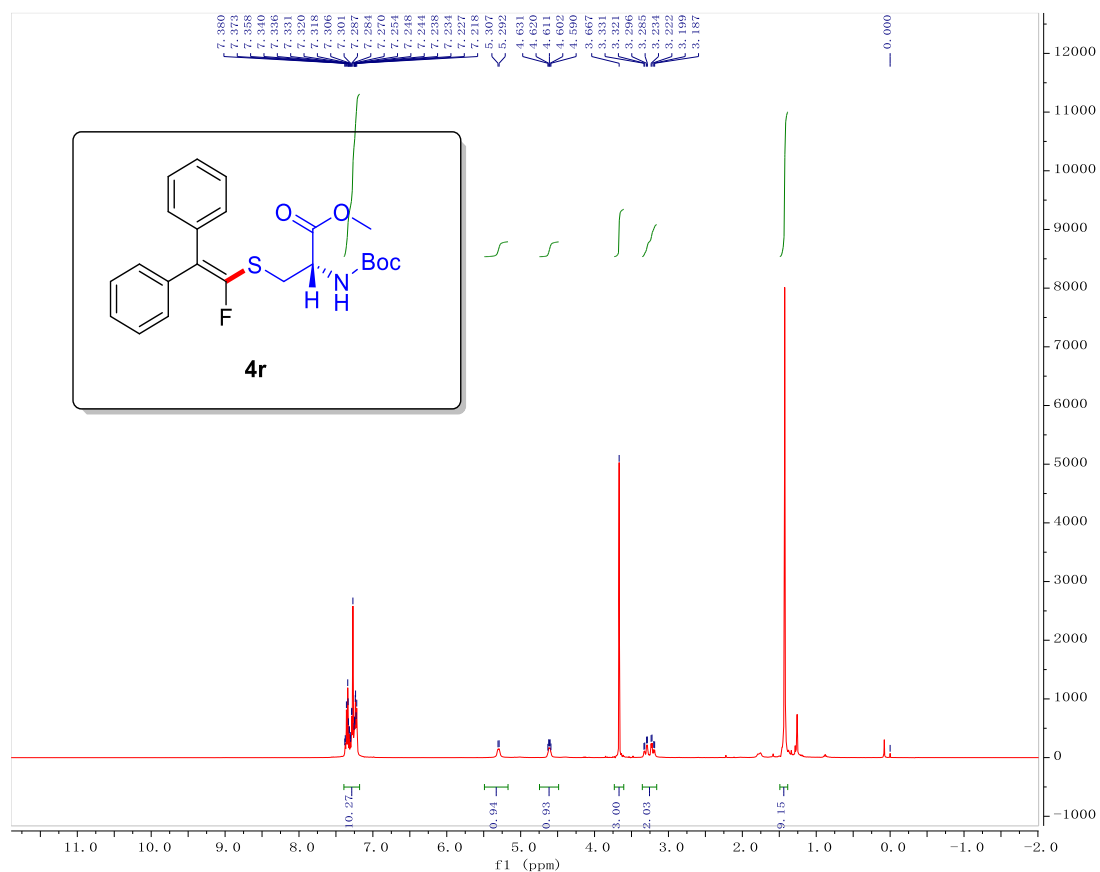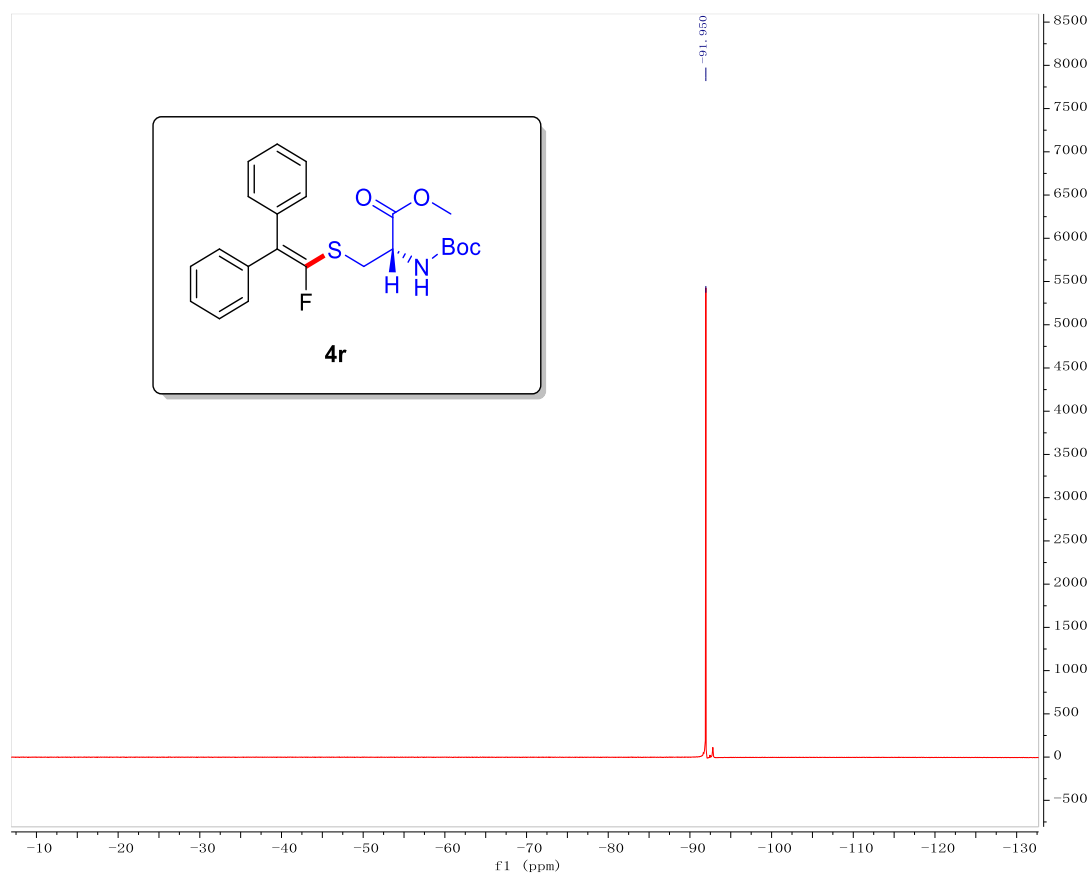

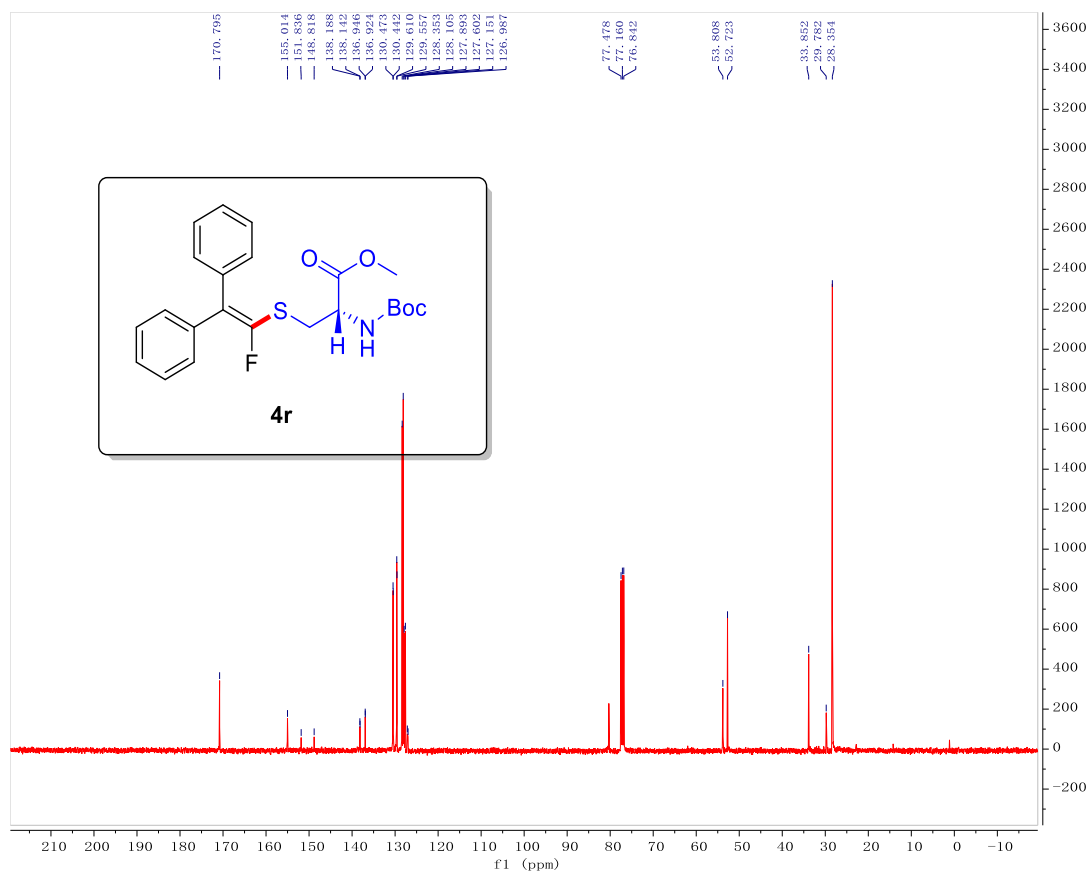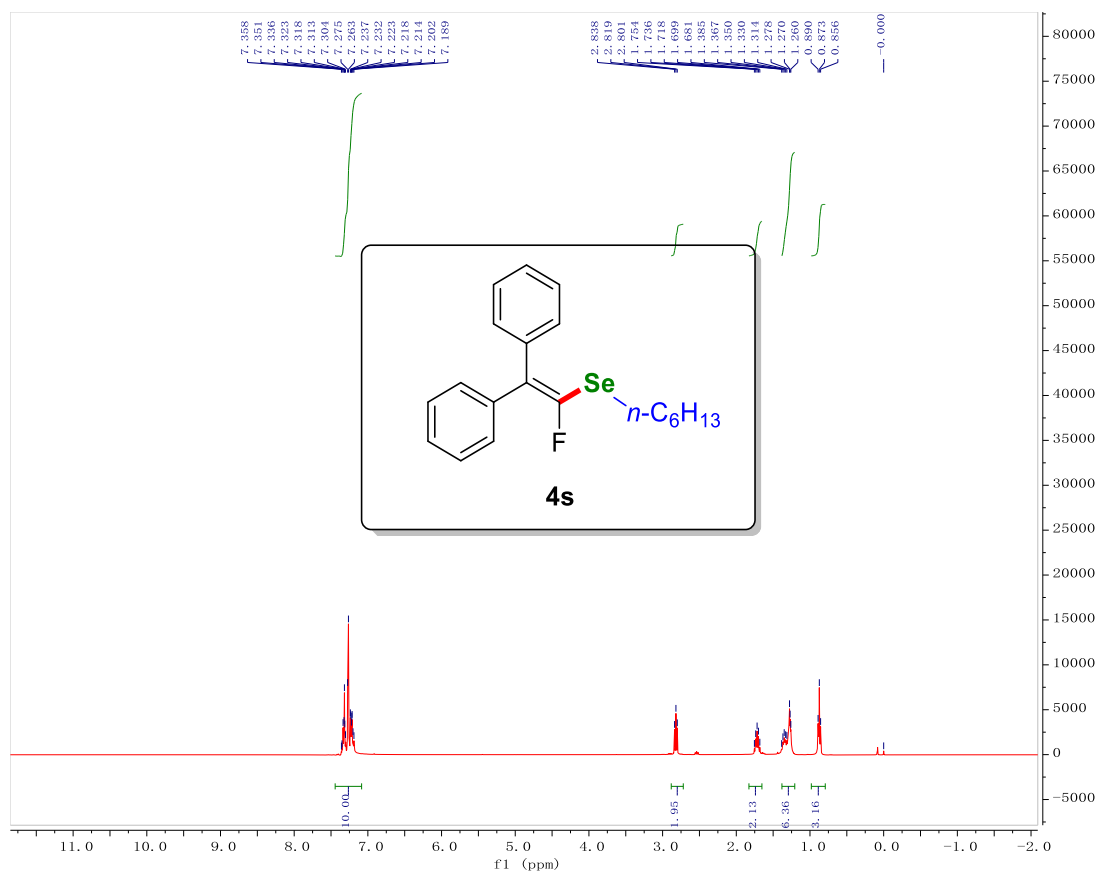

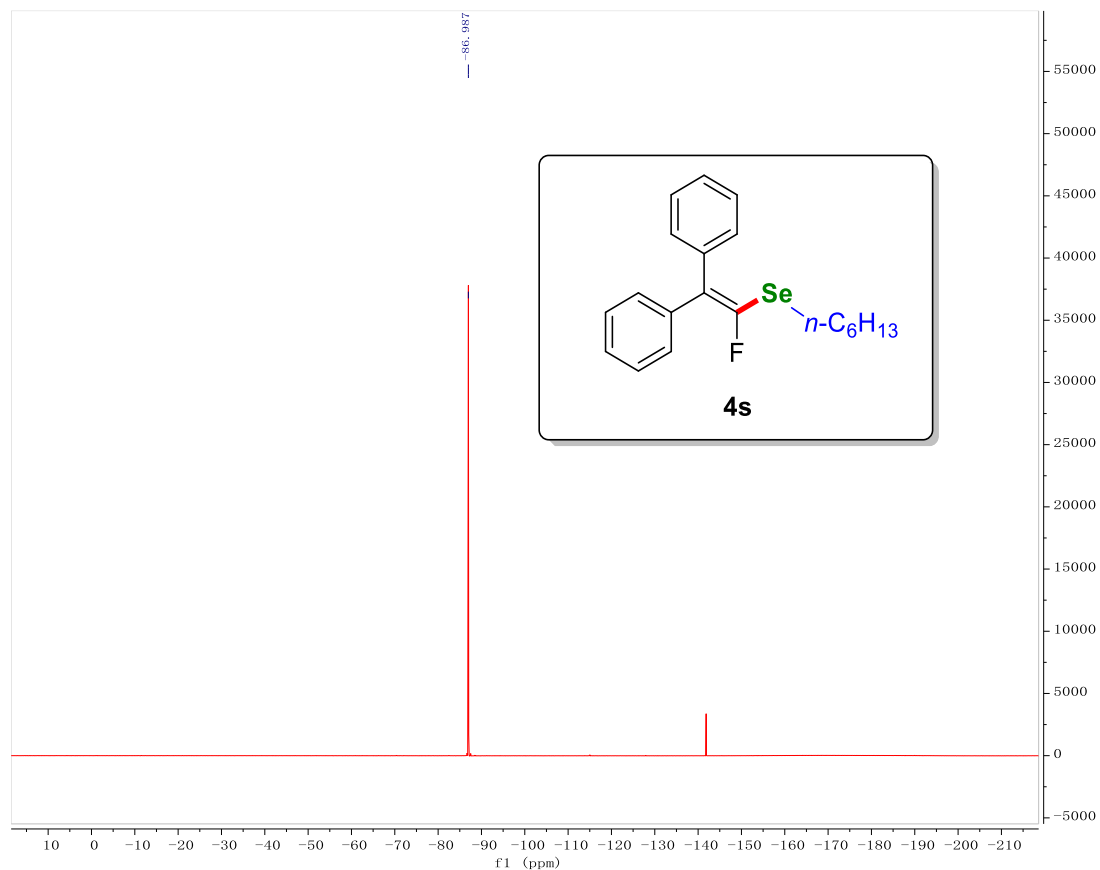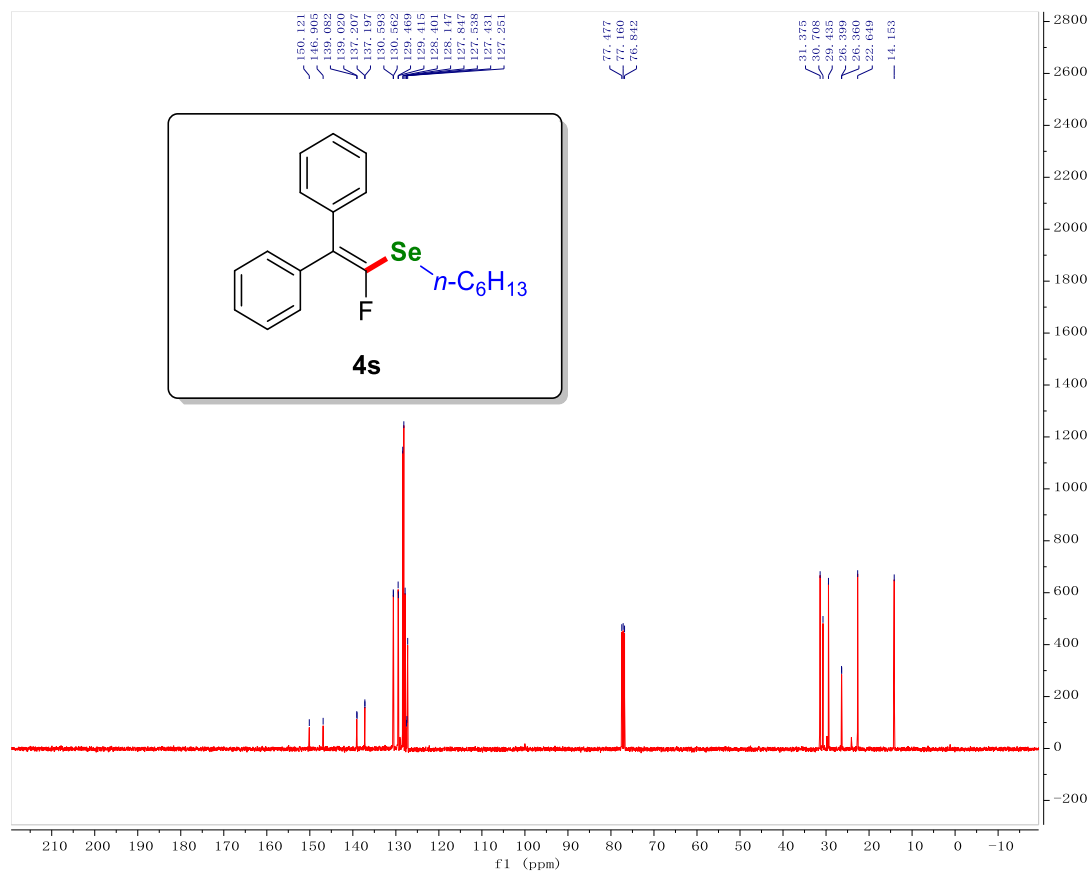

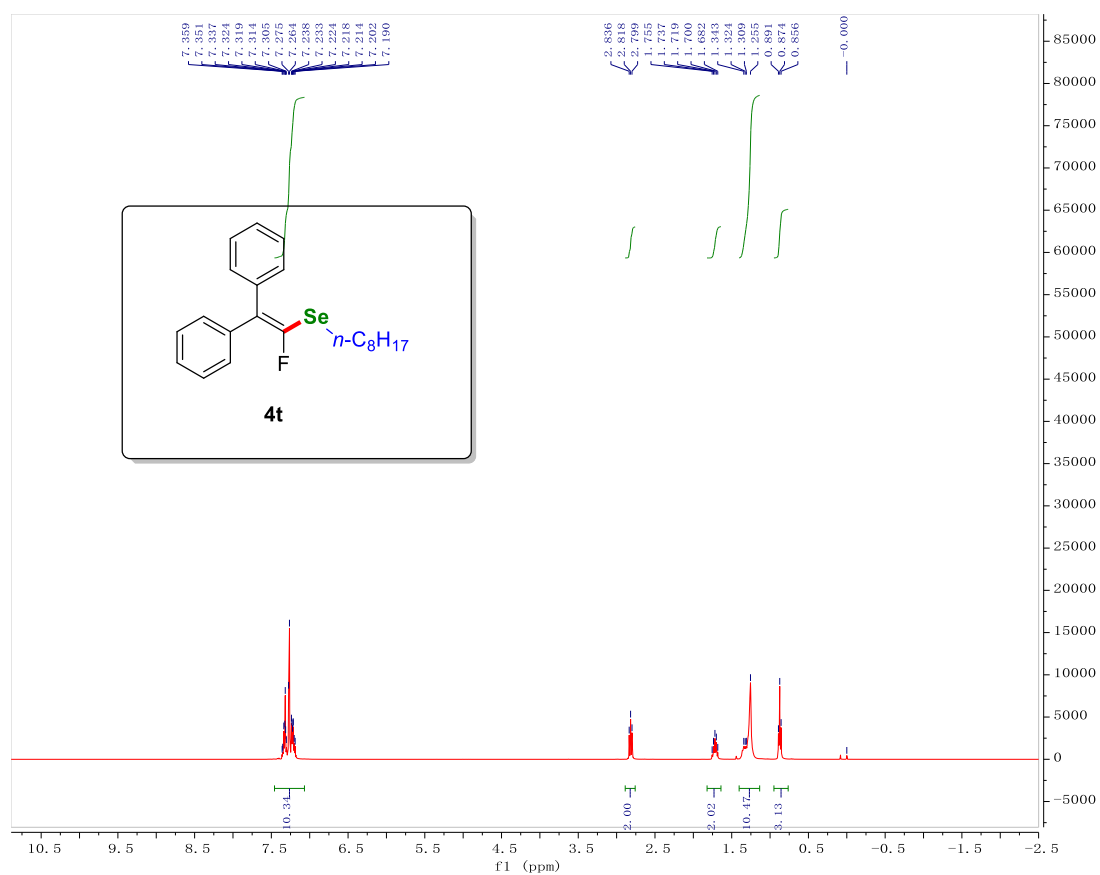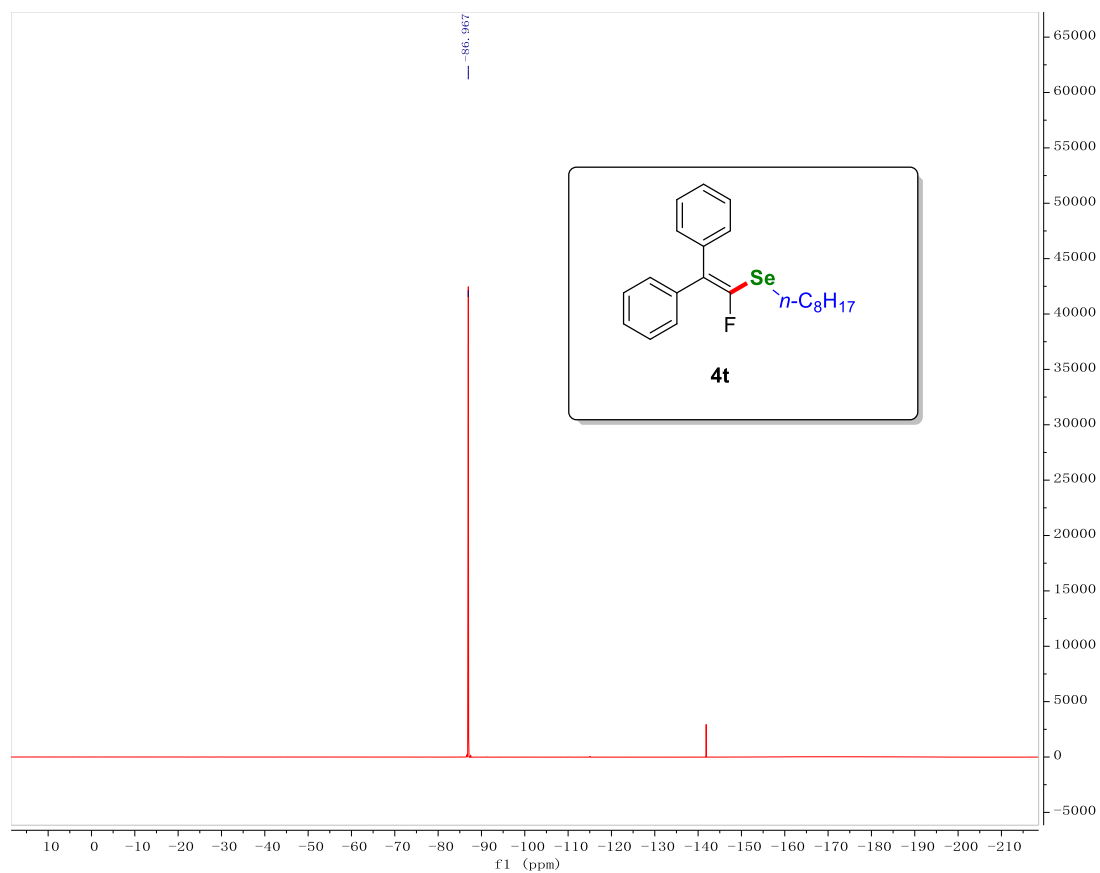



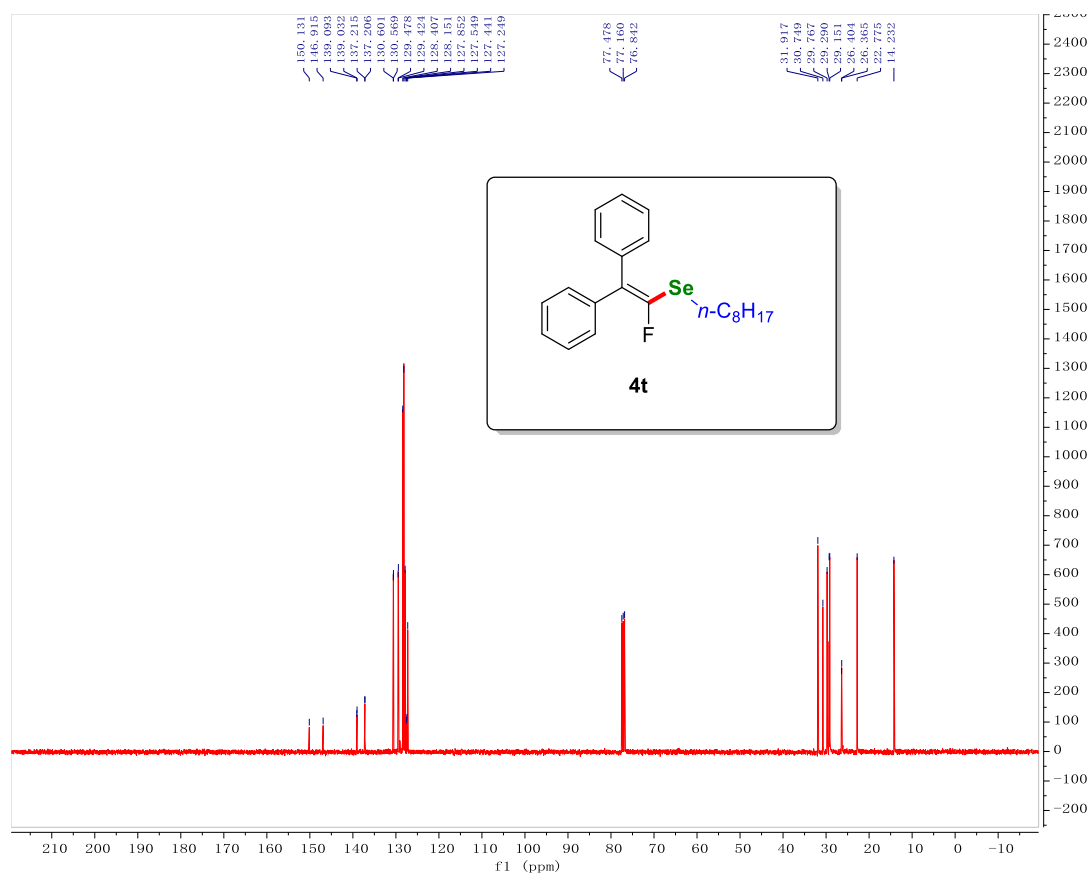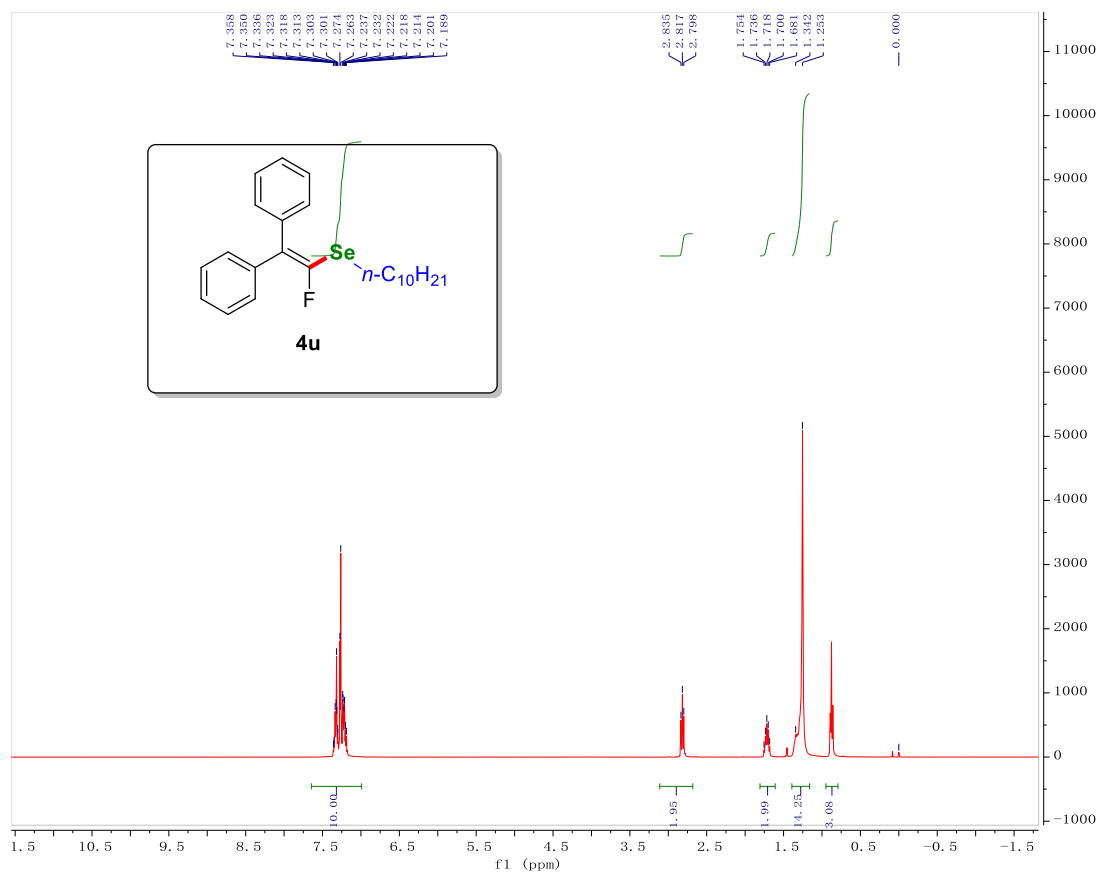

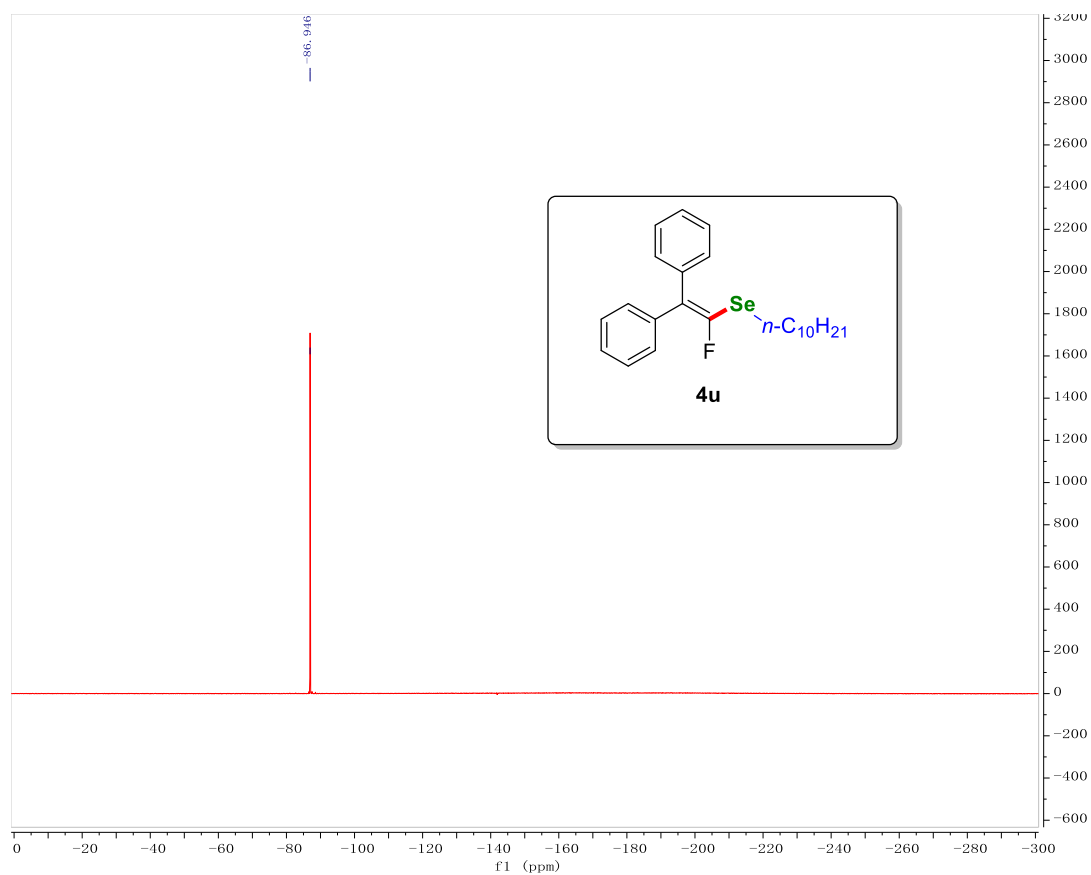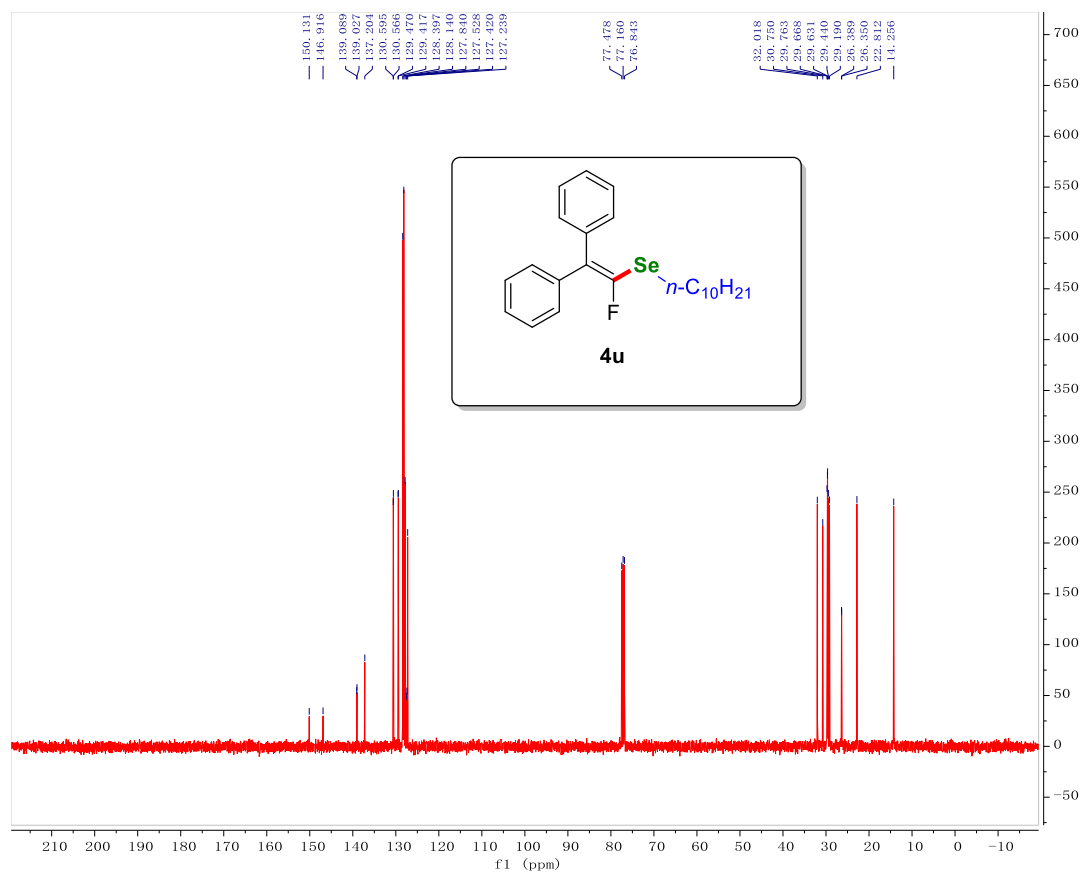

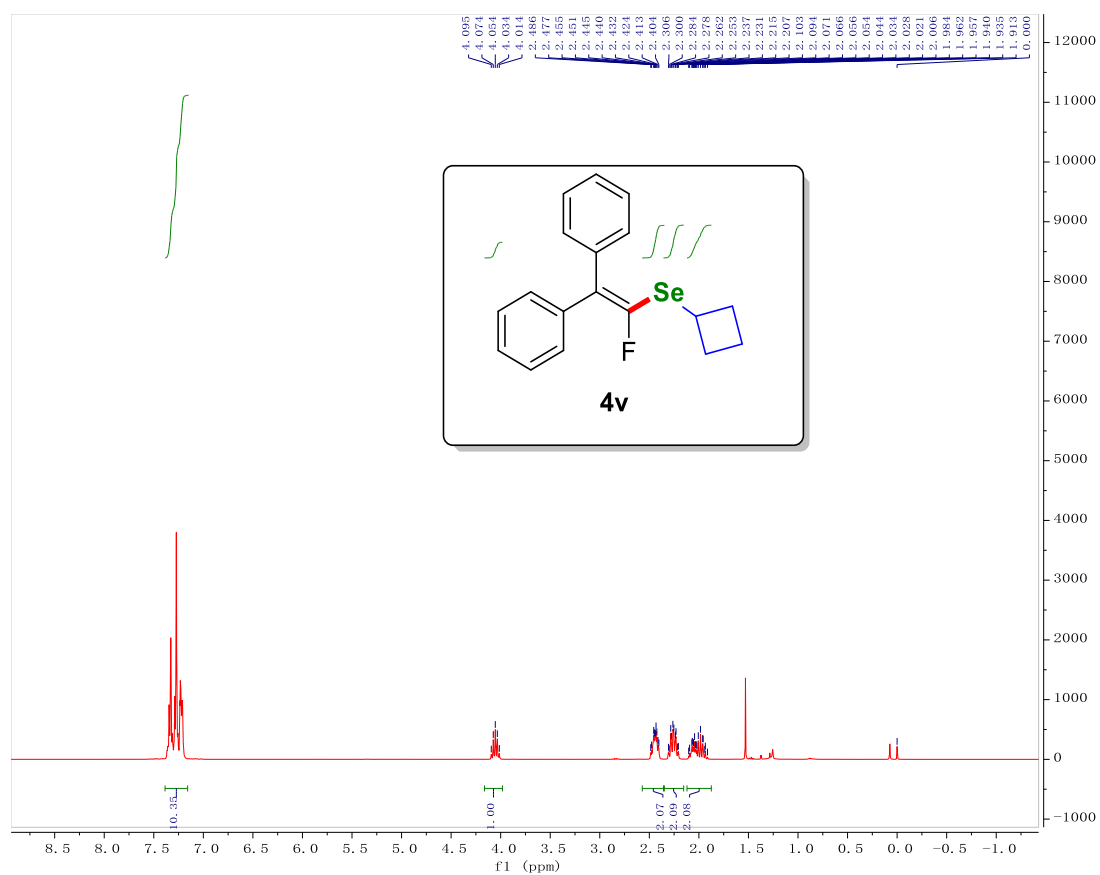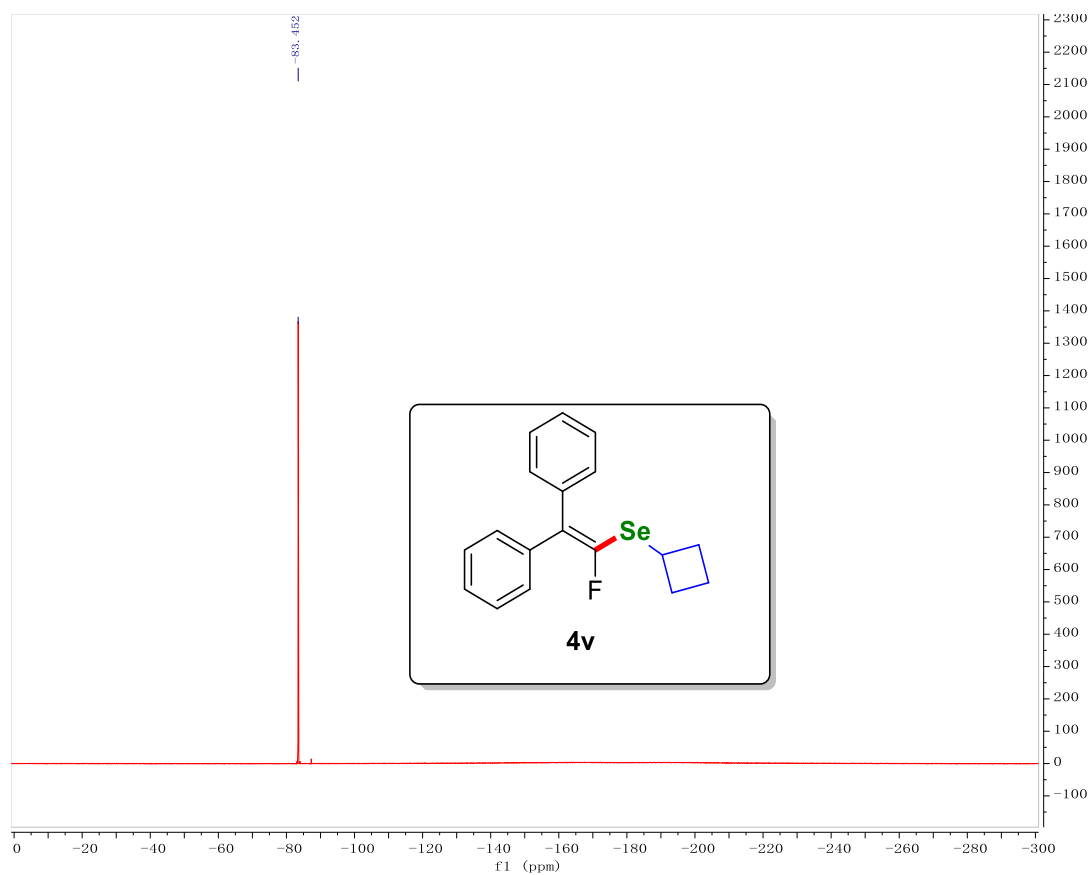

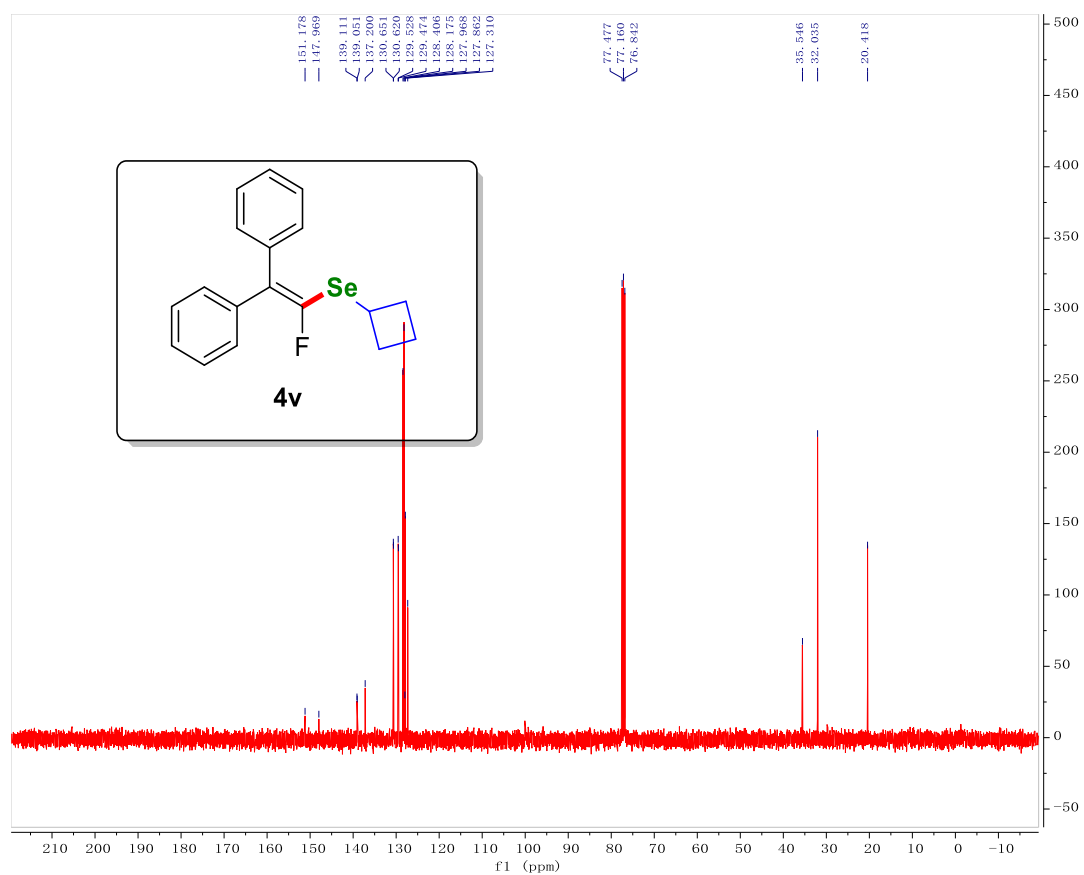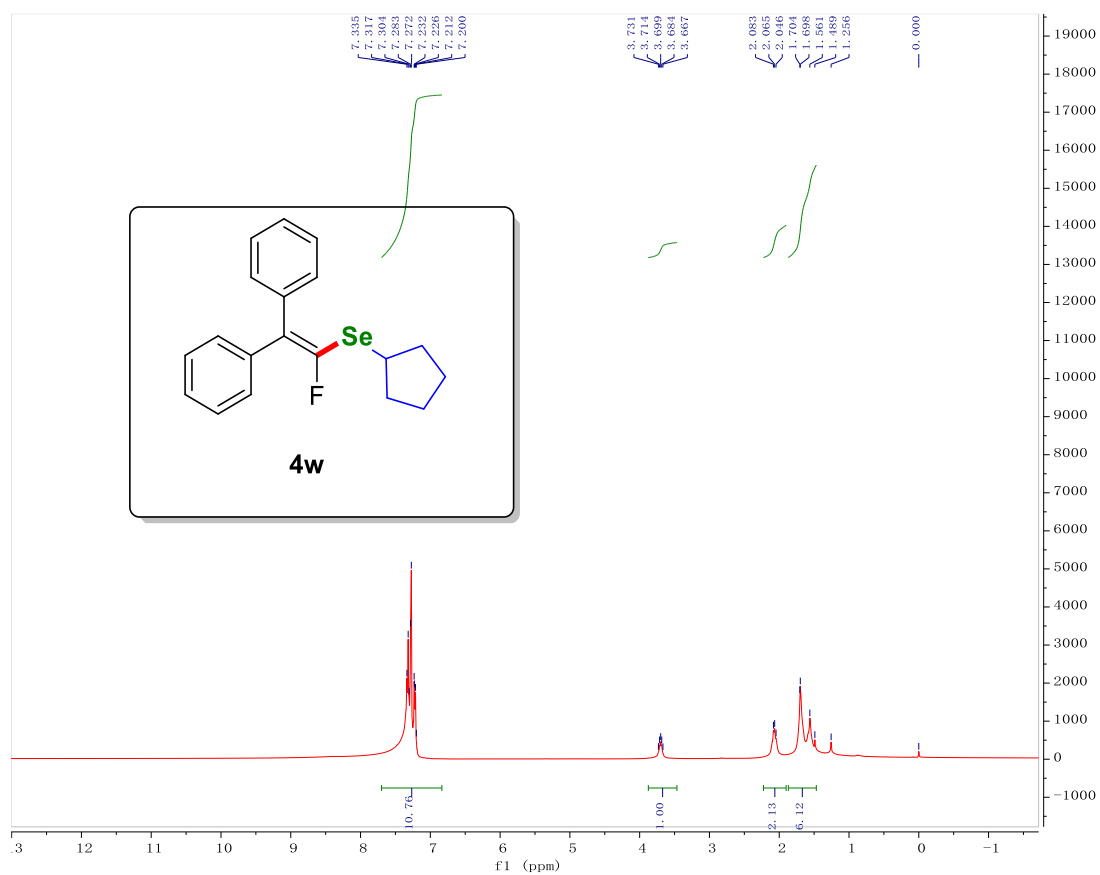

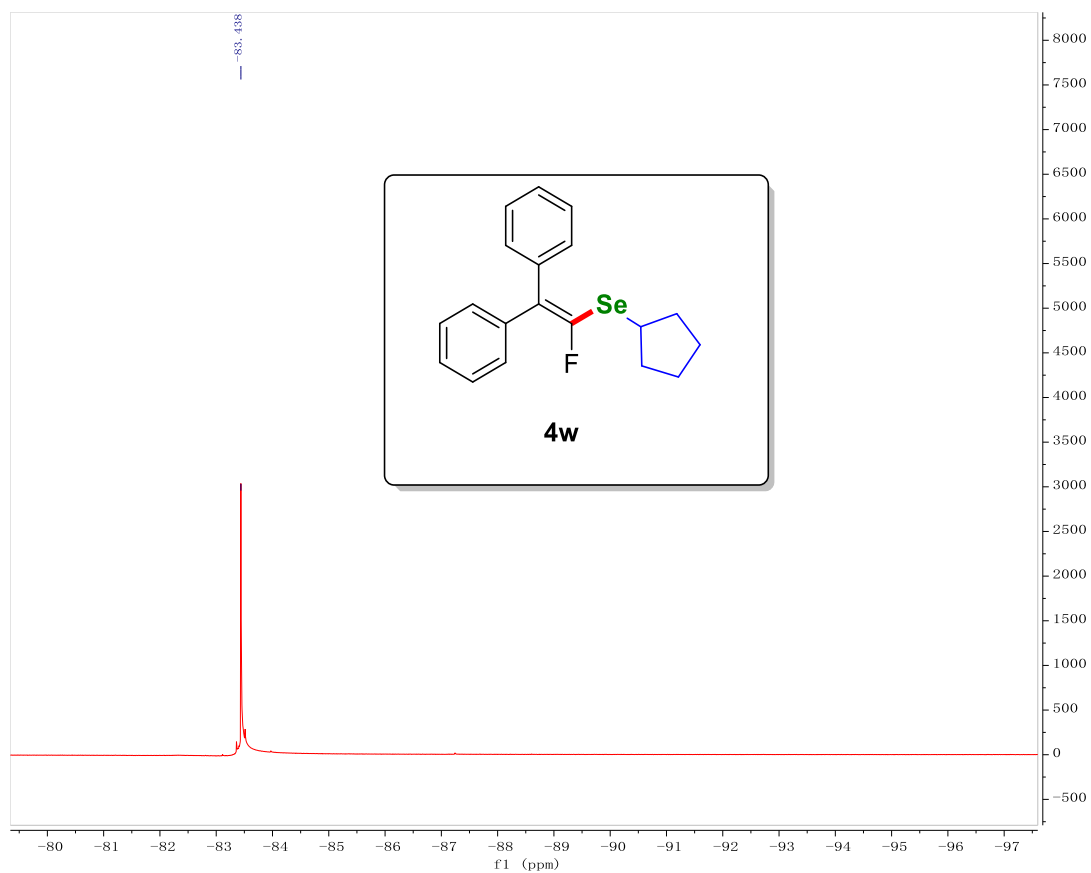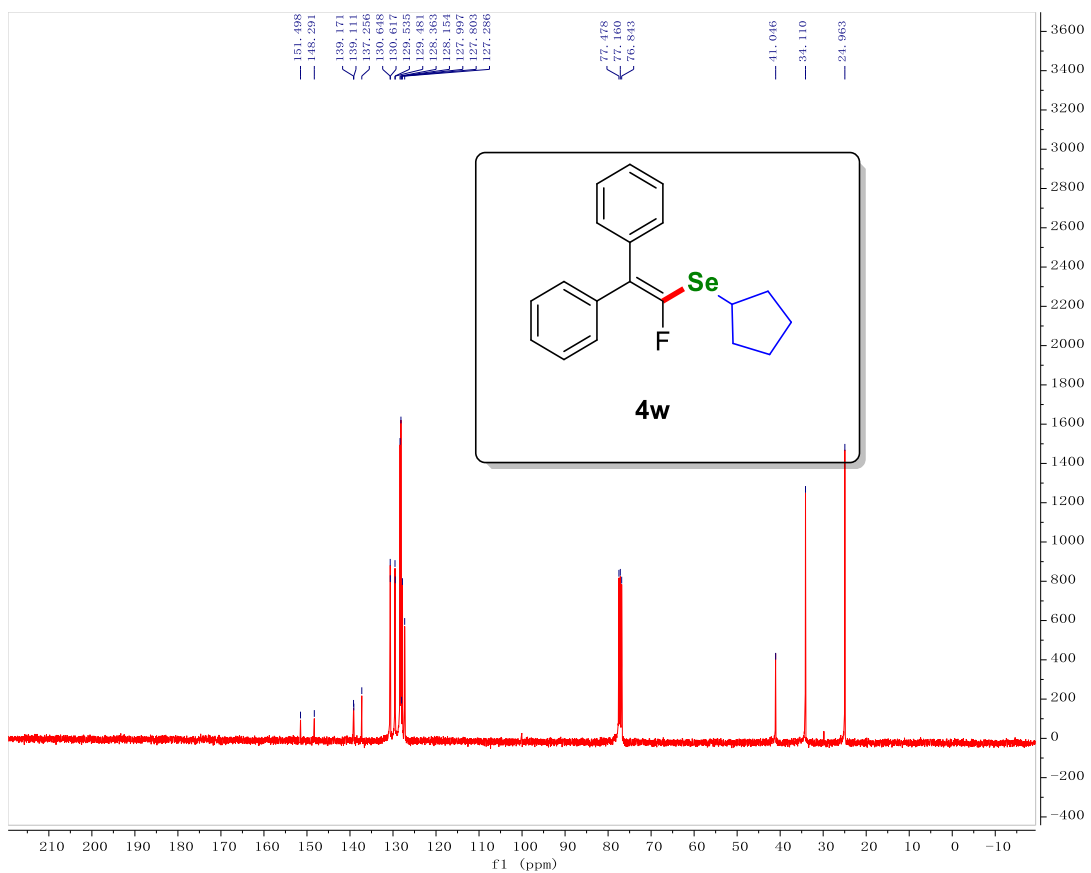

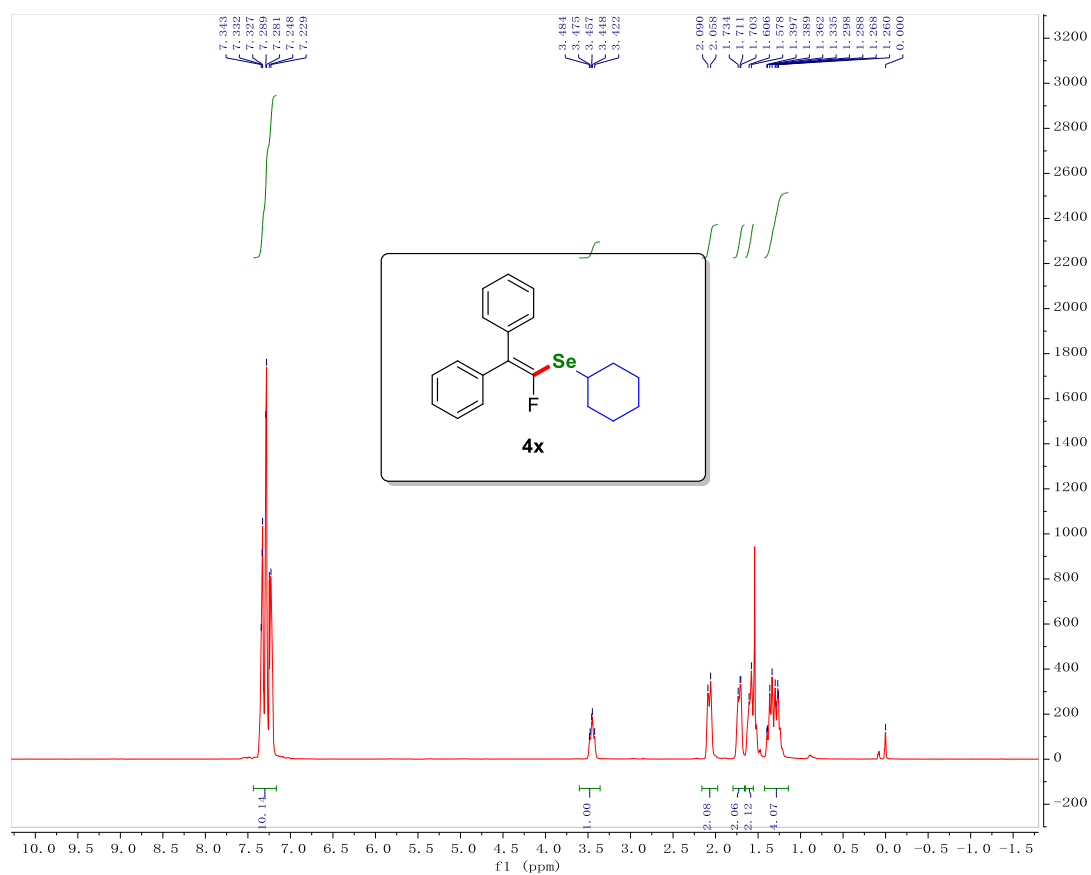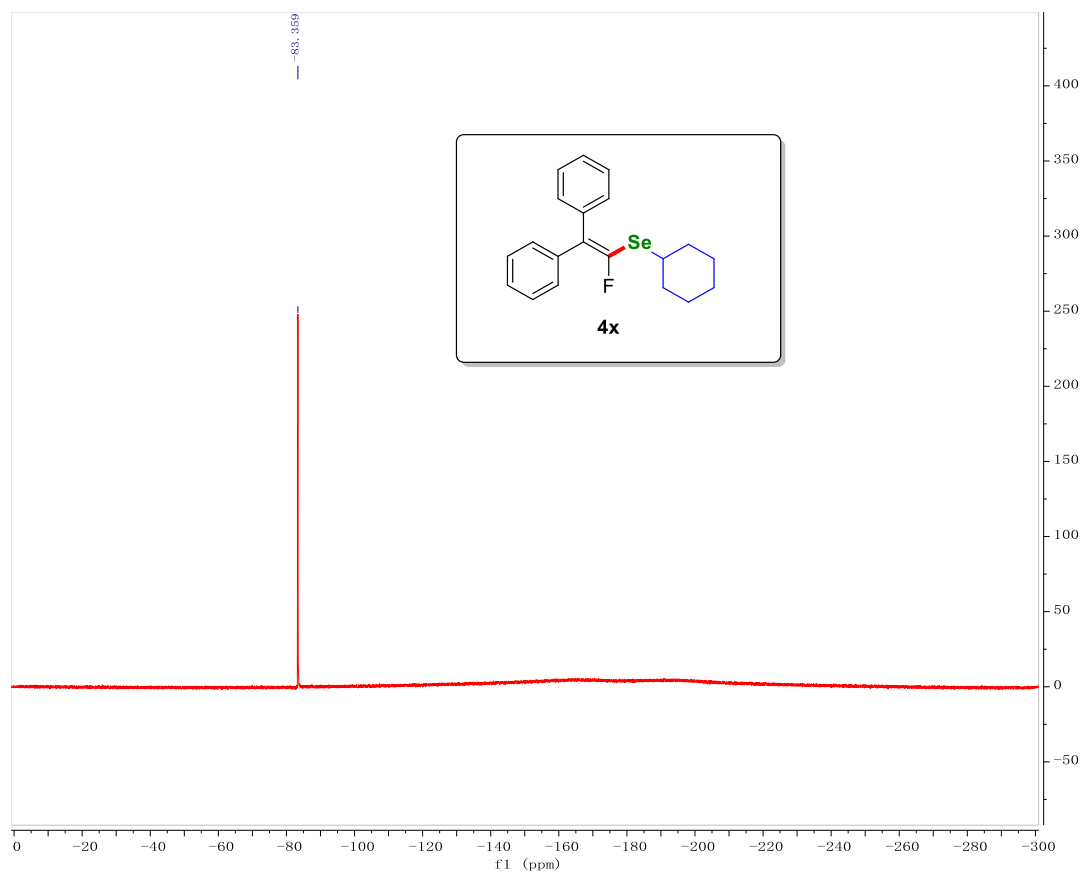

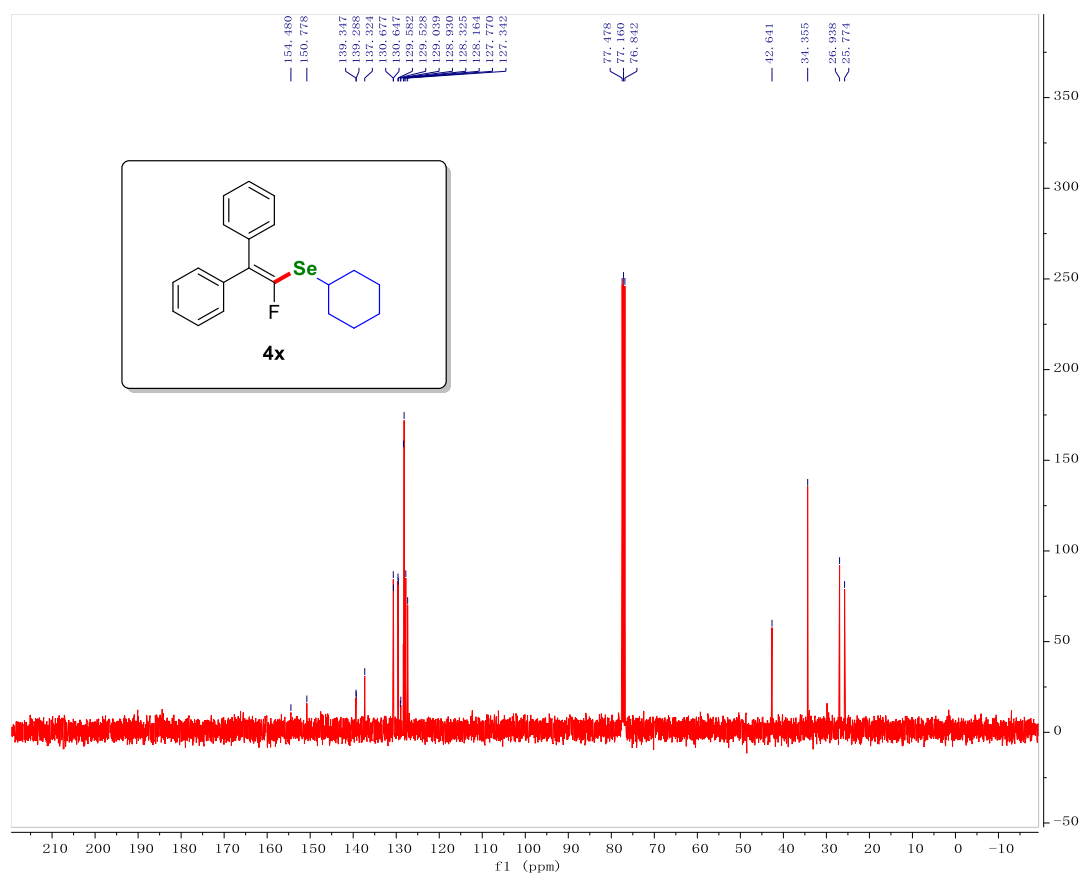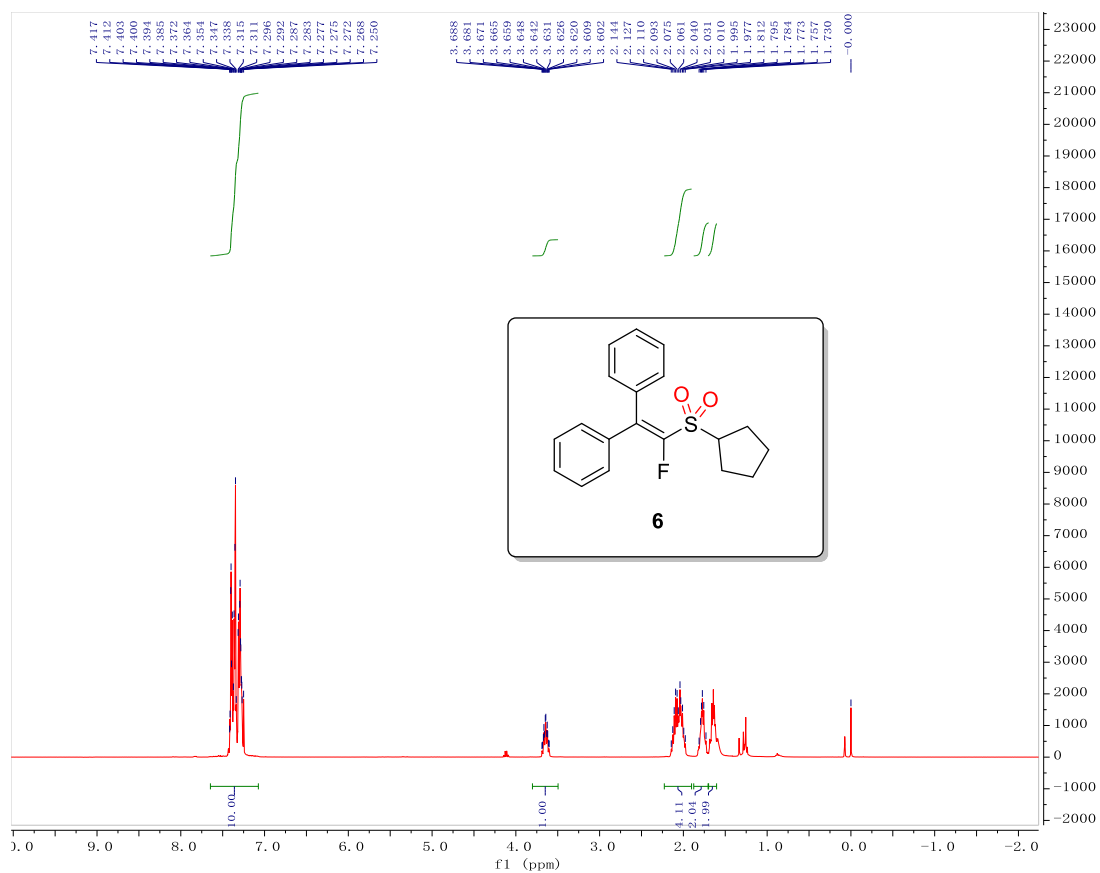

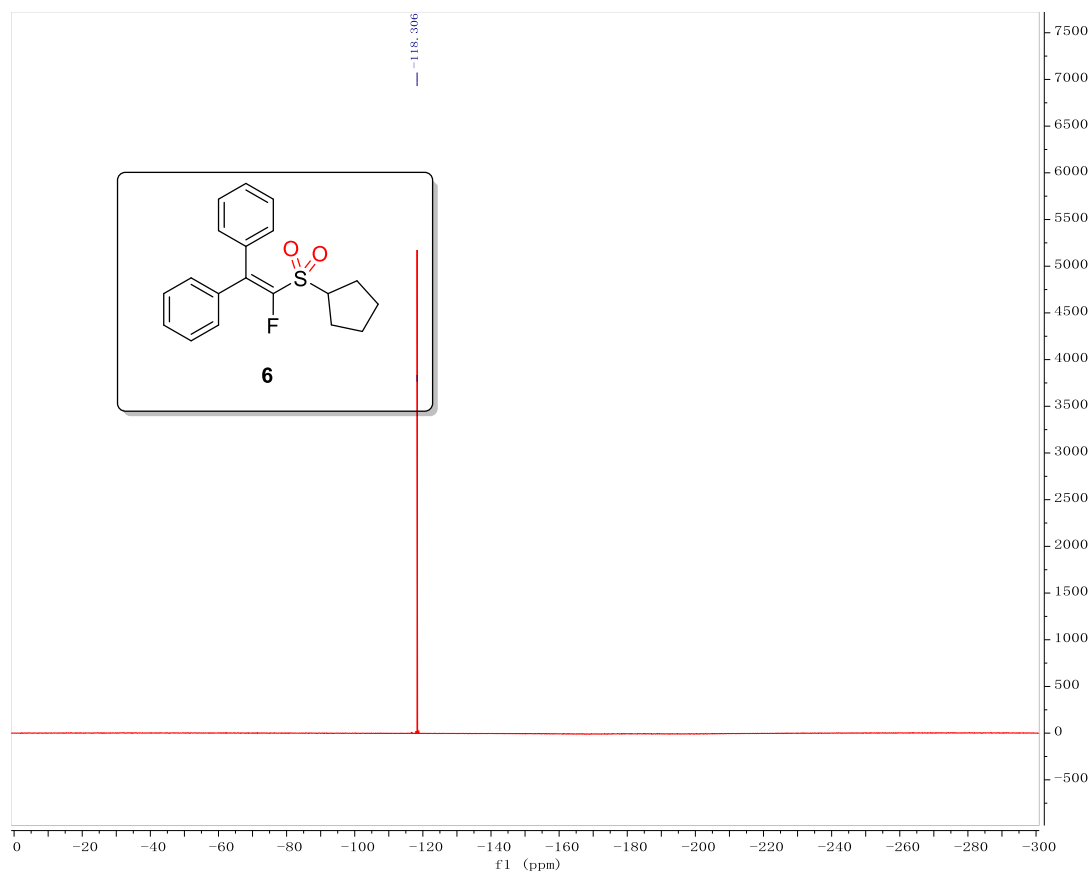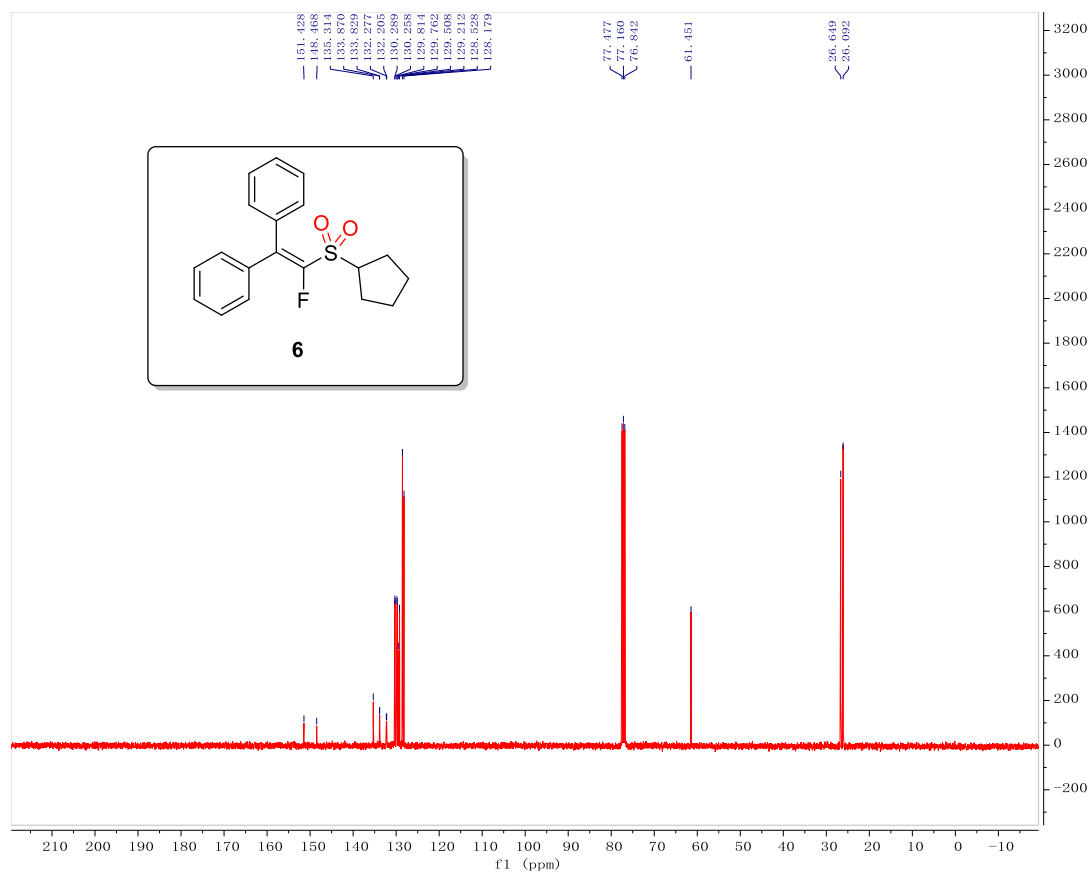



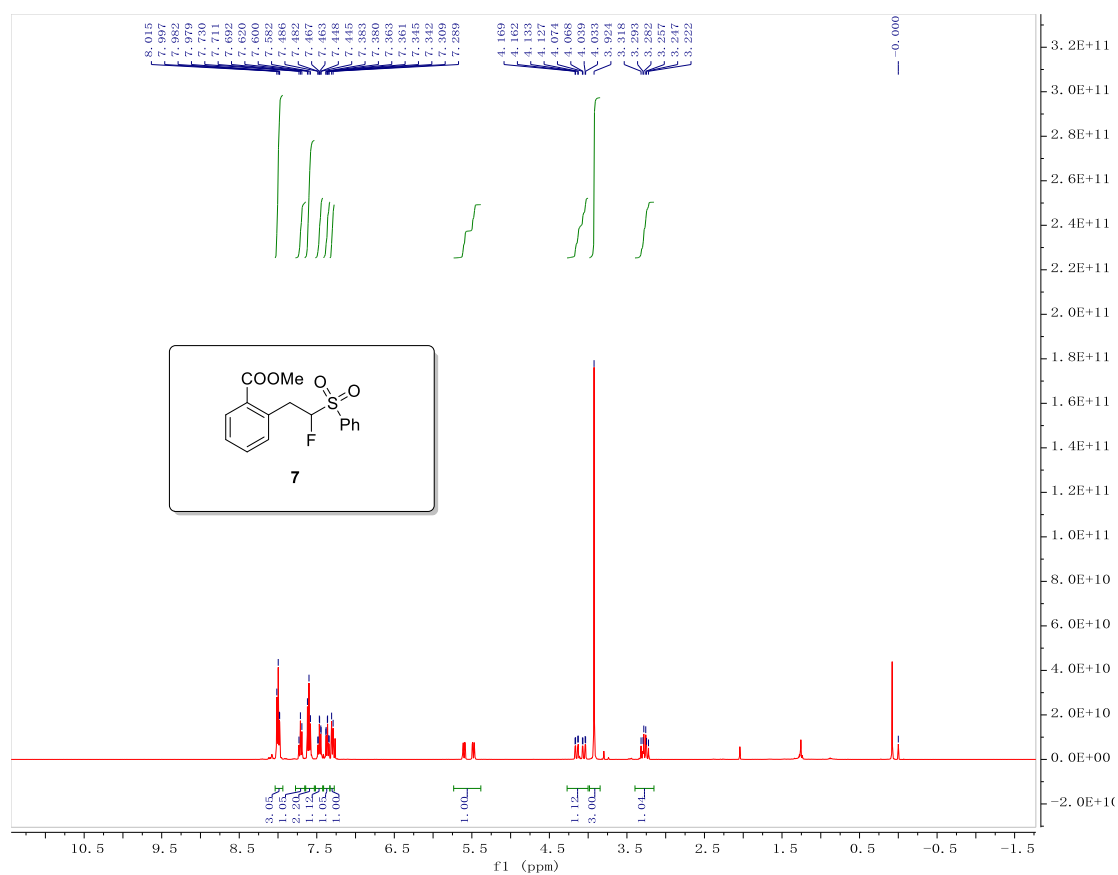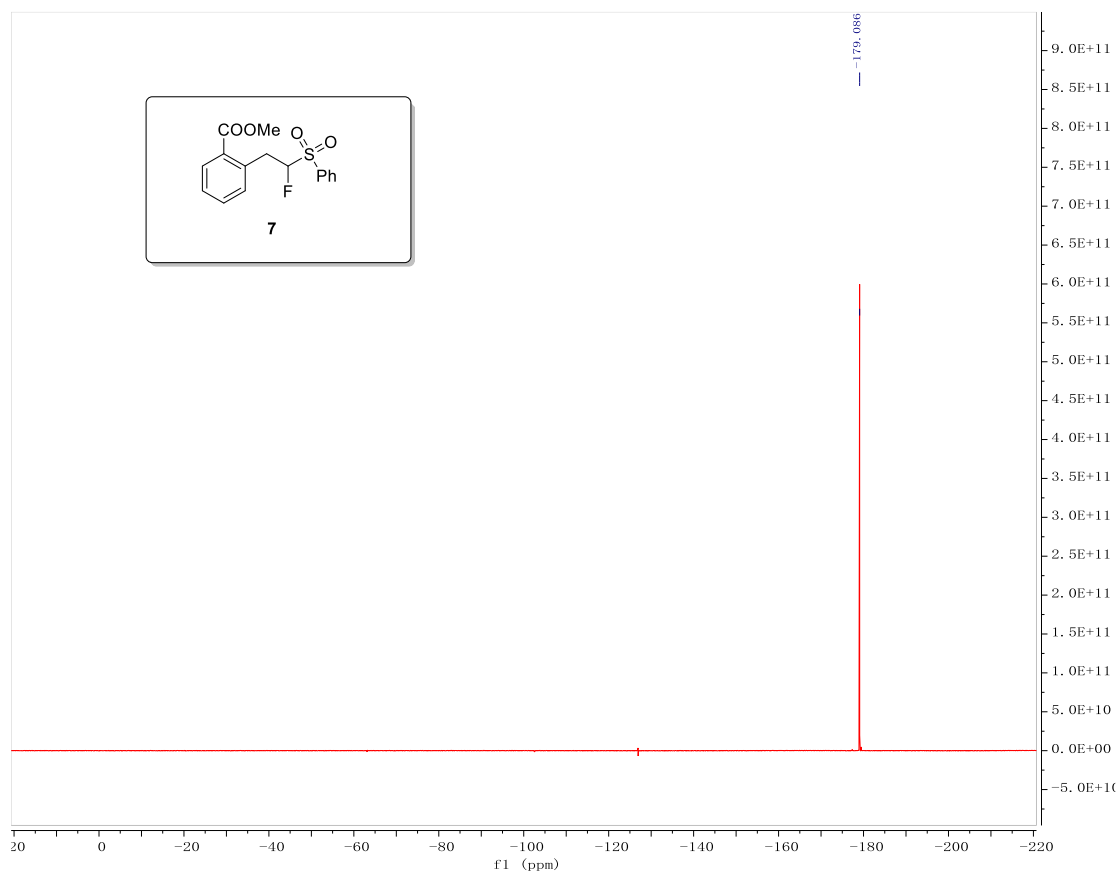

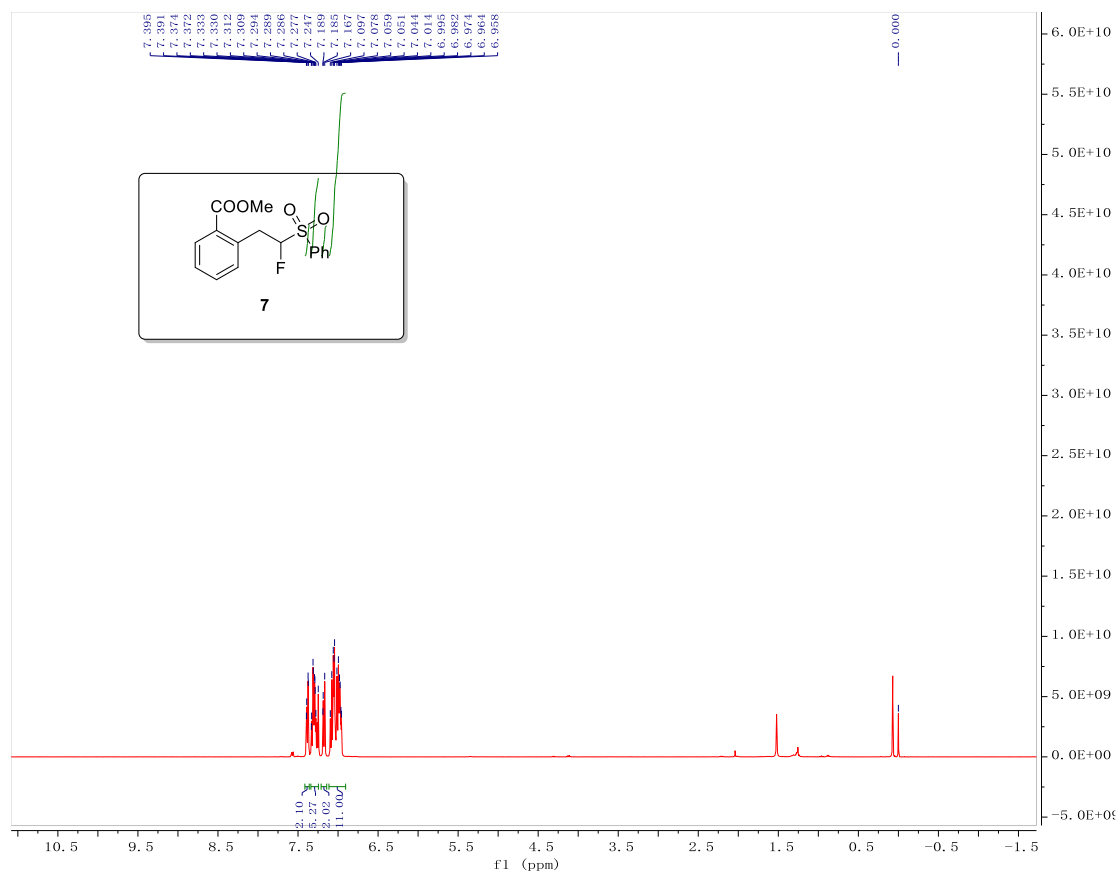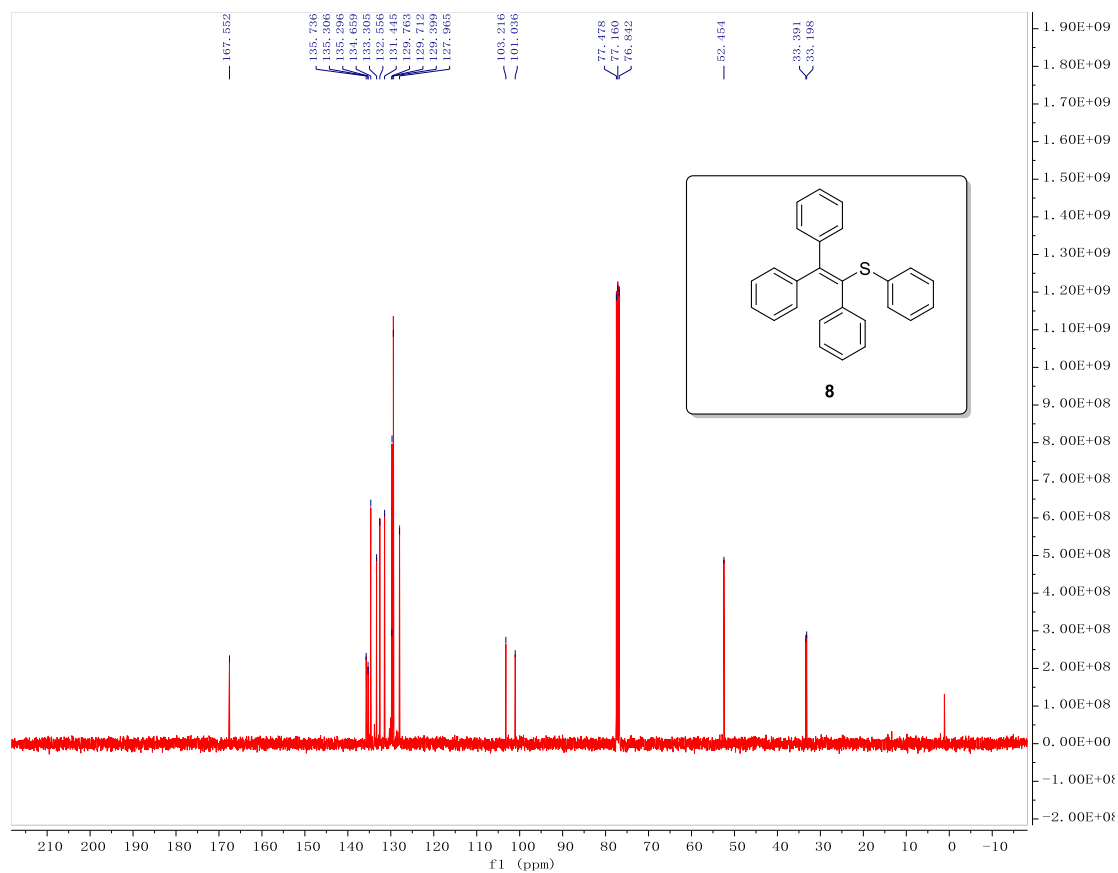

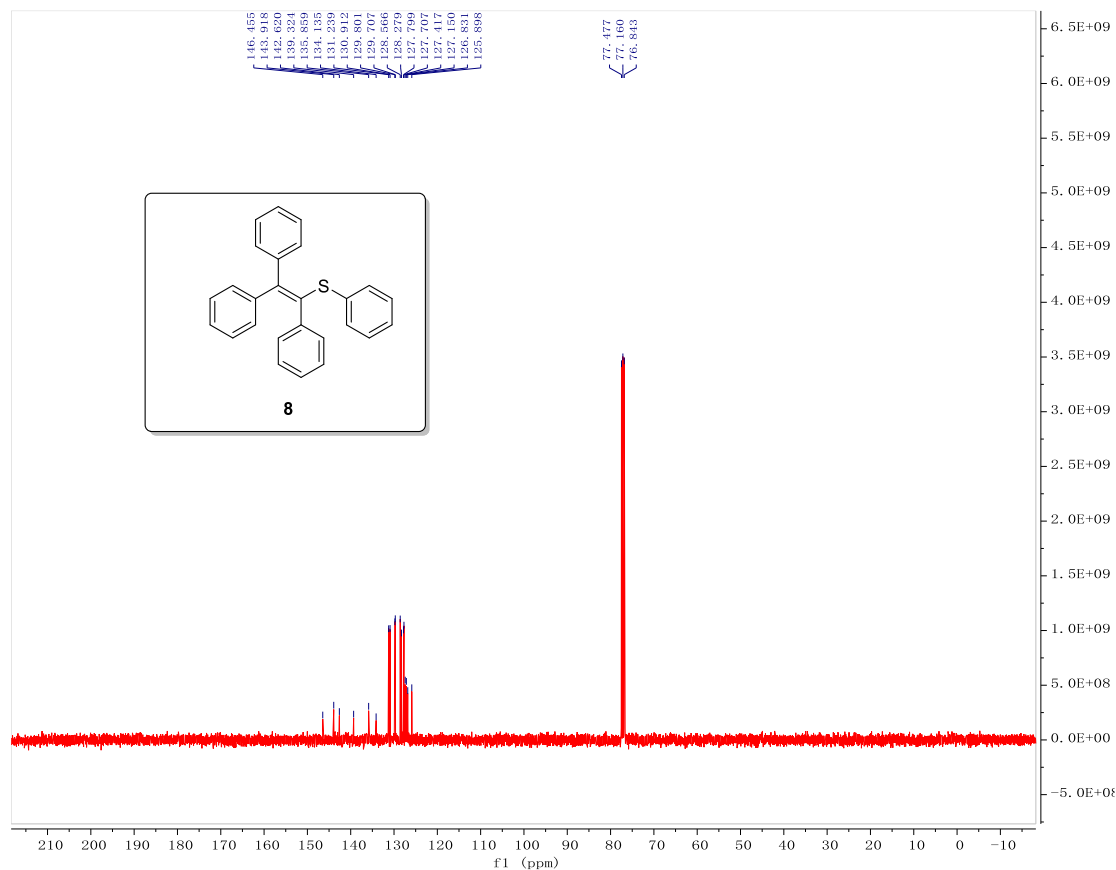

**Ee of 4r=97%**

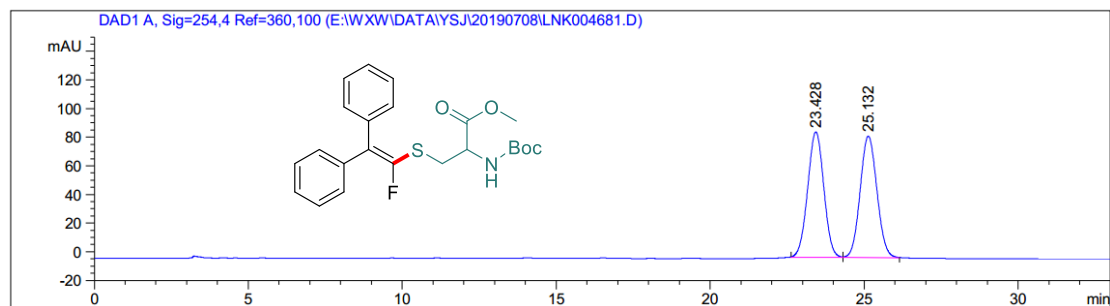

Signal 1: DAD1 A, Sig=254,4 Ref=360,100

| Peak # | RetTime [min] | Type | Width [min] | Area [mAU*s] | Height [mAU] | Area %  |
|--------|---------------|------|-------------|--------------|--------------|---------|
| 1      | 23.428        | BV   | 0.5701      | 3202.75708   | 87.69424     | 49.9452 |
| 2      | 25.132        | VB   | 0.5933      | 3209.79028   | 84.86308     | 50.0548 |

Totals : 6412.54736 172.55732

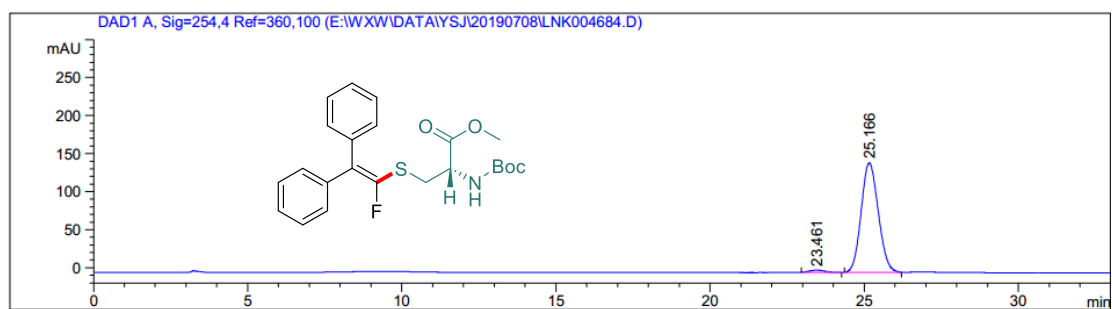

Signal 1: DAD1 A, Sig=254,4 Ref=360,100

| Peak # | RetTime [min] | Type | Width [min] | Area [mAU*s] | Height [mAU] | Area %  |
|--------|---------------|------|-------------|--------------|--------------|---------|
| 1      | 23.461        | BB   | 0.4968      | 97.39801     | 2.96842      | 1.7179  |
| 2      | 25.166        | BB   | 0.6032      | 5572.21777   | 144.07410    | 98.2821 |

Totals : 5669.61578 147.04252
